# Supplementary material for: Integrative Physiological, Metabolomic, and Transcriptomic Analyses Provide New Insights into Potato Drought Stress Responses
Source: Research Square preprint supplement (doi:10.21203/rs.3.rs-7885634/v1), 2025-11-17
Supplement: Supplementary file 1 [file 51237e25fc4fc1d960020b3c.xlsx]

## Sheet: Sheet1
Additional file 6: TF (Transcription Factor) prediction details table
Transcript ID	Gene ID	Gene Name	Gene Description	Family	DNA domain	Domain description	Evalue	Score	TF id	Hit pident	Hit evalue
Soltu.Atl_v3.03_3G008590.1	Soltu.Atl_v3.03_3G008590			ZF-HD	PF04770	ZF-HD protein dimerisation region	6e-29	100	Sopen03g014850.1	90.3	6.44e-46
Soltu.Atl_v3.08_0G005450.1	Soltu.Atl_v3.08_0G005450			MYB	PF00249	Myb-like DNA-binding domain	5.3e-29	100	PGSC0003DMP400057504	94.1	1.18e-110
MSTRG.60572.1	Soltu.Atl_v3.09_2G006190			MYB	PF00249	Myb-like DNA-binding domain	4.6e-29	100.2	PGSC0003DMP400003606	97.3	1.51e-212
Soltu.Atl_v3.10_1G009210.2	Soltu.Atl_v3.10_1G009210			B3	PF02362	B3 DNA binding domain	4.6e-29	100.2	PGSC0003DMP400048918	97.9	3.45e-122
Soltu.Atl_v3.10_3G010260.2	Soltu.Atl_v3.10_3G010260			B3	PF02362	B3 DNA binding domain	4.6e-29	100.2	PGSC0003DMP400048918	97.9	3.45e-122
Soltu.Atl_v3.06_2G016340.1	Soltu.Atl_v3.06_2G016340			NAC	PF02365	No apical meristem (NAM) protein	7.6e-29	100.3	PGSC0003DMP400045251	98.8	3.97e-253
Soltu.Atl_v3.02_1G008630.1	Soltu.Atl_v3.02_1G008630			ZF-HD	PF04770	ZF-HD protein dimerisation region	4.8e-29	100.3	PGSC0003DMP400023373	90.6	1.53e-191
Soltu.Atl_v3.06_4G011850.1	Soltu.Atl_v3.06_4G011850			NAC	PF02365	No apical meristem (NAM) protein	6.8e-29	100.4	PGSC0003DMP400045251	98.5	1.89e-251
Soltu.Atl_v3.07_1G017530.1	Soltu.Atl_v3.07_1G017530			NAC	PF02365	No apical meristem (NAM) protein	6.7e-29	100.4	PGSC0003DMP400021925	97.2	2.49e-202
Soltu.Atl_v3.08_0G003770.1	Soltu.Atl_v3.08_0G003770			NAC	PF02365	No apical meristem (NAM) protein	6.7e-29	100.4	PGSC0003DMP400026135	99	1.19e-203
Soltu.Atl_v3.08_0G005140.1	Soltu.Atl_v3.08_0G005140			NAC	PF02365	No apical meristem (NAM) protein	6.7e-29	100.4	PGSC0003DMP400026135	100	1.3e-207
Soltu.Atl_v3.08_1G000180.1	Soltu.Atl_v3.08_1G000180			NAC	PF02365	No apical meristem (NAM) protein	6.7e-29	100.4	PGSC0003DMP400026135	100	1.3e-207
Soltu.Atl_v3.02_2G010030.1	Soltu.Atl_v3.02_2G010030			ZF-HD	PF04770	ZF-HD protein dimerisation region	4.7e-29	100.4	PGSC0003DMP400023373	81.8	3.98e-168
Soltu.Atl_v3.02_3G009870.1	Soltu.Atl_v3.02_3G009870			ZF-HD	PF04770	ZF-HD protein dimerisation region	4.5e-29	100.4	PGSC0003DMP400023373	95.4	5.56e-192
Soltu.Atl_v3.06_2G021840.1	Soltu.Atl_v3.06_2G021840			MIKC	PF01486	K-box region	4.4e-29	100.4	PGSC0003DMP400007292	98.8	5.05e-113
Soltu.Atl_v3.06_3G015780.1	Soltu.Atl_v3.06_3G015780			MIKC	PF01486	K-box region	4.4e-29	100.4	PGSC0003DMP400007292	98.8	5.05e-113
Soltu.Atl_v3.02_1G001320.1	Soltu.Atl_v3.02_1G001320			B3	PF02362	B3 DNA binding domain	3.7e-29	100.4	PGSC0003DMP400029745	92.6	4.06e-244
Soltu.Atl_v3.07_4G021580.1	Soltu.Atl_v3.07_4G021580			NAC	PF02365	No apical meristem (NAM) protein	6.5e-29	100.5	PGSC0003DMP400021925	97.6	6.12e-203
Soltu.Atl_v3.02_2G024010.1	Soltu.Atl_v3.02_2G024010			NAC	PF02365	No apical meristem (NAM) protein	6.4e-29	100.5	PGSC0003DMP400006341	98	6.36e-256
Soltu.Atl_v3.02_2G024010.2	Soltu.Atl_v3.02_2G024010			NAC	PF02365	No apical meristem (NAM) protein	6.4e-29	100.5	PGSC0003DMP400006341	98	6.36e-256
Soltu.Atl_v3.02_3G025270.1	Soltu.Atl_v3.02_3G025270			NAC	PF02365	No apical meristem (NAM) protein	6.4e-29	100.5	PGSC0003DMP400006341	98.3	3.83e-257
Soltu.Atl_v3.02_3G025270.2	Soltu.Atl_v3.02_3G025270			NAC	PF02365	No apical meristem (NAM) protein	6.4e-29	100.5	PGSC0003DMP400006341	98.3	3.83e-257
Soltu.Atl_v3.05_3G020100.1	Soltu.Atl_v3.05_3G020100			ZF-HD	PF04770	ZF-HD protein dimerisation region	4.3e-29	100.5	PGSC0003DMP400056594	90.3	2.14e-120
Soltu.Atl_v3.08_0G005690.1	Soltu.Atl_v3.08_0G005690			MYB	PF00249	Myb-like DNA-binding domain	3.7e-29	100.5	PGSC0003DMP400057504	100	1.54e-117
Soltu.Atl_v3.08_0G005690.2	Soltu.Atl_v3.08_0G005690			MYB	PF00249	Myb-like DNA-binding domain	3.7e-29	100.5	PGSC0003DMP400057504	100	1.54e-117
MSTRG.61813.1	Soltu.Atl_v3.09_3G004820			MYB	PF00249	Myb-like DNA-binding domain	3.6e-29	100.5	PGSC0003DMP400003606	95.7	5.53e-210
Soltu.Atl_v3.03_3G017350.1	Soltu.Atl_v3.03_3G017350			NAC	PF02365	No apical meristem (NAM) protein	5.9e-29	100.6	Sopen03g023670.1	89.8	8.43e-124
Soltu.Atl_v3.05_4G019140.1	Soltu.Atl_v3.05_4G019140			GeBP	PF04504	Protein of unknown function, DUF573	5.2e-29	100.6	PGSC0003DMP400068550	96.1	2.96e-229
Soltu.Atl_v3.07_3G015090.1	Soltu.Atl_v3.07_3G015090			MYB	PF00249	Myb-like DNA-binding domain	3.5e-29	100.6	CA07g12950	66.5	1.31e-79
Soltu.Atl_v3.04_3G017070.1	Soltu.Atl_v3.04_3G017070			MYB	PF00249	Myb-like DNA-binding domain	3.4e-29	100.6	PGSC0003DMP400008822	94.8	2.75e-136
Soltu.Atl_v3.06_2G023490.3	Soltu.Atl_v3.06_2G023490			C3H	PF00642	Zinc finger C-x8-C-x5-C-x3-H type (and similar)	2.2e-29	100.6	PGSC0003DMP400047012	98.4	2.98e-184
Soltu.Atl_v3.06_3G017440.3	Soltu.Atl_v3.06_3G017440			C3H	PF00642	Zinc finger C-x8-C-x5-C-x3-H type (and similar)	2.2e-29	100.6	PGSC0003DMP400047012	98.4	2.98e-184
Soltu.Atl_v3.05_1G020070.1	Soltu.Atl_v3.05_1G020070			GeBP	PF04504	Protein of unknown function, DUF573	4.9e-29	100.7	PGSC0003DMP400068550	99.4	6.3e-239
Soltu.Atl_v3.05_2G019040.1	Soltu.Atl_v3.05_2G019040			GeBP	PF04504	Protein of unknown function, DUF573	4.9e-29	100.7	PGSC0003DMP400068550	97.6	9.55e-234
MSTRG.34456.4	Soltu.Atl_v3.05_1G005340			MYB	PF00249	Myb-like DNA-binding domain	3.1e-29	100.7	PGSC0003DMP400044377	99.1	6.15e-165
MSTRG.16032.3	Soltu.Atl_v3.02_3G025270			NAC	PF02365	No apical meristem (NAM) protein	5.1e-29	100.8	PGSC0003DMP400006341	97.7	4.48e-256
MSTRG.68627.2	Soltu.Atl_v3.10_4G007830			NAC	PF02365	No apical meristem (NAM) protein	5.1e-29	100.8	PGSC0003DMP400006341	96.3	5.88e-251
Soltu.Atl_v3.10_4G007830.1	Soltu.Atl_v3.10_4G007830			NAC	PF02365	No apical meristem (NAM) protein	5.1e-29	100.8	PGSC0003DMP400006341	96.3	5.88e-251
Soltu.Atl_v3.03_1G012780.1	Soltu.Atl_v3.03_1G012780			NAC	PF02365	No apical meristem (NAM) protein	5e-29	100.8	PGSC0003DMP400037408	87	7.4e-97
Soltu.Atl_v3.05_3G019990.1	Soltu.Atl_v3.05_3G019990			GeBP	PF04504	Protein of unknown function, DUF573	4.5e-29	100.8	PGSC0003DMP400068550	95.7	5.41e-233
Soltu.Atl_v3.06_3G000330.1	Soltu.Atl_v3.06_3G000330			MYB	PF00249	Myb-like DNA-binding domain	3e-29	100.8	Solyc06g009480.1.1	88.3	1.44e-150
Soltu.Atl_v3.02_3G002320.1	Soltu.Atl_v3.02_3G002320			B3	PF02362	B3 DNA binding domain	2.8e-29	100.8	PGSC0003DMP400029745	91	1.58e-239
MSTRG.11498.1	Soltu.Atl_v3.02_1G022250			NAC	PF02365	No apical meristem (NAM) protein	5e-29	100.9	PGSC0003DMP400006341	96.3	4.84e-252
Soltu.Atl_v3.02_1G022250.1	Soltu.Atl_v3.02_1G022250			NAC	PF02365	No apical meristem (NAM) protein	5e-29	100.9	PGSC0003DMP400006341	96.3	4.84e-252
MSTRG.38105.2	Soltu.Atl_v3.05_3G021930			SBP	PF03110	SBP domain	3e-29	100.9	PGSC0003DMP400047182	88.3	5.33e-226
MSTRG.58590.1	Soltu.Atl_v3.09_0G006420			MYB	PF00249	Myb-like DNA-binding domain	2.7e-29	100.9	PGSC0003DMP400003606	96.7	4.57e-212
MSTRG.63328.1	Soltu.Atl_v3.09_4G004550			MYB	PF00249	Myb-like DNA-binding domain	2.7e-29	100.9	PGSC0003DMP400003606	96.7	4.57e-212
Soltu.Atl_v3.02_4G022340.1	Soltu.Atl_v3.02_4G022340			MIKC	PF01486	K-box region	2.9e-29	101	PGSC0003DMP400002482	100	2.87e-113
MSTRG.36728.3	Soltu.Atl_v3.05_2G021280			SBP	PF03110	SBP domain	2.8e-29	101	PGSC0003DMP400047182	98.6	2.34e-243
MSTRG.18230.1	Soltu.Atl_v3.02_4G022700			TCP	PF03634	TCP family transcription factor	8e-29	101.1	PGSC0003DMP400002458	100	3.21e-204
MSTRG.83492.1	Soltu.Atl_v3.S076250			TCP	PF03634	TCP family transcription factor	7.6e-29	101.1	PGSC0003DMP400002458	100	3.21e-204
Soltu.Atl_v3.01_1G005220.3	Soltu.Atl_v3.01_1G005220			AP2	PF00847	AP2 domain	2.7e-29	101.1	PGSC0003DMP400039350	99.7	1.61e-237
Soltu.Atl_v3.01_1G005220.5	Soltu.Atl_v3.01_1G005220			AP2	PF00847	AP2 domain	2.7e-29	101.1	PGSC0003DMP400039350	99.7	1.61e-237
Soltu.Atl_v3.01_3G005220.3	Soltu.Atl_v3.01_3G005220			AP2	PF00847	AP2 domain	2.7e-29	101.1	PGSC0003DMP400039350	99.7	1.61e-237
Soltu.Atl_v3.01_3G005220.5	Soltu.Atl_v3.01_3G005220			AP2	PF00847	AP2 domain	2.7e-29	101.1	PGSC0003DMP400039350	99.7	1.61e-237
Soltu.Atl_v3.05_4G019280.1	Soltu.Atl_v3.05_4G019280			ZF-HD	PF04770	ZF-HD protein dimerisation region	2.7e-29	101.1	PGSC0003DMP400056594	98.3	9.95e-134
Soltu.Atl_v3.S092570.3	Soltu.Atl_v3.S092570			SBP	PF03110	SBP domain	2.6e-29	101.1	Solyc04g045560.2.1	66.9	1.65e-139
Soltu.Atl_v3.11_4G018690.1	Soltu.Atl_v3.11_4G018690			MYB	PF00249	Myb-like DNA-binding domain	2.3e-29	101.1	PGSC0003DMP400047694	98.1	0
Soltu.Atl_v3.11_4G018690.2	Soltu.Atl_v3.11_4G018690			MYB	PF00249	Myb-like DNA-binding domain	2.3e-29	101.1	PGSC0003DMP400047694	98.1	0
Soltu.Atl_v3.06_1G012100.5	Soltu.Atl_v3.06_1G012100			C3H	PF00642	Zinc finger C-x8-C-x5-C-x3-H type (and similar)	1.5e-29	101.1	PGSC0003DMP400047012	100	1.77e-190
Soltu.Atl_v3.06_1G012100.6	Soltu.Atl_v3.06_1G012100			C3H	PF00642	Zinc finger C-x8-C-x5-C-x3-H type (and similar)	1.5e-29	101.1	PGSC0003DMP400047012	100	1.77e-190
Soltu.Atl_v3.06_4G016590.5	Soltu.Atl_v3.06_4G016590			C3H	PF00642	Zinc finger C-x8-C-x5-C-x3-H type (and similar)	1.5e-29	101.1	PGSC0003DMP400047012	100	1.77e-190
Soltu.Atl_v3.06_4G016590.6	Soltu.Atl_v3.06_4G016590			C3H	PF00642	Zinc finger C-x8-C-x5-C-x3-H type (and similar)	1.5e-29	101.1	PGSC0003DMP400047012	100	1.77e-190
Soltu.Atl_v3.11_2G013640.1	Soltu.Atl_v3.11_2G013640			MYB	PF00249	Myb-like DNA-binding domain	2.3e-29	101.2	PGSC0003DMP400047694	98.7	0
Soltu.Atl_v3.06_2G009070.1	Soltu.Atl_v3.06_2G009070			MYB	PF00249	Myb-like DNA-binding domain	2.2e-29	101.2	PGSC0003DMP400034714	88.9	9.43e-150
Soltu.Atl_v3.S102010.3	Soltu.Atl_v3.S102010			NAC	PF02365	No apical meristem (NAM) protein	3.5e-29	101.3	PGSC0003DMP400040418	100	1.46e-123
Soltu.Atl_v3.S102060.2	Soltu.Atl_v3.S102060			NAC	PF02365	No apical meristem (NAM) protein	3.5e-29	101.3	PGSC0003DMP400040418	100	1.46e-123
Soltu.Atl_v3.05_1G004540.1	Soltu.Atl_v3.05_1G004540			ZF-HD	PF04770	ZF-HD protein dimerisation region	2.4e-29	101.3	PGSC0003DMP400054468	96.6	1.66e-170
Soltu.Atl_v3.05_2G019150.1	Soltu.Atl_v3.05_2G019150			ZF-HD	PF04770	ZF-HD protein dimerisation region	2.4e-29	101.3	PGSC0003DMP400056594	94.3	3.08e-128
Soltu.Atl_v3.05_3G004730.1	Soltu.Atl_v3.05_3G004730			ZF-HD	PF04770	ZF-HD protein dimerisation region	2.4e-29	101.3	PGSC0003DMP400054468	96.6	1.66e-170
Soltu.Atl_v3.05_4G005170.1	Soltu.Atl_v3.05_4G005170			ZF-HD	PF04770	ZF-HD protein dimerisation region	2.4e-29	101.3	PGSC0003DMP400054468	96.6	1.66e-170
MSTRG.1529.1	Soltu.Atl_v3.01_1G005220			AP2	PF00847	AP2 domain	2.3e-29	101.3	PGSC0003DMP400039350	99.7	6.43e-237
MSTRG.3525.3	Soltu.Atl_v3.01_2G005850			AP2	PF00847	AP2 domain	2.3e-29	101.3	PGSC0003DMP400039350	93.3	5.89e-217
MSTRG.5530.1	Soltu.Atl_v3.01_3G005220			AP2	PF00847	AP2 domain	2.3e-29	101.3	PGSC0003DMP400039350	99.7	6.43e-237
Soltu.Atl_v3.01_1G005220.1	Soltu.Atl_v3.01_1G005220			AP2	PF00847	AP2 domain	2.3e-29	101.3	PGSC0003DMP400039350	99.7	6.43e-237
Soltu.Atl_v3.01_1G005220.2	Soltu.Atl_v3.01_1G005220			AP2	PF00847	AP2 domain	2.3e-29	101.3	PGSC0003DMP400039350	99.7	6.43e-237
Soltu.Atl_v3.01_1G005220.4	Soltu.Atl_v3.01_1G005220			AP2	PF00847	AP2 domain	2.3e-29	101.3	PGSC0003DMP400039350	99.7	6.43e-237
Soltu.Atl_v3.01_3G005220.1	Soltu.Atl_v3.01_3G005220			AP2	PF00847	AP2 domain	2.3e-29	101.3	PGSC0003DMP400039350	99.7	6.43e-237
Soltu.Atl_v3.01_3G005220.2	Soltu.Atl_v3.01_3G005220			AP2	PF00847	AP2 domain	2.3e-29	101.3	PGSC0003DMP400039350	99.7	6.43e-237
Soltu.Atl_v3.01_3G005220.4	Soltu.Atl_v3.01_3G005220			AP2	PF00847	AP2 domain	2.3e-29	101.3	PGSC0003DMP400039350	99.7	6.43e-237
Soltu.Atl_v3.11_3G020380.1	Soltu.Atl_v3.11_3G020380			MYB	PF00249	Myb-like DNA-binding domain	2.1e-29	101.3	PGSC0003DMP400047694	97.9	0
Soltu.Atl_v3.11_3G020380.3	Soltu.Atl_v3.11_3G020380			MYB	PF00249	Myb-like DNA-binding domain	2.1e-29	101.3	PGSC0003DMP400047694	97.9	0
Soltu.Atl_v3.S072210.7	Soltu.Atl_v3.S072210			SBP	PF03110	SBP domain	2.1e-29	101.4	Solyc04g045560.2.1	73.9	6.04e-149
Soltu.Atl_v3.11_4G018690.4	Soltu.Atl_v3.11_4G018690			MYB	PF00249	Myb-like DNA-binding domain	1.9e-29	101.4	PGSC0003DMP400047694	98.2	0
Soltu.Atl_v3.11_4G018690.5	Soltu.Atl_v3.11_4G018690			MYB	PF00249	Myb-like DNA-binding domain	1.9e-29	101.4	PGSC0003DMP400047694	98.2	0
Soltu.Atl_v3.11_1G017870.7	Soltu.Atl_v3.11_1G017870			MYB	PF00249	Myb-like DNA-binding domain	1.8e-29	101.5	PGSC0003DMP400047694	97.5	0
Soltu.Atl_v3.11_2G013640.3	Soltu.Atl_v3.11_2G013640			MYB	PF00249	Myb-like DNA-binding domain	1.8e-29	101.5	PGSC0003DMP400047694	98.6	0
Soltu.Atl_v3.11_4G018690.3	Soltu.Atl_v3.11_4G018690			MYB	PF00249	Myb-like DNA-binding domain	1.7e-29	101.5	PGSC0003DMP400047694	98.1	0
Soltu.Atl_v3.06_4G001080.4	Soltu.Atl_v3.06_4G001080			C3H	PF00642	Zinc finger C-x8-C-x5-C-x3-H type (and similar)	1.1e-29	101.5	PGSC0003DMP400009444	77.7	5.76e-144
Soltu.Atl_v3.06_0G013610.1	Soltu.Atl_v3.06_0G013610			NAC	PF02365	No apical meristem (NAM) protein	3e-29	101.6	PGSC0003DMP400050122	93.3	8e-206
Soltu.Atl_v3.08_1G019600.1	Soltu.Atl_v3.08_1G019600			B3	PF02362	B3 DNA binding domain	1.7e-29	101.6	PGSC0003DMP400021619	100	3.45e-283
Soltu.Atl_v3.08_1G019600.3	Soltu.Atl_v3.08_1G019600			B3	PF02362	B3 DNA binding domain	1.7e-29	101.6	PGSC0003DMP400021619	100	3.45e-283
Soltu.Atl_v3.11_1G017870.5	Soltu.Atl_v3.11_1G017870			MYB	PF00249	Myb-like DNA-binding domain	1.7e-29	101.6	PGSC0003DMP400047694	97.7	0
Soltu.Atl_v3.11_2G013640.2	Soltu.Atl_v3.11_2G013640			MYB	PF00249	Myb-like DNA-binding domain	1.7e-29	101.6	PGSC0003DMP400047694	98.8	0
Soltu.Atl_v3.11_3G020380.4	Soltu.Atl_v3.11_3G020380			MYB	PF00249	Myb-like DNA-binding domain	1.7e-29	101.6	PGSC0003DMP400047694	98.2	0
Soltu.Atl_v3.02_3G021220.1	Soltu.Atl_v3.02_3G021220			B3	PF02362	B3 DNA binding domain	1.6e-29	101.6	PGSC0003DMP400021619	97.5	1.04e-280
Soltu.Atl_v3.04_2G009910.1	Soltu.Atl_v3.04_2G009910			B3	PF02362	B3 DNA binding domain	1.6e-29	101.6	PGSC0003DMP400043067	99.2	2.95e-186
Soltu.Atl_v3.11_1G017870.1	Soltu.Atl_v3.11_1G017870			MYB	PF00249	Myb-like DNA-binding domain	1.6e-29	101.6	PGSC0003DMP400047694	97.9	0
Soltu.Atl_v3.11_1G017870.2	Soltu.Atl_v3.11_1G017870			MYB	PF00249	Myb-like DNA-binding domain	1.6e-29	101.6	PGSC0003DMP400047694	97.9	0
Soltu.Atl_v3.11_1G017870.4	Soltu.Atl_v3.11_1G017870			MYB	PF00249	Myb-like DNA-binding domain	1.6e-29	101.6	PGSC0003DMP400047694	97.9	0
Soltu.Atl_v3.S102010.1	Soltu.Atl_v3.S102010			NAC	PF02365	No apical meristem (NAM) protein	2.6e-29	101.7	PGSC0003DMP400040418	100	4.19e-103
Soltu.Atl_v3.S102060.1	Soltu.Atl_v3.S102060			NAC	PF02365	No apical meristem (NAM) protein	2.6e-29	101.7	PGSC0003DMP400040418	100	4.19e-103
Soltu.Atl_v3.02_3G021220.2	Soltu.Atl_v3.02_3G021220			B3	PF02362	B3 DNA binding domain	1.6e-29	101.7	PGSC0003DMP400021619	98	6.3e-289
Soltu.Atl_v3.02_3G021220.3	Soltu.Atl_v3.02_3G021220			B3	PF02362	B3 DNA binding domain	1.6e-29	101.7	PGSC0003DMP400021619	98	6.3e-289
Soltu.Atl_v3.11_3G020380.2	Soltu.Atl_v3.11_3G020380			MYB	PF00249	Myb-like DNA-binding domain	1.6e-29	101.7	PGSC0003DMP400047694	97.9	0
Soltu.Atl_v3.11_4G020200.6	Soltu.Atl_v3.11_4G020200			MYB	PF00249	Myb-like DNA-binding domain	1.6e-29	101.7	PGSC0003DMP400027224	94.2	1.26e-132
Soltu.Atl_v3.08_1G019600.2	Soltu.Atl_v3.08_1G019600			B3	PF02362	B3 DNA binding domain	1.5e-29	101.7	PGSC0003DMP400021619	100	1.97e-283
MSTRG.18230.2	Soltu.Atl_v3.02_4G022700			TCP	PF03634	TCP family transcription factor	4.7e-29	101.8	PGSC0003DMP400002458	67.8	3.22e-118
MSTRG.845.1	Soltu.Atl_v3.01_0G016040			ZF-HD	PF04770	ZF-HD protein dimerisation region	1.6e-29	101.8	PGSC0003DMP400036024	100	6.1e-220
Soltu.Atl_v3.06_0G001990.2	Soltu.Atl_v3.06_0G001990			MYB	PF00249	Myb-like DNA-binding domain	1.4e-29	101.8	PGSC0003DMP400019223	98.3	6.81e-115
Soltu.Atl_v3.08_0G004500.3	Soltu.Atl_v3.08_0G004500			B3	PF02362	B3 DNA binding domain	1.4e-29	101.8	PGSC0003DMP400016861	65.7	7.63e-218
Soltu.Atl_v3.08_1G019600.4	Soltu.Atl_v3.08_1G019600			B3	PF02362	B3 DNA binding domain	1.4e-29	101.8	PGSC0003DMP400021619	100	5.64e-292
Soltu.Atl_v3.08_1G019600.5	Soltu.Atl_v3.08_1G019600			B3	PF02362	B3 DNA binding domain	1.4e-29	101.8	PGSC0003DMP400021619	100	5.64e-292
Soltu.Atl_v3.09_0G005080.2	Soltu.Atl_v3.09_0G005080			MYB	PF00249	Myb-like DNA-binding domain	1.4e-29	101.8	PGSC0003DMP400006918	96	1.54e-215
Soltu.Atl_v3.09_4G003200.2	Soltu.Atl_v3.09_4G003200			MYB	PF00249	Myb-like DNA-binding domain	1.4e-29	101.8	PGSC0003DMP400006918	96	1.54e-215
Soltu.Atl_v3.11_1G019210.6	Soltu.Atl_v3.11_1G019210			MYB	PF00249	Myb-like DNA-binding domain	1.4e-29	101.8	PGSC0003DMP400027224	94.2	1.26e-132
Soltu.Atl_v3.12_3G010240.1	Soltu.Atl_v3.12_3G010240			NAC	PF02365	No apical meristem (NAM) protein	2.3e-29	101.9	PGSC0003DMP400009522	98.2	8.08e-233
Soltu.Atl_v3.02_4G018310.1	Soltu.Atl_v3.02_4G018310			ZF-HD	PF04770	ZF-HD protein dimerisation region	1.5e-29	101.9	PGSC0003DMP400006253	97.7	1.09e-216
MSTRG.38638.6	Soltu.Atl_v3.05_4G005590			MYB	PF00249	Myb-like DNA-binding domain	1.4e-29	101.9	PGSC0003DMP400046480	62	7.39e-84
MSTRG.38266.1	Soltu.Atl_v3.05_3G024080			NAC	PF02365	No apical meristem (NAM) protein	2.2e-29	102	PGSC0003DMP400040416	100	4.38e-63
Soltu.Atl_v3.12_2G013290.1	Soltu.Atl_v3.12_2G013290			NAC	PF02365	No apical meristem (NAM) protein	2.2e-29	102	PGSC0003DMP400009522	94	1.95e-227
Soltu.Atl_v3.02_2G024800.1	Soltu.Atl_v3.02_2G024800			ZF-HD	PF04770	ZF-HD protein dimerisation region	1.4e-29	102	PGSC0003DMP400006253	92.4	1.63e-202
Soltu.Atl_v3.10_2G008800.1	Soltu.Atl_v3.10_2G008800			ARF	PF06507	Auxin response factor	1.4e-29	102	PGSC0003DMP400037382	59.3	2.18e-266
Soltu.Atl_v3.11_2G015120.6	Soltu.Atl_v3.11_2G015120			MYB	PF00249	Myb-like DNA-binding domain	1.3e-29	102	PGSC0003DMP400027224	94.2	1.26e-132
MSTRG.30356.10	Soltu.Atl_v3.04_2G017970			B3	PF02362	B3 DNA binding domain	1.2e-29	102	Sopen04g033170.1	95.8	7.92e-255
MSTRG.31952.8	Soltu.Atl_v3.04_3G019500			B3	PF02362	B3 DNA binding domain	1.2e-29	102	Sopen04g033170.1	95.8	7.92e-255
MSTRG.65000.4	Soltu.Atl_v3.10_0G010210			MYB	PF00249	Myb-like DNA-binding domain	1.2e-29	102	Solyc10g086290.1.1	88.8	2.76e-175
Soltu.Atl_v3.12_1G005070.1	Soltu.Atl_v3.12_1G005070			NAC	PF02365	No apical meristem (NAM) protein	2e-29	102.1	PGSC0003DMP400009522	97.6	2.32e-232
Soltu.Atl_v3.02_1G014690.1	Soltu.Atl_v3.02_1G014690			HSF	PF00447	HSF-type DNA-binding	1.8e-29	102.1	PGSC0003DMP400051767	99	4.06e-139
Soltu.Atl_v3.02_2G017580.1	Soltu.Atl_v3.02_2G017580			HSF	PF00447	HSF-type DNA-binding	1.8e-29	102.1	PGSC0003DMP400051767	97.5	3.9e-135
Soltu.Atl_v3.02_3G018160.1	Soltu.Atl_v3.02_3G018160			HSF	PF00447	HSF-type DNA-binding	1.8e-29	102.1	PGSC0003DMP400051767	100	2.45e-140
Soltu.Atl_v3.02_4G015450.1	Soltu.Atl_v3.02_4G015450			HSF	PF00447	HSF-type DNA-binding	1.8e-29	102.1	PGSC0003DMP400051767	100	2.45e-140
MSTRG.9221.1	Soltu.Atl_v3.01_4G029190			ZF-HD	PF04770	ZF-HD protein dimerisation region	1.4e-29	102.1	PGSC0003DMP400036024	99	2.38e-217
Soltu.Atl_v3.01_3G027380.1	Soltu.Atl_v3.01_3G027380			ZF-HD	PF04770	ZF-HD protein dimerisation region	1.4e-29	102.1	PGSC0003DMP400036024	98.6	4.81e-215
Soltu.Atl_v3.02_1G027710.1	Soltu.Atl_v3.02_1G027710			MIKC	PF01486	K-box region	1.2e-29	102.1	PGSC0003DMP400002482	99.4	6.15e-115
Soltu.Atl_v3.02_2G030860.1	Soltu.Atl_v3.02_2G030860			MIKC	PF01486	K-box region	1.2e-29	102.1	PGSC0003DMP400002482	99.4	6.15e-115
Soltu.Atl_v3.09_2G013000.1	Soltu.Atl_v3.09_2G013000			MYB	PF00249	Myb-like DNA-binding domain	1.2e-29	102.1	PGSC0003DMP400034798	96.9	9.02e-178
Soltu.Atl_v3.06_1G017850.1	Soltu.Atl_v3.06_1G017850			MYB	PF00249	Myb-like DNA-binding domain	1.1e-29	102.1	PGSC0003DMP400034798	95.7	1.55e-177
Soltu.Atl_v3.08_1G002510.1	Soltu.Atl_v3.08_1G002510			B3	PF02362	B3 DNA binding domain	1.1e-29	102.1	PGSC0003DMP400010384	93.4	1.16e-214
Soltu.Atl_v3.08_2G020740.1	Soltu.Atl_v3.08_2G020740			B3	PF02362	B3 DNA binding domain	1.1e-29	102.1	PGSC0003DMP400021619	98.4	2.51e-220
Soltu.Atl_v3.12_3G022450.1	Soltu.Atl_v3.12_3G022450			HSF	PF00447	HSF-type DNA-binding	1.7e-29	102.2	PGSC0003DMP400000756	97	8.24e-222
Soltu.Atl_v3.02_4G022340.2	Soltu.Atl_v3.02_4G022340			MIKC	PF01486	K-box region	1.2e-29	102.2	PGSC0003DMP400002482	100	5.26e-116
Soltu.Atl_v3.05_2G005030.1	Soltu.Atl_v3.05_2G005030			ZF-HD	PF04770	ZF-HD protein dimerisation region	1.2e-29	102.3	PGSC0003DMP400054468	90.7	3.04e-167
Soltu.Atl_v3.02_4G008490.1	Soltu.Atl_v3.02_4G008490			B3	PF02362	B3 DNA binding domain	9.9e-30	102.3	PGSC0003DMP400004999	98.8	2.45e-240
Soltu.Atl_v3.02_4G008490.3	Soltu.Atl_v3.02_4G008490			B3	PF02362	B3 DNA binding domain	9.9e-30	102.3	PGSC0003DMP400004999	98.8	2.45e-240
Soltu.Atl_v3.02_4G008490.2	Soltu.Atl_v3.02_4G008490			B3	PF02362	B3 DNA binding domain	9.7e-30	102.3	PGSC0003DMP400004999	97.6	5.48e-236
Soltu.Atl_v3.03_0G001900.1	Soltu.Atl_v3.03_0G001900			MYB	PF00249	Myb-like DNA-binding domain	9.7e-30	102.3	PGSC0003DMP400014629	100	7.57e-128
Soltu.Atl_v3.S045330.1	Soltu.Atl_v3.S045330			MYB	PF00249	Myb-like DNA-binding domain	9.7e-30	102.3	PGSC0003DMP400014629	100	7.57e-128
Soltu.Atl_v3.08_2G001510.1	Soltu.Atl_v3.08_2G001510			B3	PF02362	B3 DNA binding domain	9.6e-30	102.3	PGSC0003DMP400010384	100	1.58e-235
Soltu.Atl_v3.08_3G003300.1	Soltu.Atl_v3.08_3G003300			B3	PF02362	B3 DNA binding domain	9.6e-30	102.3	PGSC0003DMP400010384	100	1.58e-235
Soltu.Atl_v3.08_3G003340.1	Soltu.Atl_v3.08_3G003340			B3	PF02362	B3 DNA binding domain	9.6e-30	102.3	PGSC0003DMP400010384	100	1.58e-235
Soltu.Atl_v3.02_2G027060.1	Soltu.Atl_v3.02_2G027060			MYB	PF00249	Myb-like DNA-binding domain	9.3e-30	102.4	PGSC0003DMP400037090	96.4	2.34e-235
Soltu.Atl_v3.02_0G002630.1	Soltu.Atl_v3.02_0G002630			MYB	PF00249	Myb-like DNA-binding domain	9.1e-30	102.4	PGSC0003DMP400037090	100	2.56e-245
Soltu.Atl_v3.02_1G025330.1	Soltu.Atl_v3.02_1G025330			MYB	PF00249	Myb-like DNA-binding domain	9.1e-30	102.4	PGSC0003DMP400037090	99.7	2.99e-244
Soltu.Atl_v3.02_3G028180.1	Soltu.Atl_v3.02_3G028180			MYB	PF00249	Myb-like DNA-binding domain	9.1e-30	102.4	PGSC0003DMP400037090	100	2.56e-245
Soltu.Atl_v3.08_2G018450.1	Soltu.Atl_v3.08_2G018450			TCP	PF03634	TCP family transcription factor	3e-29	102.5	PGSC0003DMP400039421	96.3	1.94e-247
Soltu.Atl_v3.02_2G031120.1	Soltu.Atl_v3.02_2G031120			TCP	PF03634	TCP family transcription factor	2.9e-29	102.5	PGSC0003DMP400002458	66.2	6.72e-111
Soltu.Atl_v3.08_1G000630.1	Soltu.Atl_v3.08_1G000630			MYB	PF00249	Myb-like DNA-binding domain	8.8e-30	102.5	PGSC0003DMP400057504	92.3	5.09e-105
Soltu.Atl_v3.12_2G002700.1	Soltu.Atl_v3.12_2G002700			MYB	PF00249	Myb-like DNA-binding domain	8.4e-30	102.5	PGSC0003DMP400008158	92.3	1.38e-148
Soltu.Atl_v3.04_3G011750.1	Soltu.Atl_v3.04_3G011750			B3	PF02362	B3 DNA binding domain	8.2e-30	102.5	PGSC0003DMP400043067	100	2.16e-188
Soltu.Atl_v3.08_1G016350.1	Soltu.Atl_v3.08_1G016350			TCP	PF03634	TCP family transcription factor	2.8e-29	102.6	PGSC0003DMP400039421	96.3	1.08e-248
Soltu.Atl_v3.08_4G016770.1	Soltu.Atl_v3.08_4G016770			NAC	PF02365	No apical meristem (NAM) protein	1.4e-29	102.6	PGSC0003DMP400030569	95.9	6.1e-245
Soltu.Atl_v3.12_3G001640.1	Soltu.Atl_v3.12_3G001640			CAMTA	PF03859	CG-1 domain	9.8e-30	102.6	Sopen12g034010.1	95.6	0
Soltu.Atl_v3.02_1G030950.1	Soltu.Atl_v3.02_1G030950			MYB	PF00249	Myb-like DNA-binding domain	8.3e-30	102.6	PGSC0003DMP400022407	96.8	1.57e-179
Soltu.Atl_v3.02_3G033390.1	Soltu.Atl_v3.02_3G033390			MYB	PF00249	Myb-like DNA-binding domain	8e-30	102.6	PGSC0003DMP400022407	97.6	3.32e-180
Soltu.Atl_v3.08_2G001500.1	Soltu.Atl_v3.08_2G001500			B3	PF02362	B3 DNA binding domain	7.7e-30	102.6	PGSC0003DMP400010383	100	3.02e-220
Soltu.Atl_v3.12_1G009200.1	Soltu.Atl_v3.12_1G009200			HSF	PF00447	HSF-type DNA-binding	1.1e-29	102.7	PGSC0003DMP400000756	98.9	7.71e-225
Soltu.Atl_v3.12_2G023790.1	Soltu.Atl_v3.12_2G023790			HSF	PF00447	HSF-type DNA-binding	1.1e-29	102.7	PGSC0003DMP400000756	98.1	5.19e-223
Soltu.Atl_v3.12_4G011980.1	Soltu.Atl_v3.12_4G011980			HSF	PF00447	HSF-type DNA-binding	1.1e-29	102.7	PGSC0003DMP400000756	99.2	3.28e-226
Soltu.Atl_v3.04_2G019210.1	Soltu.Atl_v3.04_2G019210			ZF-HD	PF04770	ZF-HD protein dimerisation region	8.8e-30	102.7	PGSC0003DMP400006670	97.5	3.96e-162
Soltu.Atl_v3.04_3G020670.1	Soltu.Atl_v3.04_3G020670			ZF-HD	PF04770	ZF-HD protein dimerisation region	8.8e-30	102.7	PGSC0003DMP400006670	97.5	3.96e-162
Soltu.Atl_v3.04_1G020650.1	Soltu.Atl_v3.04_1G020650			ZF-HD	PF04770	ZF-HD protein dimerisation region	8.7e-30	102.7	PGSC0003DMP400006670	100	8.75e-166
Soltu.Atl_v3.04_4G020900.1	Soltu.Atl_v3.04_4G020900			ZF-HD	PF04770	ZF-HD protein dimerisation region	8.7e-30	102.7	PGSC0003DMP400006670	86.5	5.59e-144
Soltu.Atl_v3.08_0G011650.1	Soltu.Atl_v3.08_0G011650			AP2	PF00847	AP2 domain	8.1e-30	102.7	PGSC0003DMP400021524	49.2	2.37e-110
Soltu.Atl_v3.02_2G034210.1	Soltu.Atl_v3.02_2G034210			MYB	PF00249	Myb-like DNA-binding domain	7.8e-30	102.7	PGSC0003DMP400022407	98.4	1.16e-184
Soltu.Atl_v3.02_4G025580.1	Soltu.Atl_v3.02_4G025580			MYB	PF00249	Myb-like DNA-binding domain	7.8e-30	102.7	PGSC0003DMP400022407	100	1.71e-188
Soltu.Atl_v3.08_1G002500.1	Soltu.Atl_v3.08_1G002500			B3	PF02362	B3 DNA binding domain	7.2e-30	102.7	PGSC0003DMP400010383	99.3	4.62e-217
Soltu.Atl_v3.08_3G016050.1	Soltu.Atl_v3.08_3G016050			TCP	PF03634	TCP family transcription factor	2.4e-29	102.8	PGSC0003DMP400039421	96.6	1.37e-247
Soltu.Atl_v3.08_4G019770.1	Soltu.Atl_v3.08_4G019770			TCP	PF03634	TCP family transcription factor	2.4e-29	102.8	PGSC0003DMP400039421	96.6	1.37e-247
Soltu.Atl_v3.01_1G016840.1	Soltu.Atl_v3.01_1G016840			SBP	PF03110	SBP domain	7.7e-30	102.8	PGSC0003DMP400009226	99.5	0
Soltu.Atl_v3.01_2G020130.2	Soltu.Atl_v3.01_2G020130			SBP	PF03110	SBP domain	7.7e-30	102.8	PGSC0003DMP400009226	98.9	0
Soltu.Atl_v3.01_3G017030.1	Soltu.Atl_v3.01_3G017030			SBP	PF03110	SBP domain	7.7e-30	102.8	PGSC0003DMP400009226	97.6	0
Soltu.Atl_v3.01_4G019070.1	Soltu.Atl_v3.01_4G019070			SBP	PF03110	SBP domain	7.7e-30	102.8	PGSC0003DMP400009226	99	0
Soltu.Atl_v3.06_0G002130.1	Soltu.Atl_v3.06_0G002130			MYB	PF00249	Myb-like DNA-binding domain	7.2e-30	102.8	PGSC0003DMP400019227	96.7	6.36e-118
Soltu.Atl_v3.03_3G016110.1	Soltu.Atl_v3.03_3G016110			MYB	PF00249	Myb-like DNA-binding domain	7.1e-30	102.8	PGSC0003DMP400014629	87.2	3.64e-103
Soltu.Atl_v3.02_3G008800.1	Soltu.Atl_v3.02_3G008800			B3	PF02362	B3 DNA binding domain	7e-30	102.8	PGSC0003DMP400004999	99.4	1.08e-243
Soltu.Atl_v3.08_3G003290.1	Soltu.Atl_v3.08_3G003290			B3	PF02362	B3 DNA binding domain	6.9e-30	102.8	PGSC0003DMP400010383	100	3.02e-220
Soltu.Atl_v3.08_3G003330.1	Soltu.Atl_v3.08_3G003330			B3	PF02362	B3 DNA binding domain	6.8e-30	102.8	PGSC0003DMP400010383	100	3.02e-220
Soltu.Atl_v3.03_1G014120.1	Soltu.Atl_v3.03_1G014120			TCP	PF03634	TCP family transcription factor	2.2e-29	102.9	PGSC0003DMP400041960	94	1.68e-227
Soltu.Atl_v3.03_3G007790.1	Soltu.Atl_v3.03_3G007790			TCP	PF03634	TCP family transcription factor	2.2e-29	102.9	PGSC0003DMP400006021	95.8	4.4e-92
Soltu.Atl_v3.02_0G004120.2	Soltu.Atl_v3.02_0G004120			NAC	PF02365	No apical meristem (NAM) protein	1.2e-29	102.9	PGSC0003DMP400002396	89.5	7.13e-230
Soltu.Atl_v3.02_3G030920.1	Soltu.Atl_v3.02_3G030920			Dof	PF02701	Dof domain, zinc finger	6.5e-30	102.9	PGSC0003DMP400017726	88.6	8.11e-179
Soltu.Atl_v3.05_2G009490.1	Soltu.Atl_v3.05_2G009490			MYB	PF00249	Myb-like DNA-binding domain	6.5e-30	102.9	PGSC0003DMP400021198	98.6	8.52e-164
Soltu.Atl_v3.09_4G000090.1	Soltu.Atl_v3.09_4G000090			LBD (AS2/LOB)	PF03195	Protein of unknown function DUF260	8.2e-30	103	PGSC0003DMP400065207	71.8	4.57e-71
Soltu.Atl_v3.10_0G010430.1	Soltu.Atl_v3.10_0G010430			ARF	PF06507	Auxin response factor	7.1e-30	103	PGSC0003DMP400037382	58.2	8.36e-257
Soltu.Atl_v3.10_3G006460.2	Soltu.Atl_v3.10_3G006460			ARF	PF06507	Auxin response factor	6.7e-30	103	PGSC0003DMP400037382	58.1	1.72e-254
Soltu.Atl_v3.10_4G005690.2	Soltu.Atl_v3.10_4G005690			ARF	PF06507	Auxin response factor	6.7e-30	103	PGSC0003DMP400037382	58.1	1.72e-254
Soltu.Atl_v3.10_3G006460.1	Soltu.Atl_v3.10_3G006460			ARF	PF06507	Auxin response factor	6.6e-30	103	PGSC0003DMP400037382	58.1	9.37e-255
Soltu.Atl_v3.10_4G005690.1	Soltu.Atl_v3.10_4G005690			ARF	PF06507	Auxin response factor	6.6e-30	103	PGSC0003DMP400037382	58.1	9.37e-255
Soltu.Atl_v3.03_4G009570.1	Soltu.Atl_v3.03_4G009570			TCP	PF03634	TCP family transcription factor	1.9e-29	103.1	PGSC0003DMP400041960	94	4.43e-228
Soltu.Atl_v3.10_3G002420.1	Soltu.Atl_v3.10_3G002420			TCP	PF03634	TCP family transcription factor	1.9e-29	103.1	PGSC0003DMP400046265	89.9	2.77e-219
Soltu.Atl_v3.S143940.1	Soltu.Atl_v3.S143940			LBD (AS2/LOB)	PF03195	Protein of unknown function DUF260	7.5e-30	103.1	PGSC0003DMP400044029	94	9.21e-100
Soltu.Atl_v3.S158500.1	Soltu.Atl_v3.S158500			LBD (AS2/LOB)	PF03195	Protein of unknown function DUF260	7.5e-30	103.1	PGSC0003DMP400044029	94	9.21e-100
Soltu.Atl_v3.02_1G023050.1	Soltu.Atl_v3.02_1G023050			ZF-HD	PF04770	ZF-HD protein dimerisation region	6.7e-30	103.1	PGSC0003DMP400006253	100	3.03e-223
Soltu.Atl_v3.02_2G029240.1	Soltu.Atl_v3.02_2G029240			B3	PF02362	B3 DNA binding domain	5.5e-30	103.1	PGSC0003DMP400017857	96.4	6.96e-142
Soltu.Atl_v3.06_0G002150.1	Soltu.Atl_v3.06_0G002150			MYB	PF00249	Myb-like DNA-binding domain	5.5e-30	103.1	PGSC0003DMP400019223	98.8	1.95e-114
Soltu.Atl_v3.12_0G009810.1	Soltu.Atl_v3.12_0G009810			TCP	PF03634	TCP family transcription factor	1.7e-29	103.2	PGSC0003DMP400026962	92.8	1.34e-275
Soltu.Atl_v3.03_1G011520.1	Soltu.Atl_v3.03_1G011520			MYB	PF00249	Myb-like DNA-binding domain	5.3e-30	103.2	PGSC0003DMP400014630	86	2.29e-106
Soltu.Atl_v3.03_2G012260.1	Soltu.Atl_v3.03_2G012260			TCP	PF03634	TCP family transcription factor	1.7e-29	103.3	PGSC0003DMP400041960	93.2	1.3e-228
Soltu.Atl_v3.03_3G018640.1	Soltu.Atl_v3.03_3G018640			TCP	PF03634	TCP family transcription factor	1.6e-29	103.3	PGSC0003DMP400041960	94	1.77e-228
Soltu.Atl_v3.S119640.1	Soltu.Atl_v3.S119640			NAC	PF02365	No apical meristem (NAM) protein	8.7e-30	103.3	PGSC0003DMP400030569	93.2	3.29e-233
Soltu.Atl_v3.08_4G016770.2	Soltu.Atl_v3.08_4G016770			NAC	PF02365	No apical meristem (NAM) protein	8.6e-30	103.3	PGSC0003DMP400030570	95.9	7.58e-186
Soltu.Atl_v3.02_3G026070.1	Soltu.Atl_v3.02_3G026070			ZF-HD	PF04770	ZF-HD protein dimerisation region	5.8e-30	103.3	PGSC0003DMP400006253	97	4.96e-213
Soltu.Atl_v3.10_0G002840.1	Soltu.Atl_v3.10_0G002840			MYB	PF00249	Myb-like DNA-binding domain	4.8e-30	103.3	PGSC0003DMP400027651	99.5	4.48e-294
Soltu.Atl_v3.10_1G006390.1	Soltu.Atl_v3.10_1G006390			MYB	PF00249	Myb-like DNA-binding domain	4.8e-30	103.3	PGSC0003DMP400027651	100	1.34e-295
Soltu.Atl_v3.S030440.1	Soltu.Atl_v3.S030440			MYB	PF00249	Myb-like DNA-binding domain	4.8e-30	103.3	PGSC0003DMP400027651	99.5	4.48e-294
Soltu.Atl_v3.S030490.1	Soltu.Atl_v3.S030490			MYB	PF00249	Myb-like DNA-binding domain	4.8e-30	103.3	PGSC0003DMP400027651	99.5	4.48e-294
MSTRG.71765.1	Soltu.Atl_v3.11_3G002180			C3H	PF00642	Zinc finger C-x8-C-x5-C-x3-H type (and similar)	3.1e-30	103.3	PGSC0003DMP400028357	100	1.43e-196
MSTRG.71765.12	Soltu.Atl_v3.11_3G002180			C3H	PF00642	Zinc finger C-x8-C-x5-C-x3-H type (and similar)	3.1e-30	103.3	PGSC0003DMP400028357	100	1.43e-196
MSTRG.71765.15	Soltu.Atl_v3.11_3G002180			C3H	PF00642	Zinc finger C-x8-C-x5-C-x3-H type (and similar)	3.1e-30	103.3	PGSC0003DMP400028357	100	1.43e-196
Soltu.Atl_v3.11_1G002470.3	Soltu.Atl_v3.11_1G002470			C3H	PF00642	Zinc finger C-x8-C-x5-C-x3-H type (and similar)	3.1e-30	103.3	PGSC0003DMP400028357	100	1.43e-196
Soltu.Atl_v3.11_2G001710.3	Soltu.Atl_v3.11_2G001710			C3H	PF00642	Zinc finger C-x8-C-x5-C-x3-H type (and similar)	3.1e-30	103.3	PGSC0003DMP400028357	100	1.43e-196
Soltu.Atl_v3.11_3G002180.6	Soltu.Atl_v3.11_3G002180			C3H	PF00642	Zinc finger C-x8-C-x5-C-x3-H type (and similar)	3.1e-30	103.3	PGSC0003DMP400028357	100	1.43e-196
Soltu.Atl_v3.11_3G002180.7	Soltu.Atl_v3.11_3G002180			C3H	PF00642	Zinc finger C-x8-C-x5-C-x3-H type (and similar)	3.1e-30	103.3	PGSC0003DMP400028357	100	1.43e-196
Soltu.Atl_v3.02_3G004890.3	Soltu.Atl_v3.02_3G004890			ARF	PF06507	Auxin response factor	5.2e-30	103.4	PGSC0003DMP400032529	72.8	0
Soltu.Atl_v3.03_4G018450.3	Soltu.Atl_v3.03_4G018450			MYB	PF00249	Myb-like DNA-binding domain	4.7e-30	103.4	PGSC0003DMP400031557	99.4	2e-235
Soltu.Atl_v3.12_2G024540.1	Soltu.Atl_v3.12_2G024540			MYB	PF00249	Myb-like DNA-binding domain	4.6e-30	103.4	PGSC0003DMP400000691	95.8	1.44e-194
Soltu.Atl_v3.03_2G019790.4	Soltu.Atl_v3.03_2G019790			MYB	PF00249	Myb-like DNA-binding domain	4.5e-30	103.4	PGSC0003DMP400031557	97.8	2.24e-232
Soltu.Atl_v3.06_2G000080.1	Soltu.Atl_v3.06_2G000080			MYB	PF00249	Myb-like DNA-binding domain	4.5e-30	103.4	PGSC0003DMP400012935	91.6	1.2e-201
Soltu.Atl_v3.02_1G008060.1	Soltu.Atl_v3.02_1G008060			TCP	PF03634	TCP family transcription factor	1.4e-29	103.6	PGSC0003DMP400046170	88.8	3.34e-132
Soltu.Atl_v3.02_1G008060.2	Soltu.Atl_v3.02_1G008060			TCP	PF03634	TCP family transcription factor	1.4e-29	103.6	PGSC0003DMP400046170	88.8	3.34e-132
Soltu.Atl_v3.06_0G012160.1	Soltu.Atl_v3.06_0G012160			NAC	PF02365	No apical meristem (NAM) protein	7e-30	103.6	PGSC0003DMP400030569	71.8	6.09e-173
Soltu.Atl_v3.06_0G012360.1	Soltu.Atl_v3.06_0G012360			NAC	PF02365	No apical meristem (NAM) protein	7e-30	103.6	PGSC0003DMP400030569	71.8	6.09e-173
Soltu.Atl_v3.09_2G000090.1	Soltu.Atl_v3.09_2G000090			LBD (AS2/LOB)	PF03195	Protein of unknown function DUF260	5.4e-30	103.6	PGSC0003DMP400065207	71.2	9.21e-71
Soltu.Atl_v3.04_3G015700.1	Soltu.Atl_v3.04_3G015700			ZF-HD	PF04770	ZF-HD protein dimerisation region	4.5e-30	103.6	PGSC0003DMP400022870	95.8	1.55e-160
Soltu.Atl_v3.06_2G000270.1	Soltu.Atl_v3.06_2G000270			MYB	PF00249	Myb-like DNA-binding domain	3.9e-30	103.6	Solyc06g009480.1.1	85.1	3.23e-148
Soltu.Atl_v3.08_1G000630.2	Soltu.Atl_v3.08_1G000630			MYB	PF00249	Myb-like DNA-binding domain	3.9e-30	103.6	PGSC0003DMP400057504	87.4	2.08e-104
Soltu.Atl_v3.09_2G010810.1	Soltu.Atl_v3.09_2G010810			HSF	PF00447	HSF-type DNA-binding	5.4e-30	103.7	PGSC0003DMP400030540	99.2	1.68e-271
Soltu.Atl_v3.06_4G000330.1	Soltu.Atl_v3.06_4G000330			MYB	PF00249	Myb-like DNA-binding domain	3.7e-30	103.7	Solyc06g009480.1.1	85.1	2.36e-148
Soltu.Atl_v3.12_0G009100.1	Soltu.Atl_v3.12_0G009100			TCP	PF03634	TCP family transcription factor	1.1e-29	103.8	PGSC0003DMP400026962	92.6	2.92e-276
MSTRG.7532.1	Soltu.Atl_v3.01_3G037260			FAR1	PF03101	FAR1 DNA-binding domain	5.5e-30	103.8	Sopen01g054420.1	97.8	0
MSTRG.7532.3	Soltu.Atl_v3.01_3G037260			FAR1	PF03101	FAR1 DNA-binding domain	5.5e-30	103.8	Sopen01g054420.1	97.4	0
MSTRG.7532.4	Soltu.Atl_v3.01_3G037260			FAR1	PF03101	FAR1 DNA-binding domain	5.5e-30	103.8	Sopen01g054420.1	97.8	0
Soltu.Atl_v3.06_0G011150.2	Soltu.Atl_v3.06_0G011150			HSF	PF00447	HSF-type DNA-binding	5.3e-30	103.8	PGSC0003DMP400028424	95.1	2.86e-224
Soltu.Atl_v3.09_4G012730.1	Soltu.Atl_v3.09_4G012730			HSF	PF00447	HSF-type DNA-binding	5.3e-30	103.8	PGSC0003DMP400030540	99.5	3.38e-271
Soltu.Atl_v3.06_0G009070.3	Soltu.Atl_v3.06_0G009070			HSF	PF00447	HSF-type DNA-binding	5.2e-30	103.8	PGSC0003DMP400028424	93.9	6.46e-223
Soltu.Atl_v3.06_0G010590.3	Soltu.Atl_v3.06_0G010590			HSF	PF00447	HSF-type DNA-binding	5.2e-30	103.8	PGSC0003DMP400028424	93.9	6.46e-223
Soltu.Atl_v3.06_2G027130.3	Soltu.Atl_v3.06_2G027130			ARF	PF06507	Auxin response factor	3.8e-30	103.8	Sopen06g031560.1	86.9	0
Soltu.Atl_v3.06_3G020830.3	Soltu.Atl_v3.06_3G020830			ARF	PF06507	Auxin response factor	3.8e-30	103.8	Sopen06g031560.1	86.9	0
Soltu.Atl_v3.03_2G019790.1	Soltu.Atl_v3.03_2G019790			MYB	PF00249	Myb-like DNA-binding domain	3.5e-30	103.8	PGSC0003DMP400031557	89.2	8.34e-207
Soltu.Atl_v3.09_1G005080.1	Soltu.Atl_v3.09_1G005080			HSF	PF00447	HSF-type DNA-binding	5e-30	103.9	PGSC0003DMP400030540	99.7	2.04e-272
Soltu.Atl_v3.09_3G013760.1	Soltu.Atl_v3.09_3G013760			HSF	PF00447	HSF-type DNA-binding	5e-30	103.9	PGSC0003DMP400030540	99.7	2.04e-272
Soltu.Atl_v3.09_2G017590.1	Soltu.Atl_v3.09_2G017590			ZF-HD	PF04770	ZF-HD protein dimerisation region	3.8e-30	103.9	PGSC0003DMP400030027	99.6	0
Soltu.Atl_v3.09_4G019560.1	Soltu.Atl_v3.09_4G019560			ZF-HD	PF04770	ZF-HD protein dimerisation region	3.8e-30	103.9	PGSC0003DMP400030027	96	0
Soltu.Atl_v3.09_4G019560.2	Soltu.Atl_v3.09_4G019560			ZF-HD	PF04770	ZF-HD protein dimerisation region	3.8e-30	103.9	PGSC0003DMP400030027	96.3	0
Soltu.Atl_v3.06_2G027130.1	Soltu.Atl_v3.06_2G027130			ARF	PF06507	Auxin response factor	3.5e-30	103.9	Sopen06g031560.1	91.4	0
Soltu.Atl_v3.06_3G020830.1	Soltu.Atl_v3.06_3G020830			ARF	PF06507	Auxin response factor	3.5e-30	103.9	Sopen06g031560.1	91.4	0
Soltu.Atl_v3.08_0G005800.1	Soltu.Atl_v3.08_0G005800			MYB	PF00249	Myb-like DNA-binding domain	3.1e-30	103.9	PGSC0003DMP400057504	93.5	2.14e-106
Soltu.Atl_v3.10_4G005200.1	Soltu.Atl_v3.10_4G005200			GRAS	PF03514	GRAS domain family	7.6e-30	104	PGSC0003DMP400033378	75.7	5.02e-57
Soltu.Atl_v3.S119640.2	Soltu.Atl_v3.S119640			NAC	PF02365	No apical meristem (NAM) protein	5.3e-30	104	PGSC0003DMP400030570	94	4.31e-179
MSTRG.1188.1	Soltu.Atl_v3.01_0G020850			FAR1	PF03101	FAR1 DNA-binding domain	5e-30	104	Sopen01g054420.1	98.2	0
MSTRG.1188.2	Soltu.Atl_v3.01_0G020850			FAR1	PF03101	FAR1 DNA-binding domain	5e-30	104	Sopen01g054420.1	97.7	0
Soltu.Atl_v3.09_1G010980.1	Soltu.Atl_v3.09_1G010980			ZF-HD	PF04770	ZF-HD protein dimerisation region	3.5e-30	104	PGSC0003DMP400030027	96.4	0
Soltu.Atl_v3.06_2G027130.2	Soltu.Atl_v3.06_2G027130			ARF	PF06507	Auxin response factor	3.4e-30	104	Sopen06g031560.1	91.3	0
Soltu.Atl_v3.06_3G020830.2	Soltu.Atl_v3.06_3G020830			ARF	PF06507	Auxin response factor	3.4e-30	104	Sopen06g031560.1	91.3	0
Soltu.Atl_v3.07_4G016190.1	Soltu.Atl_v3.07_4G016190			MYB	PF00249	Myb-like DNA-binding domain	2.9e-30	104	PGSC0003DMP400045417	96.7	1.51e-173
Soltu.Atl_v3.08_0G005430.1	Soltu.Atl_v3.08_0G005430			MYB	PF00249	Myb-like DNA-binding domain	2.9e-30	104	PGSC0003DMP400057504	94.1	3.38e-110
Soltu.Atl_v3.12_3G020380.1	Soltu.Atl_v3.12_3G020380			MYB	PF00249	Myb-like DNA-binding domain	2.9e-30	104	PGSC0003DMP400024309	97	2.16e-167
Soltu.Atl_v3.02_4G008970.2	Soltu.Atl_v3.02_4G008970			TCP	PF03634	TCP family transcription factor	9.3e-30	104.1	PGSC0003DMP400046169	90.9	1.3e-94
Soltu.Atl_v3.01_2G020130.3	Soltu.Atl_v3.01_2G020130			SBP	PF03110	SBP domain	3.1e-30	104.1	PGSC0003DMP400009226	99.1	0
Soltu.Atl_v3.07_1G012120.1	Soltu.Atl_v3.07_1G012120			MYB	PF00249	Myb-like DNA-binding domain	2.8e-30	104.1	PGSC0003DMP400045417	93.5	2.23e-169
Soltu.Atl_v3.03_3G027810.1	Soltu.Atl_v3.03_3G027810			MYB	PF00249	Myb-like DNA-binding domain	2.7e-30	104.1	PGSC0003DMP400031557	99.4	1.41e-235
Soltu.Atl_v3.07_1G012430.10	Soltu.Atl_v3.07_1G012430			B3	PF02362	B3 DNA binding domain	2.7e-30	104.1	PGSC0003DMP400032011	90.5	1.02e-210
Soltu.Atl_v3.08_0G003520.1	Soltu.Atl_v3.08_0G003520			B3	PF02362	B3 DNA binding domain	2.7e-30	104.1	Solyc08g006210.1.1	76.3	1.3e-214
Soltu.Atl_v3.06_2G011780.1	Soltu.Atl_v3.06_2G011780			HSF	PF00447	HSF-type DNA-binding	3.9e-30	104.2	PGSC0003DMP400028424	95.2	8.08e-232
MSTRG.3921.6	Soltu.Atl_v3.01_2G020130			SBP	PF03110	SBP domain	2.9e-30	104.2	PGSC0003DMP400009226	98.4	0
Soltu.Atl_v3.04_0G002990.3	Soltu.Atl_v3.04_0G002990			SBP	PF03110	SBP domain	2.9e-30	104.2	Solyc04g045560.2.1	63.3	1.24e-133
Soltu.Atl_v3.01_1G021950.1	Soltu.Atl_v3.01_1G021950			MIKC	PF01486	K-box region	2.8e-30	104.2	PGSC0003DMP400000297	100	2.23e-181
Soltu.Atl_v3.01_2G025100.1	Soltu.Atl_v3.01_2G025100			MIKC	PF01486	K-box region	2.8e-30	104.2	PGSC0003DMP400000297	100	2.23e-181
Soltu.Atl_v3.01_3G020570.1	Soltu.Atl_v3.01_3G020570			MIKC	PF01486	K-box region	2.8e-30	104.2	PGSC0003DMP400000297	100	2.23e-181
MSTRG.38456.2	Soltu.Atl_v3.05_4G002440			RAV	PF02362	B3 DNA binding domain	2.6e-30	104.2	PGSC0003DMP400001547	99.5	2.13e-274
MSTRG.38456.2	Soltu.Atl_v3.05_4G002440			B3	PF02362	B3 DNA binding domain	2.6e-30	104.2	PGSC0003DMP400001547	99.5	2.13e-274
MSTRG.38456.3	Soltu.Atl_v3.05_4G002440			RAV	PF02362	B3 DNA binding domain	2.6e-30	104.2	PGSC0003DMP400001547	99.5	2.13e-274
MSTRG.38456.3	Soltu.Atl_v3.05_4G002440			B3	PF02362	B3 DNA binding domain	2.6e-30	104.2	PGSC0003DMP400001547	99.5	2.13e-274
MSTRG.38456.4	Soltu.Atl_v3.05_4G002440			RAV	PF02362	B3 DNA binding domain	2.6e-30	104.2	PGSC0003DMP400001547	99.5	2.13e-274
MSTRG.38456.4	Soltu.Atl_v3.05_4G002440			B3	PF02362	B3 DNA binding domain	2.6e-30	104.2	PGSC0003DMP400001547	99.5	2.13e-274
Soltu.Atl_v3.05_2G002050.1	Soltu.Atl_v3.05_2G002050			RAV	PF02362	B3 DNA binding domain	2.6e-30	104.2	PGSC0003DMP400001547	98	3e-271
Soltu.Atl_v3.05_2G002050.1	Soltu.Atl_v3.05_2G002050			B3	PF02362	B3 DNA binding domain	2.6e-30	104.2	PGSC0003DMP400001547	98	3e-271
MSTRG.34259.1	Soltu.Atl_v3.05_1G001950			RAV	PF02362	B3 DNA binding domain	2.5e-30	104.2	PGSC0003DMP400001547	99.2	1.23e-273
MSTRG.34259.1	Soltu.Atl_v3.05_1G001950			B3	PF02362	B3 DNA binding domain	2.5e-30	104.2	PGSC0003DMP400001547	99.2	1.23e-273
MSTRG.37203.1	Soltu.Atl_v3.05_3G002450			RAV	PF02362	B3 DNA binding domain	2.5e-30	104.2	PGSC0003DMP400001547	97.8	5.58e-268
MSTRG.37203.1	Soltu.Atl_v3.05_3G002450			B3	PF02362	B3 DNA binding domain	2.5e-30	104.2	PGSC0003DMP400001547	97.8	5.58e-268
MSTRG.37203.2	Soltu.Atl_v3.05_3G002450			RAV	PF02362	B3 DNA binding domain	2.5e-30	104.2	PGSC0003DMP400001547	97.8	5.58e-268
MSTRG.37203.2	Soltu.Atl_v3.05_3G002450			B3	PF02362	B3 DNA binding domain	2.5e-30	104.2	PGSC0003DMP400001547	97.8	5.58e-268
MSTRG.37203.3	Soltu.Atl_v3.05_3G002450			RAV	PF02362	B3 DNA binding domain	2.5e-30	104.2	PGSC0003DMP400001547	97.8	5.58e-268
MSTRG.37203.3	Soltu.Atl_v3.05_3G002450			B3	PF02362	B3 DNA binding domain	2.5e-30	104.2	PGSC0003DMP400001547	97.8	5.58e-268
MSTRG.37203.4	Soltu.Atl_v3.05_3G002450			RAV	PF02362	B3 DNA binding domain	2.5e-30	104.2	PGSC0003DMP400001547	97.8	5.58e-268
MSTRG.37203.4	Soltu.Atl_v3.05_3G002450			B3	PF02362	B3 DNA binding domain	2.5e-30	104.2	PGSC0003DMP400001547	97.8	5.58e-268
MSTRG.37203.5	Soltu.Atl_v3.05_3G002450			RAV	PF02362	B3 DNA binding domain	2.5e-30	104.2	PGSC0003DMP400001547	97.8	5.58e-268
MSTRG.37203.5	Soltu.Atl_v3.05_3G002450			B3	PF02362	B3 DNA binding domain	2.5e-30	104.2	PGSC0003DMP400001547	97.8	5.58e-268
MSTRG.37203.6	Soltu.Atl_v3.05_3G002450			RAV	PF02362	B3 DNA binding domain	2.5e-30	104.2	PGSC0003DMP400001547	97.8	5.58e-268
MSTRG.37203.6	Soltu.Atl_v3.05_3G002450			B3	PF02362	B3 DNA binding domain	2.5e-30	104.2	PGSC0003DMP400001547	97.8	5.58e-268
MSTRG.37203.7	Soltu.Atl_v3.05_3G002450			RAV	PF02362	B3 DNA binding domain	2.5e-30	104.2	PGSC0003DMP400001547	97.8	5.58e-268
MSTRG.37203.7	Soltu.Atl_v3.05_3G002450			B3	PF02362	B3 DNA binding domain	2.5e-30	104.2	PGSC0003DMP400001547	97.8	5.58e-268
Soltu.Atl_v3.03_2G005820.1	Soltu.Atl_v3.03_2G005820			TCP	PF03634	TCP family transcription factor	8.3e-30	104.3	PGSC0003DMP400006021	99.3	1.27e-97
Soltu.Atl_v3.03_1G005660.1	Soltu.Atl_v3.03_1G005660			TCP	PF03634	TCP family transcription factor	7.9e-30	104.3	PGSC0003DMP400006021	99.3	1.27e-97
Soltu.Atl_v3.12_0G008260.1	Soltu.Atl_v3.12_0G008260			TCP	PF03634	TCP family transcription factor	7.9e-30	104.3	PGSC0003DMP400026962	93	3.85e-278
MSTRG.7532.2	Soltu.Atl_v3.01_3G037270			FAR1	PF03101	FAR1 DNA-binding domain	4e-30	104.3	Sopen01g054420.1	97.7	0
Soltu.Atl_v3.09_4G019560.3	Soltu.Atl_v3.09_4G019560			ZF-HD	PF04770	ZF-HD protein dimerisation region	2.7e-30	104.3	PGSC0003DMP400030027	96.4	0
MSTRG.34854.1	Soltu.Atl_v3.05_1G011320			SBP	PF03110	SBP domain	2.6e-30	104.3	PGSC0003DMP400037933	99.7	1.06e-227
MSTRG.36171.6	Soltu.Atl_v3.05_2G010840			SBP	PF03110	SBP domain	2.6e-30	104.3	PGSC0003DMP400037933	99.4	1.5e-227
Soltu.Atl_v3.04_0G002990.2	Soltu.Atl_v3.04_0G002990			SBP	PF03110	SBP domain	2.6e-30	104.3	PGSC0003DMP400056411	51.1	2.67e-117
Soltu.Atl_v3.05_1G011320.1	Soltu.Atl_v3.05_1G011320			SBP	PF03110	SBP domain	2.6e-30	104.3	PGSC0003DMP400037933	99.7	1.06e-227
Soltu.Atl_v3.05_1G011320.2	Soltu.Atl_v3.05_1G011320			SBP	PF03110	SBP domain	2.6e-30	104.3	PGSC0003DMP400037933	99.7	1.06e-227
Soltu.Atl_v3.05_1G011320.3	Soltu.Atl_v3.05_1G011320			SBP	PF03110	SBP domain	2.6e-30	104.3	PGSC0003DMP400037933	99.7	1.06e-227
Soltu.Atl_v3.05_1G011320.4	Soltu.Atl_v3.05_1G011320			SBP	PF03110	SBP domain	2.6e-30	104.3	PGSC0003DMP400037933	99.7	1.06e-227
Soltu.Atl_v3.05_1G011320.5	Soltu.Atl_v3.05_1G011320			SBP	PF03110	SBP domain	2.6e-30	104.3	PGSC0003DMP400037933	99.7	1.06e-227
Soltu.Atl_v3.05_1G011320.6	Soltu.Atl_v3.05_1G011320			SBP	PF03110	SBP domain	2.6e-30	104.3	PGSC0003DMP400037933	99.7	1.06e-227
Soltu.Atl_v3.05_2G010840.1	Soltu.Atl_v3.05_2G010840			SBP	PF03110	SBP domain	2.6e-30	104.3	PGSC0003DMP400037933	99.4	1.5e-227
Soltu.Atl_v3.05_2G010840.2	Soltu.Atl_v3.05_2G010840			SBP	PF03110	SBP domain	2.6e-30	104.3	PGSC0003DMP400037933	99.4	1.5e-227
Soltu.Atl_v3.05_2G010840.3	Soltu.Atl_v3.05_2G010840			SBP	PF03110	SBP domain	2.6e-30	104.3	PGSC0003DMP400037933	99.4	1.5e-227
Soltu.Atl_v3.05_2G010840.4	Soltu.Atl_v3.05_2G010840			SBP	PF03110	SBP domain	2.6e-30	104.3	PGSC0003DMP400037933	99.4	1.5e-227
Soltu.Atl_v3.05_2G010840.5	Soltu.Atl_v3.05_2G010840			SBP	PF03110	SBP domain	2.6e-30	104.3	PGSC0003DMP400037933	99.4	1.5e-227
Soltu.Atl_v3.05_2G010840.6	Soltu.Atl_v3.05_2G010840			SBP	PF03110	SBP domain	2.6e-30	104.3	PGSC0003DMP400037933	99.4	1.5e-227
Soltu.Atl_v3.05_4G009020.1	Soltu.Atl_v3.05_4G009020			SBP	PF03110	SBP domain	2.6e-30	104.3	PGSC0003DMP400037933	98.7	4.63e-224
Soltu.Atl_v3.05_4G009020.10	Soltu.Atl_v3.05_4G009020			SBP	PF03110	SBP domain	2.6e-30	104.3	PGSC0003DMP400037933	98.7	4.63e-224
Soltu.Atl_v3.05_4G009020.11	Soltu.Atl_v3.05_4G009020			SBP	PF03110	SBP domain	2.6e-30	104.3	PGSC0003DMP400037933	98.7	4.63e-224
Soltu.Atl_v3.05_4G009020.12	Soltu.Atl_v3.05_4G009020			SBP	PF03110	SBP domain	2.6e-30	104.3	PGSC0003DMP400037933	98.7	4.63e-224
Soltu.Atl_v3.05_4G009020.2	Soltu.Atl_v3.05_4G009020			SBP	PF03110	SBP domain	2.6e-30	104.3	PGSC0003DMP400037933	98.7	4.63e-224
Soltu.Atl_v3.05_4G009020.3	Soltu.Atl_v3.05_4G009020			SBP	PF03110	SBP domain	2.6e-30	104.3	PGSC0003DMP400037933	98.7	4.63e-224
Soltu.Atl_v3.05_4G009020.4	Soltu.Atl_v3.05_4G009020			SBP	PF03110	SBP domain	2.6e-30	104.3	PGSC0003DMP400037933	98.7	4.63e-224
Soltu.Atl_v3.05_4G009020.5	Soltu.Atl_v3.05_4G009020			SBP	PF03110	SBP domain	2.6e-30	104.3	PGSC0003DMP400037933	98.7	4.63e-224
Soltu.Atl_v3.05_4G009020.6	Soltu.Atl_v3.05_4G009020			SBP	PF03110	SBP domain	2.6e-30	104.3	PGSC0003DMP400037933	98.7	4.63e-224
Soltu.Atl_v3.05_4G009020.7	Soltu.Atl_v3.05_4G009020			SBP	PF03110	SBP domain	2.6e-30	104.3	PGSC0003DMP400037933	98.7	4.63e-224
Soltu.Atl_v3.05_4G009020.8	Soltu.Atl_v3.05_4G009020			SBP	PF03110	SBP domain	2.6e-30	104.3	PGSC0003DMP400037933	98.7	4.63e-224
Soltu.Atl_v3.05_4G009020.9	Soltu.Atl_v3.05_4G009020			SBP	PF03110	SBP domain	2.6e-30	104.3	PGSC0003DMP400037933	98.7	4.63e-224
Soltu.Atl_v3.S013780.2	Soltu.Atl_v3.S013780			SBP	PF03110	SBP domain	2.6e-30	104.3	PGSC0003DMP400056411	51.1	2.67e-117
Soltu.Atl_v3.S072210.2	Soltu.Atl_v3.S072210			SBP	PF03110	SBP domain	2.6e-30	104.3	PGSC0003DMP400056411	51.3	4.88e-118
Soltu.Atl_v3.S077240.2	Soltu.Atl_v3.S077240			SBP	PF03110	SBP domain	2.6e-30	104.3	PGSC0003DMP400056411	51.1	2.67e-117
Soltu.Atl_v3.S092570.2	Soltu.Atl_v3.S092570			SBP	PF03110	SBP domain	2.6e-30	104.3	PGSC0003DMP400056411	51.1	2.67e-117
Soltu.Atl_v3.07_3G015060.1	Soltu.Atl_v3.07_3G015060			MYB	PF00249	Myb-like DNA-binding domain	2.4e-30	104.3	PGSC0003DMP400045417	98.4	5.72e-178
Soltu.Atl_v3.07_3G015100.1	Soltu.Atl_v3.07_3G015100			MYB	PF00249	Myb-like DNA-binding domain	2.3e-30	104.3	Sme2.5_09199.1_g00003.1	77.5	2.35e-125
MSTRG.14874.1	Soltu.Atl_v3.02_3G009330			TCP	PF03634	TCP family transcription factor	7.6e-30	104.4	PGSC0003DMP400046169	100	1.17e-106
Soltu.Atl_v3.02_4G008970.1	Soltu.Atl_v3.02_4G008970			TCP	PF03634	TCP family transcription factor	7.6e-30	104.4	PGSC0003DMP400046170	92.5	3.79e-133
MSTRG.37700.4	Soltu.Atl_v3.05_3G011040			SBP	PF03110	SBP domain	2.5e-30	104.4	PGSC0003DMP400037933	98.1	3.96e-223
Soltu.Atl_v3.05_3G011040.1	Soltu.Atl_v3.05_3G011040			SBP	PF03110	SBP domain	2.5e-30	104.4	PGSC0003DMP400037933	98.1	3.96e-223
Soltu.Atl_v3.05_3G011040.2	Soltu.Atl_v3.05_3G011040			SBP	PF03110	SBP domain	2.5e-30	104.4	PGSC0003DMP400037933	98.1	3.96e-223
Soltu.Atl_v3.05_3G011040.3	Soltu.Atl_v3.05_3G011040			SBP	PF03110	SBP domain	2.5e-30	104.4	PGSC0003DMP400037933	98.1	3.96e-223
Soltu.Atl_v3.05_3G011040.4	Soltu.Atl_v3.05_3G011040			SBP	PF03110	SBP domain	2.5e-30	104.4	PGSC0003DMP400037933	98.1	3.96e-223
Soltu.Atl_v3.05_3G011040.5	Soltu.Atl_v3.05_3G011040			SBP	PF03110	SBP domain	2.5e-30	104.4	PGSC0003DMP400037933	98.1	3.96e-223
Soltu.Atl_v3.04_0G002990.1	Soltu.Atl_v3.04_0G002990			SBP	PF03110	SBP domain	2.4e-30	104.4	Solyc04g045560.2.1	69.6	3.23e-143
Soltu.Atl_v3.S013780.1	Soltu.Atl_v3.S013780			SBP	PF03110	SBP domain	2.4e-30	104.4	Solyc04g045560.2.1	69.6	3.23e-143
Soltu.Atl_v3.S072210.1	Soltu.Atl_v3.S072210			SBP	PF03110	SBP domain	2.4e-30	104.4	PGSC0003DMP400056411	48.7	2.88e-105
Soltu.Atl_v3.S077240.1	Soltu.Atl_v3.S077240			SBP	PF03110	SBP domain	2.4e-30	104.4	Solyc04g045560.2.1	69.6	3.23e-143
Soltu.Atl_v3.S092570.1	Soltu.Atl_v3.S092570			SBP	PF03110	SBP domain	2.4e-30	104.4	Solyc04g045560.2.1	69.6	3.23e-143
Soltu.Atl_v3.05_1G001950.1	Soltu.Atl_v3.05_1G001950			RAV	PF02362	B3 DNA binding domain	2.2e-30	104.4	PGSC0003DMP400001547	98.8	1.43e-235
Soltu.Atl_v3.05_1G001950.1	Soltu.Atl_v3.05_1G001950			B3	PF02362	B3 DNA binding domain	2.2e-30	104.4	PGSC0003DMP400001547	98.8	1.43e-235
Soltu.Atl_v3.05_4G002440.1	Soltu.Atl_v3.05_4G002440			RAV	PF02362	B3 DNA binding domain	2.2e-30	104.4	PGSC0003DMP400001547	99.1	2.47e-236
Soltu.Atl_v3.05_4G002440.1	Soltu.Atl_v3.05_4G002440			B3	PF02362	B3 DNA binding domain	2.2e-30	104.4	PGSC0003DMP400001547	99.1	2.47e-236
Soltu.Atl_v3.05_3G002450.1	Soltu.Atl_v3.05_3G002450			RAV	PF02362	B3 DNA binding domain	2.1e-30	104.4	PGSC0003DMP400001547	98.8	1.17e-233
Soltu.Atl_v3.05_3G002450.1	Soltu.Atl_v3.05_3G002450			B3	PF02362	B3 DNA binding domain	2.1e-30	104.4	PGSC0003DMP400001547	98.8	1.17e-233
Soltu.Atl_v3.03_4G003780.1	Soltu.Atl_v3.03_4G003780			TCP	PF03634	TCP family transcription factor	7e-30	104.5	PGSC0003DMP400006021	99.3	1.27e-97
Soltu.Atl_v3.01_0G007450.1	Soltu.Atl_v3.01_0G007450			GRAS	PF03514	GRAS domain family	5.1e-30	104.5	PGSC0003DMP400037847	99.3	1.99e-96
Soltu.Atl_v3.09_1G010980.3	Soltu.Atl_v3.09_1G010980			ZF-HD	PF04770	ZF-HD protein dimerisation region	2.4e-30	104.5	PGSC0003DMP400030027	96.5	0
Soltu.Atl_v3.09_1G010980.5	Soltu.Atl_v3.09_1G010980			ZF-HD	PF04770	ZF-HD protein dimerisation region	2.4e-30	104.5	PGSC0003DMP400030027	96.7	0
MSTRG.8549.3	Soltu.Atl_v3.01_4G019070			SBP	PF03110	SBP domain	2.2e-30	104.5	PGSC0003DMP400009226	97.4	0
Soltu.Atl_v3.01_2G020130.1	Soltu.Atl_v3.01_2G020130			SBP	PF03110	SBP domain	2.2e-30	104.5	PGSC0003DMP400009226	97.4	0
Soltu.Atl_v3.01_2G020130.4	Soltu.Atl_v3.01_2G020130			SBP	PF03110	SBP domain	2.2e-30	104.5	PGSC0003DMP400009226	97.4	0
Soltu.Atl_v3.08_0G004450.10	Soltu.Atl_v3.08_0G004450			B3	PF02362	B3 DNA binding domain	2e-30	104.5	PGSC0003DMP400016864	77.9	4.84e-137
Soltu.Atl_v3.08_0G004450.7	Soltu.Atl_v3.08_0G004450			B3	PF02362	B3 DNA binding domain	2e-30	104.5	PGSC0003DMP400016864	77.9	4.84e-137
Soltu.Atl_v3.12_4G012640.1	Soltu.Atl_v3.12_4G012640			MYB	PF00249	Myb-like DNA-binding domain	2e-30	104.5	PGSC0003DMP400000691	100	1.53e-205
Soltu.Atl_v3.02_3G009330.1	Soltu.Atl_v3.02_3G009330			TCP	PF03634	TCP family transcription factor	6.4e-30	104.6	PGSC0003DMP400046170	99.5	3.43e-145
Soltu.Atl_v3.04_4G010250.1	Soltu.Atl_v3.04_4G010250			EIL	PF04873	Ethylene insensitive 3	4.6e-30	104.6	PGSC0003DMP400035837	57.3	3.64e-85
Soltu.Atl_v3.04_4G015650.1	Soltu.Atl_v3.04_4G015650			ZF-HD	PF04770	ZF-HD protein dimerisation region	2.3e-30	104.6	PGSC0003DMP400022870	95.9	6.83e-160
Soltu.Atl_v3.04_4G015900.1	Soltu.Atl_v3.04_4G015900			ZF-HD	PF04770	ZF-HD protein dimerisation region	2.3e-30	104.6	PGSC0003DMP400022870	100	7.77e-170
Soltu.Atl_v3.04_1G015480.1	Soltu.Atl_v3.04_1G015480			ZF-HD	PF04770	ZF-HD protein dimerisation region	2.2e-30	104.6	PGSC0003DMP400022870	97.9	2.39e-164
Soltu.Atl_v3.01_2G021760.1	Soltu.Atl_v3.01_2G021760			MYB	PF00249	Myb-like DNA-binding domain	1.9e-30	104.6	PGSC0003DMP400012169	93	1.63e-234
Soltu.Atl_v3.07_2G012030.4	Soltu.Atl_v3.07_2G012030			B3	PF02362	B3 DNA binding domain	1.9e-30	104.6	PGSC0003DMP400032011	89.3	4.07e-208
Soltu.Atl_v3.02_2G009450.1	Soltu.Atl_v3.02_2G009450			TCP	PF03634	TCP family transcription factor	5.9e-30	104.7	PGSC0003DMP400046170	94.2	5.18e-136
Soltu.Atl_v3.02_3G020800.2	Soltu.Atl_v3.02_3G020800			NAC	PF02365	No apical meristem (NAM) protein	3.1e-30	104.7	PGSC0003DMP400037231	62.6	9e-182
Soltu.Atl_v3.02_4G016740.1	Soltu.Atl_v3.02_4G016740			NAC	PF02365	No apical meristem (NAM) protein	3.1e-30	104.7	PGSC0003DMP400037231	64.4	5.72e-186
Soltu.Atl_v3.01_2G021800.1	Soltu.Atl_v3.01_2G021800			MYB	PF00249	Myb-like DNA-binding domain	1.8e-30	104.7	PGSC0003DMP400012169	100	1.29e-253
Soltu.Atl_v3.01_4G020850.1	Soltu.Atl_v3.01_4G020850			MYB	PF00249	Myb-like DNA-binding domain	1.8e-30	104.7	PGSC0003DMP400012169	100	1.29e-253
Soltu.Atl_v3.06_4G019410.2	Soltu.Atl_v3.06_4G019410			E2F/DP	PF02319	E2F/DP family winged-helix DNA-binding domain	1.7e-30	104.7	PGSC0003DMP400010520	96.5	1.24e-283
Soltu.Atl_v3.12_1G013500.1	Soltu.Atl_v3.12_1G013500			TCP	PF03634	TCP family transcription factor	5.6e-30	104.8	PGSC0003DMP400026962	93.4	5.83e-283
Soltu.Atl_v3.02_2G020540.3	Soltu.Atl_v3.02_2G020540			NAC	PF02365	No apical meristem (NAM) protein	3e-30	104.8	PGSC0003DMP400037231	63.8	1.77e-195
Soltu.Atl_v3.02_2G020540.2	Soltu.Atl_v3.02_2G020540			NAC	PF02365	No apical meristem (NAM) protein	2.9e-30	104.8	PGSC0003DMP400037231	63.8	6.9e-196
Soltu.Atl_v3.S072210.5	Soltu.Atl_v3.S072210			SBP	PF03110	SBP domain	1.8e-30	104.8	PGSC0003DMP400056410	53.8	7.95e-99
Soltu.Atl_v3.06_4G019410.1	Soltu.Atl_v3.06_4G019410			E2F/DP	PF02319	E2F/DP family winged-helix DNA-binding domain	1.6e-30	104.8	PGSC0003DMP400010520	92.2	5.37e-266
Soltu.Atl_v3.09_1G010980.2	Soltu.Atl_v3.09_1G010980			ZF-HD	PF04770	ZF-HD protein dimerisation region	1.8e-30	104.9	PGSC0003DMP400030026	96.7	1.85e-299
Soltu.Atl_v3.09_1G010980.4	Soltu.Atl_v3.09_1G010980			ZF-HD	PF04770	ZF-HD protein dimerisation region	1.8e-30	104.9	PGSC0003DMP400030026	96.7	1.85e-299
Soltu.Atl_v3.09_1G010980.6	Soltu.Atl_v3.09_1G010980			ZF-HD	PF04770	ZF-HD protein dimerisation region	1.8e-30	104.9	PGSC0003DMP400030026	96.7	1.85e-299
Soltu.Atl_v3.09_4G019560.4	Soltu.Atl_v3.09_4G019560			ZF-HD	PF04770	ZF-HD protein dimerisation region	1.8e-30	104.9	PGSC0003DMP400030026	96.7	1.07e-298
Soltu.Atl_v3.09_4G019560.5	Soltu.Atl_v3.09_4G019560			ZF-HD	PF04770	ZF-HD protein dimerisation region	1.8e-30	104.9	PGSC0003DMP400030026	96.7	1.07e-298
Soltu.Atl_v3.03_3G016120.1	Soltu.Atl_v3.03_3G016120			MYB	PF00249	Myb-like DNA-binding domain	1.6e-30	104.9	PGSC0003DMP400014630	88	1.24e-109
Soltu.Atl_v3.12_1G006850.1	Soltu.Atl_v3.12_1G006850			MYB	PF00249	Myb-like DNA-binding domain	1.6e-30	104.9	PGSC0003DMP400024309	99.6	9.53e-171
Soltu.Atl_v3.12_2G021720.1	Soltu.Atl_v3.12_2G021720			MYB	PF00249	Myb-like DNA-binding domain	1.6e-30	104.9	PGSC0003DMP400024309	99.1	7.83e-170
Soltu.Atl_v3.12_3G020370.1	Soltu.Atl_v3.12_3G020370			MYB	PF00249	Myb-like DNA-binding domain	1.6e-30	104.9	PGSC0003DMP400024309	99.1	7.83e-170
Soltu.Atl_v3.12_4G009870.1	Soltu.Atl_v3.12_4G009870			MYB	PF00249	Myb-like DNA-binding domain	1.6e-30	104.9	PGSC0003DMP400024309	99.1	7.83e-170
Soltu.Atl_v3.08_0G003440.1	Soltu.Atl_v3.08_0G003440			B3	PF02362	B3 DNA binding domain	1.5e-30	104.9	Sopen08g002260.1	46.7	1.48e-134
Soltu.Atl_v3.02_2G004790.5	Soltu.Atl_v3.02_2G004790			ARF	PF06507	Auxin response factor	1.6e-30	105	Sopen02g011920.1	91.1	0
Soltu.Atl_v3.S072210.4	Soltu.Atl_v3.S072210			SBP	PF03110	SBP domain	1.6e-30	105	PGSC0003DMP400056410	50.5	4.65e-86
Soltu.Atl_v3.06_4G019320.8	Soltu.Atl_v3.06_4G019320			YABBY	PF04690	YABBY protein	4.8e-30	105.1	PGSC0003DMP400010525	99.1	1.36e-74
Soltu.Atl_v3.06_4G020460.2	Soltu.Atl_v3.06_4G020460			ARF	PF06507	Auxin response factor	1.5e-30	105.1	Sopen06g031560.1	86.4	0
Soltu.Atl_v3.06_2G023300.2	Soltu.Atl_v3.06_2G023300			MYB	PF00249	Myb-like DNA-binding domain	1.3e-30	105.1	PGSC0003DMP400047028	98.1	1.64e-230
Soltu.Atl_v3.06_3G017250.2	Soltu.Atl_v3.06_3G017250			MYB	PF00249	Myb-like DNA-binding domain	1.3e-30	105.1	PGSC0003DMP400047028	98.1	1.64e-230
Soltu.Atl_v3.08_0G005430.2	Soltu.Atl_v3.08_0G005430			MYB	PF00249	Myb-like DNA-binding domain	1.3e-30	105.1	PGSC0003DMP400057504	92.4	6.87e-111
Soltu.Atl_v3.02_4G016740.3	Soltu.Atl_v3.02_4G016740			NAC	PF02365	No apical meristem (NAM) protein	2.2e-30	105.2	PGSC0003DMP400037231	64.4	3.55e-189
Soltu.Atl_v3.06_4G020460.1	Soltu.Atl_v3.06_4G020460			ARF	PF06507	Auxin response factor	1.4e-30	105.2	Sopen06g031560.1	90.8	0
Soltu.Atl_v3.11_0G002240.1	Soltu.Atl_v3.11_0G002240			MYB	PF00249	Myb-like DNA-binding domain	1.3e-30	105.2	PGSC0003DMP400027453	99.7	2.01e-214
Soltu.Atl_v3.11_3G001510.1	Soltu.Atl_v3.11_3G001510			MYB	PF00249	Myb-like DNA-binding domain	1.3e-30	105.2	PGSC0003DMP400027453	99.4	1.79e-213
Soltu.Atl_v3.11_4G002050.1	Soltu.Atl_v3.11_4G002050			MYB	PF00249	Myb-like DNA-binding domain	1.3e-30	105.2	PGSC0003DMP400027453	93.9	2.3e-204
Soltu.Atl_v3.06_1G011940.1	Soltu.Atl_v3.06_1G011940			MYB	PF00249	Myb-like DNA-binding domain	1.2e-30	105.2	PGSC0003DMP400047028	98.4	5.69e-230
Soltu.Atl_v3.06_4G016420.1	Soltu.Atl_v3.06_4G016420			MYB	PF00249	Myb-like DNA-binding domain	1.2e-30	105.2	PGSC0003DMP400047028	98.4	5.69e-230
Soltu.Atl_v3.01_0G020850.1	Soltu.Atl_v3.01_0G020850			FAR1	PF03101	FAR1 DNA-binding domain	1.9e-30	105.3	Solyc01g112320.2.1	59.2	7.88e-257
Soltu.Atl_v3.09_0G015180.1	Soltu.Atl_v3.09_0G015180			HSF	PF00447	HSF-type DNA-binding	1.7e-30	105.3	PGSC0003DMP400011443	99.7	4.06e-265
Soltu.Atl_v3.09_2G016580.1	Soltu.Atl_v3.09_2G016580			HSF	PF00447	HSF-type DNA-binding	1.7e-30	105.3	PGSC0003DMP400011443	100	2.45e-266
Soltu.Atl_v3.09_3G020060.1	Soltu.Atl_v3.09_3G020060			HSF	PF00447	HSF-type DNA-binding	1.7e-30	105.3	PGSC0003DMP400011443	96.1	4e-256
Soltu.Atl_v3.09_4G018080.1	Soltu.Atl_v3.09_4G018080			HSF	PF00447	HSF-type DNA-binding	1.7e-30	105.3	PGSC0003DMP400011443	96.1	4e-256
MSTRG.11218.1	Soltu.Atl_v3.02_1G018170			NAC	PF02365	No apical meristem (NAM) protein	1.8e-30	105.4	PGSC0003DMP400037231	60.3	6.49e-210
MSTRG.2369.3	Soltu.Atl_v3.01_1G021950			MIKC	PF01486	K-box region	1.2e-30	105.4	PGSC0003DMP400000297	100	4.63e-115
Soltu.Atl_v3.08_2G020050.1	Soltu.Atl_v3.08_2G020050			ARF	PF06507	Auxin response factor	1.2e-30	105.4	PGSC0003DMP400021708	98	0
Soltu.Atl_v3.08_2G020050.4	Soltu.Atl_v3.08_2G020050			ARF	PF06507	Auxin response factor	1.2e-30	105.4	PGSC0003DMP400021708	97.8	0
Soltu.Atl_v3.02_4G016740.2	Soltu.Atl_v3.02_4G016740			NAC	PF02365	No apical meristem (NAM) protein	1.8e-30	105.5	PGSC0003DMP400037231	60.8	6.98e-212
Soltu.Atl_v3.S072210.6	Soltu.Atl_v3.S072210			SBP	PF03110	SBP domain	1.1e-30	105.5	PGSC0003DMP400056410	61.3	8.7e-67
Soltu.Atl_v3.06_3G000290.1	Soltu.Atl_v3.06_3G000290			MYB	PF00249	Myb-like DNA-binding domain	1e-30	105.5	Solyc06g009480.1.1	85.9	4.11e-151
Soltu.Atl_v3.10_4G000990.1	Soltu.Atl_v3.10_4G000990			MYB	PF00249	Myb-like DNA-binding domain	1e-30	105.5	PGSC0003DMP400013034	99.7	5.83e-248
Soltu.Atl_v3.11_1G013810.1	Soltu.Atl_v3.11_1G013810			MYB	PF00249	Myb-like DNA-binding domain	1e-30	105.5	PGSC0003DMP400013034	99.4	5.83e-248
Soltu.Atl_v3.11_2G009930.1	Soltu.Atl_v3.11_2G009930			MYB	PF00249	Myb-like DNA-binding domain	1e-30	105.5	PGSC0003DMP400013034	99.4	5.83e-248
Soltu.Atl_v3.04_4G009020.1	Soltu.Atl_v3.04_4G009020			MYB	PF00249	Myb-like DNA-binding domain	9.9e-31	105.5	PGSC0003DMP400066962	97.7	1.74e-88
Soltu.Atl_v3.10_2G008630.1	Soltu.Atl_v3.10_2G008630			MYB	PF00249	Myb-like DNA-binding domain	9.8e-31	105.5	Sme2.5_05099.1_g00002.1	61.2	9.87e-96
Soltu.Atl_v3.02_3G020800.1	Soltu.Atl_v3.02_3G020800			NAC	PF02365	No apical meristem (NAM) protein	1.6e-30	105.6	PGSC0003DMP400037231	59.4	2.72e-210
Soltu.Atl_v3.01_3G037270.1	Soltu.Atl_v3.01_3G037270			FAR1	PF03101	FAR1 DNA-binding domain	1.5e-30	105.6	Sme2.5_01453.1_g00001.1	52.9	1.25e-158
Soltu.Atl_v3.08_2G020050.6	Soltu.Atl_v3.08_2G020050			ARF	PF06507	Auxin response factor	1.1e-30	105.6	PGSC0003DMP400021708	97.8	0
Soltu.Atl_v3.08_2G020050.3	Soltu.Atl_v3.08_2G020050			ARF	PF06507	Auxin response factor	1e-30	105.6	PGSC0003DMP400021708	97.9	0
Soltu.Atl_v3.08_2G020050.5	Soltu.Atl_v3.08_2G020050			ARF	PF06507	Auxin response factor	1e-30	105.6	PGSC0003DMP400021708	97.9	0
MSTRG.24365.3	Soltu.Atl_v3.03_3G024590			NAC	PF02365	No apical meristem (NAM) protein	1.5e-30	105.7	PGSC0003DMP400054092	98.8	8.77e-179
Soltu.Atl_v3.03_3G024590.3	Soltu.Atl_v3.03_3G024590			NAC	PF02365	No apical meristem (NAM) protein	1.5e-30	105.7	PGSC0003DMP400054092	99.2	8.77e-181
Soltu.Atl_v3.03_4G015260.3	Soltu.Atl_v3.03_4G015260			NAC	PF02365	No apical meristem (NAM) protein	1.5e-30	105.7	PGSC0003DMP400054092	98.8	8.77e-179
MSTRG.61232.2	Soltu.Atl_v3.09_2G017590			ZF-HD	PF04770	ZF-HD protein dimerisation region	1e-30	105.7	PGSC0003DMP400030026	99.6	2.18e-201
Soltu.Atl_v3.03_1G022140.2	Soltu.Atl_v3.03_1G022140			MYB	PF00249	Myb-like DNA-binding domain	8.9e-31	105.7	PGSC0003DMP400031557	96.6	7.48e-231
Soltu.Atl_v3.03_4G018450.2	Soltu.Atl_v3.03_4G018450			MYB	PF00249	Myb-like DNA-binding domain	8.7e-31	105.7	PGSC0003DMP400031557	97.9	5e-135
Soltu.Atl_v3.02_1G003600.1	Soltu.Atl_v3.02_1G003600			NAC	PF02365	No apical meristem (NAM) protein	1.4e-30	105.8	PGSC0003DMP400037231	95.4	0
Soltu.Atl_v3.02_2G004620.1	Soltu.Atl_v3.02_2G004620			NAC	PF02365	No apical meristem (NAM) protein	1.4e-30	105.8	PGSC0003DMP400037231	98.4	0
Soltu.Atl_v3.02_3G004740.1	Soltu.Atl_v3.02_3G004740			NAC	PF02365	No apical meristem (NAM) protein	1.4e-30	105.8	PGSC0003DMP400037231	99.8	0
Soltu.Atl_v3.02_4G004860.1	Soltu.Atl_v3.02_4G004860			NAC	PF02365	No apical meristem (NAM) protein	1.4e-30	105.8	PGSC0003DMP400037231	100	0
Soltu.Atl_v3.12_3G001850.1	Soltu.Atl_v3.12_3G001850			MYB	PF00249	Myb-like DNA-binding domain	8e-31	105.8	PGSC0003DMP400008158	80.2	5.47e-137
Soltu.Atl_v3.02_2G020540.1	Soltu.Atl_v3.02_2G020540			NAC	PF02365	No apical meristem (NAM) protein	1.4e-30	105.9	PGSC0003DMP400037231	63.2	8.38e-170
Soltu.Atl_v3.09_0G000090.1	Soltu.Atl_v3.09_0G000090			LBD (AS2/LOB)	PF03195	Protein of unknown function DUF260	1e-30	105.9	PGSC0003DMP400065207	70.4	3.74e-70
Soltu.Atl_v3.09_2G000380.1	Soltu.Atl_v3.09_2G000380			LBD (AS2/LOB)	PF03195	Protein of unknown function DUF260	1e-30	105.9	PGSC0003DMP400065207	70.4	3.74e-70
MSTRG.34259.3	Soltu.Atl_v3.05_1G001950			B3	PF02362	B3 DNA binding domain	7.6e-31	105.9	PGSC0003DMP400001547	99.5	5.83e-132
MSTRG.34259.4	Soltu.Atl_v3.05_1G001950			B3	PF02362	B3 DNA binding domain	7.6e-31	105.9	PGSC0003DMP400001547	99.5	5.83e-132
MSTRG.50717.1	Soltu.Atl_v3.07_3G017880			HSF	PF00447	HSF-type DNA-binding	1.1e-30	106	PGSC0003DMP400030290	100	9.2e-300
Soltu.Atl_v3.06_4G017600.1	Soltu.Atl_v3.06_4G017600			HSF	PF00447	HSF-type DNA-binding	1.1e-30	106	PGSC0003DMP400046950	99.8	0
Soltu.Atl_v3.06_4G017600.2	Soltu.Atl_v3.06_4G017600			HSF	PF00447	HSF-type DNA-binding	1.1e-30	106	PGSC0003DMP400046950	99.8	0
Soltu.Atl_v3.07_3G017880.1	Soltu.Atl_v3.07_3G017880			HSF	PF00447	HSF-type DNA-binding	1.1e-30	106	PGSC0003DMP400030290	100	9.2e-300
Soltu.Atl_v3.12_1G000620.1	Soltu.Atl_v3.12_1G000620			MYB	PF00249	Myb-like DNA-binding domain	7e-31	106	PGSC0003DMP400008158	86.1	3.94e-144
Soltu.Atl_v3.12_4G000800.1	Soltu.Atl_v3.12_4G000800			MYB	PF00249	Myb-like DNA-binding domain	7e-31	106	PGSC0003DMP400008158	86.1	3.94e-144
Soltu.Atl_v3.07_2G013810.1	Soltu.Atl_v3.07_2G013810			HSF	PF00447	HSF-type DNA-binding	1e-30	106.1	PGSC0003DMP400030290	97.3	6.37e-291
Soltu.Atl_v3.07_3G009630.1	Soltu.Atl_v3.07_3G009630			HSF	PF00447	HSF-type DNA-binding	1e-30	106.1	PGSC0003DMP400055694	95.1	2.6e-251
Soltu.Atl_v3.07_4G019140.1	Soltu.Atl_v3.07_4G019140			HSF	PF00447	HSF-type DNA-binding	1e-30	106.1	PGSC0003DMP400030290	97.3	6.37e-291
Soltu.Atl_v3.07_4G009090.1	Soltu.Atl_v3.07_4G009090			HSF	PF00447	HSF-type DNA-binding	9.7e-31	106.1	PGSC0003DMP400055694	98.1	2.33e-259
Soltu.Atl_v3.06_4G024380.1	Soltu.Atl_v3.06_4G024380			MYB	PF00249	Myb-like DNA-binding domain	6.7e-31	106.1	PGSC0003DMP400034798	100	1.45e-183
Soltu.Atl_v3.06_3G023260.1	Soltu.Atl_v3.06_3G023260			MYB	PF00249	Myb-like DNA-binding domain	6.6e-31	106.1	PGSC0003DMP400034798	99.2	8.41e-183
Soltu.Atl_v3.12_1G000610.1	Soltu.Atl_v3.12_1G000610			MYB	PF00249	Myb-like DNA-binding domain	6.5e-31	106.1	PGSC0003DMP400008158	98.3	6.84e-149
Soltu.Atl_v3.12_4G000790.1	Soltu.Atl_v3.12_4G000790			MYB	PF00249	Myb-like DNA-binding domain	6.5e-31	106.1	PGSC0003DMP400008158	98.3	6.84e-149
Soltu.Atl_v3.12_1G000600.1	Soltu.Atl_v3.12_1G000600			MYB	PF00249	Myb-like DNA-binding domain	6.4e-31	106.1	PGSC0003DMP400008160	100	3.71e-151
Soltu.Atl_v3.12_4G000780.1	Soltu.Atl_v3.12_4G000780			MYB	PF00249	Myb-like DNA-binding domain	6.4e-31	106.1	PGSC0003DMP400008160	100	3.71e-151
MSTRG.50198.1	Soltu.Atl_v3.07_3G009630			HSF	PF00447	HSF-type DNA-binding	9.5e-31	106.2	PGSC0003DMP400055694	98.3	1.23e-255
Soltu.Atl_v3.09_0G008550.1	Soltu.Atl_v3.09_0G008550			MYB	PF00249	Myb-like DNA-binding domain	6.1e-31	106.2	Sme2.5_02939.1_g00003.1	67.6	1.37e-130
Soltu.Atl_v3.09_3G009160.1	Soltu.Atl_v3.09_3G009160			MYB	PF00249	Myb-like DNA-binding domain	6.1e-31	106.2	Sme2.5_02939.1_g00003.1	67.3	7.87e-130
Soltu.Atl_v3.06_2G011330.1	Soltu.Atl_v3.06_2G011330			MYB	PF00249	Myb-like DNA-binding domain	6e-31	106.2	PGSC0003DMP400028466	98.1	3.56e-187
Soltu.Atl_v3.02_1G028700.1	Soltu.Atl_v3.02_1G028700			NAC	PF02365	No apical meristem (NAM) protein	9.7e-31	106.3	PGSC0003DMP400002396	99.1	2.87e-243
Soltu.Atl_v3.02_2G031880.1	Soltu.Atl_v3.02_2G031880			NAC	PF02365	No apical meristem (NAM) protein	9.7e-31	106.3	PGSC0003DMP400002396	99.1	2.87e-243
Soltu.Atl_v3.11_1G002920.1	Soltu.Atl_v3.11_1G002920			HSF	PF00447	HSF-type DNA-binding	8.4e-31	106.3	PGSC0003DMP400065338	94.3	1.13e-165
Soltu.Atl_v3.12_1G009900.1	Soltu.Atl_v3.12_1G009900			MYB	PF00249	Myb-like DNA-binding domain	5.8e-31	106.3	PGSC0003DMP400000691	96.9	4.5e-198
Soltu.Atl_v3.09_3G000280.3	Soltu.Atl_v3.09_3G000280			MYB	PF00249	Myb-like DNA-binding domain	5.6e-31	106.3	PGSC0003DMP400015671	91	0
Soltu.Atl_v3.12_3G023270.1	Soltu.Atl_v3.12_3G023270			MYB	PF00249	Myb-like DNA-binding domain	5.6e-31	106.3	PGSC0003DMP400000691	96.5	1.91e-199
Soltu.Atl_v3.02_1G027000.1	Soltu.Atl_v3.02_1G027000			B3	PF02362	B3 DNA binding domain	5.4e-31	106.3	PGSC0003DMP400017857	96.1	2.82e-142
Soltu.Atl_v3.02_3G031070.1	Soltu.Atl_v3.02_3G031070			B3	PF02362	B3 DNA binding domain	5.4e-31	106.3	PGSC0003DMP400017857	96.1	2.82e-142
Soltu.Atl_v3.02_4G021360.1	Soltu.Atl_v3.02_4G021360			B3	PF02362	B3 DNA binding domain	5.4e-31	106.3	PGSC0003DMP400017857	96.1	2.82e-142
Soltu.Atl_v3.09_0G005310.1	Soltu.Atl_v3.09_0G005310			TCP	PF03634	TCP family transcription factor	1.8e-30	106.4	PGSC0003DMP400037397	99.5	7.87e-137
Soltu.Atl_v3.09_2G005130.1	Soltu.Atl_v3.09_2G005130			TCP	PF03634	TCP family transcription factor	1.8e-30	106.4	PGSC0003DMP400037397	94	4.69e-129
Soltu.Atl_v3.09_3G003710.1	Soltu.Atl_v3.09_3G003710			TCP	PF03634	TCP family transcription factor	1.8e-30	106.4	PGSC0003DMP400037397	100	7.87e-137
Soltu.Atl_v3.09_4G003440.1	Soltu.Atl_v3.09_4G003440			TCP	PF03634	TCP family transcription factor	1.8e-30	106.4	PGSC0003DMP400037397	99.5	7.87e-137
Soltu.Atl_v3.02_0G004120.1	Soltu.Atl_v3.02_0G004120			NAC	PF02365	No apical meristem (NAM) protein	9.4e-31	106.4	PGSC0003DMP400002396	97.8	2.62e-238
Soltu.Atl_v3.02_4G023410.1	Soltu.Atl_v3.02_4G023410			NAC	PF02365	No apical meristem (NAM) protein	9.2e-31	106.4	PGSC0003DMP400002396	96.6	2.91e-232
Soltu.Atl_v3.08_2G020050.2	Soltu.Atl_v3.08_2G020050			ARF	PF06507	Auxin response factor	6e-31	106.4	PGSC0003DMP400021708	97.4	3.9e-275
Soltu.Atl_v3.11_3G021790.1	Soltu.Atl_v3.11_3G021790			MYB	PF00249	Myb-like DNA-binding domain	5.3e-31	106.4	PGSC0003DMP400027224	99.5	8.58e-138
MSTRG.65000.1	Soltu.Atl_v3.10_0G010210			MYB	PF00249	Myb-like DNA-binding domain	5.2e-31	106.4	Sopen10g035680.1	67.2	1.02e-116
Soltu.Atl_v3.01_0G015220.1	Soltu.Atl_v3.01_0G015220			MYB	PF00249	Myb-like DNA-binding domain	5.2e-31	106.4	PGSC0003DMP400031848	98.1	3.12e-303
Soltu.Atl_v3.01_3G026620.1	Soltu.Atl_v3.01_3G026620			MYB	PF00249	Myb-like DNA-binding domain	5.2e-31	106.4	PGSC0003DMP400031848	97.7	4.24e-301
Soltu.Atl_v3.04_1G019280.8	Soltu.Atl_v3.04_1G019280			B3	PF02362	B3 DNA binding domain	5.2e-31	106.4	Sopim04g079590.0.1	95.1	6.51e-273
Soltu.Atl_v3.02_3G030250.1	Soltu.Atl_v3.02_3G030250			MYB	PF00249	Myb-like DNA-binding domain	5.1e-31	106.4	PGSC0003DMP400031848	98.1	2.66e-305
Soltu.Atl_v3.10_1G000340.1	Soltu.Atl_v3.10_1G000340			MYB	PF00249	Myb-like DNA-binding domain	5.1e-31	106.4	PGSC0003DMP400012972	52.9	1.5e-111
Soltu.Atl_v3.11_3G002570.1	Soltu.Atl_v3.11_3G002570			HSF	PF00447	HSF-type DNA-binding	7.6e-31	106.5	PGSC0003DMP400065338	100	6.92e-176
Soltu.Atl_v3.11_2G002190.1	Soltu.Atl_v3.11_2G002190			HSF	PF00447	HSF-type DNA-binding	7.4e-31	106.5	PGSC0003DMP400065338	98	7.75e-173
Soltu.Atl_v3.10_0G000360.1	Soltu.Atl_v3.10_0G000360			MYB	PF00249	Myb-like DNA-binding domain	5.1e-31	106.5	PGSC0003DMP400012972	53.5	3.71e-112
Soltu.Atl_v3.01_4G028320.1	Soltu.Atl_v3.01_4G028320			MYB	PF00249	Myb-like DNA-binding domain	5e-31	106.5	PGSC0003DMP400031848	98.6	1.04e-306
Soltu.Atl_v3.10_2G000290.1	Soltu.Atl_v3.10_2G000290			MYB	PF00249	Myb-like DNA-binding domain	5e-31	106.5	PGSC0003DMP400012972	53.2	1.06e-111
Soltu.Atl_v3.12_2G005000.1	Soltu.Atl_v3.12_2G005000			MYB	PF00249	Myb-like DNA-binding domain	4.9e-31	106.5	PGSC0003DMP400021429	49.1	3.83e-76
Soltu.Atl_v3.07_1G015180.1	Soltu.Atl_v3.07_1G015180			HSF	PF00447	HSF-type DNA-binding	6.9e-31	106.6	PGSC0003DMP400030290	97.1	1.28e-290
MSTRG.68448.1	Soltu.Atl_v3.10_4G005350			MYB	PF00249	Myb-like DNA-binding domain	4.5e-31	106.6	Solyc10g086290.1.1	67.3	7.88e-118
Soltu.Atl_v3.02_3G021950.2	Soltu.Atl_v3.02_3G021950			ARF	PF06507	Auxin response factor	4.7e-31	106.7	PGSC0003DMP400021708	99.8	0
Soltu.Atl_v3.08_1G018890.2	Soltu.Atl_v3.08_1G018890			ARF	PF06507	Auxin response factor	4.7e-31	106.7	PGSC0003DMP400021708	99.8	0
Soltu.Atl_v3.06_1G011050.1	Soltu.Atl_v3.06_1G011050			Dof	PF02701	Dof domain, zinc finger	4.4e-31	106.7	PGSC0003DMP400055798	100	0
Soltu.Atl_v3.06_2G022260.1	Soltu.Atl_v3.06_2G022260			Dof	PF02701	Dof domain, zinc finger	4.4e-31	106.7	PGSC0003DMP400055798	97.8	0
Soltu.Atl_v3.06_3G016200.1	Soltu.Atl_v3.06_3G016200			Dof	PF02701	Dof domain, zinc finger	4.4e-31	106.7	PGSC0003DMP400055798	97.8	0
Soltu.Atl_v3.06_4G015450.1	Soltu.Atl_v3.06_4G015450			Dof	PF02701	Dof domain, zinc finger	4.4e-31	106.7	PGSC0003DMP400055798	100	0
Soltu.Atl_v3.01_1G006190.1	Soltu.Atl_v3.01_1G006190			MYB	PF00249	Myb-like DNA-binding domain	4.3e-31	106.7	PGSC0003DMP400025180	63.2	3.46e-107
MSTRG.21997.1	Soltu.Atl_v3.03_2G012930			HSF	PF00447	HSF-type DNA-binding	5.9e-31	106.8	PGSC0003DMP400025228	76.9	1.11e-166
MSTRG.21997.2	Soltu.Atl_v3.03_2G012930			HSF	PF00447	HSF-type DNA-binding	5.9e-31	106.8	PGSC0003DMP400025228	76.9	1.11e-166
Soltu.Atl_v3.03_2G012920.1	Soltu.Atl_v3.03_2G012920			HSF	PF00447	HSF-type DNA-binding	5.9e-31	106.8	PGSC0003DMP400025228	76.9	1.11e-166
Soltu.Atl_v3.02_1G008650.1	Soltu.Atl_v3.02_1G008650			ZF-HD	PF04770	ZF-HD protein dimerisation region	4.7e-31	106.8	Solyc02g067330.1.1	90.1	9.99e-58
Soltu.Atl_v3.02_3G021950.1	Soltu.Atl_v3.02_3G021950			ARF	PF06507	Auxin response factor	4.5e-31	106.8	PGSC0003DMP400021708	100	0
Soltu.Atl_v3.02_3G021950.3	Soltu.Atl_v3.02_3G021950			ARF	PF06507	Auxin response factor	4.5e-31	106.8	PGSC0003DMP400021708	100	0
Soltu.Atl_v3.08_1G018890.1	Soltu.Atl_v3.08_1G018890			ARF	PF06507	Auxin response factor	4.5e-31	106.8	PGSC0003DMP400021708	100	0
Soltu.Atl_v3.08_1G018890.3	Soltu.Atl_v3.08_1G018890			ARF	PF06507	Auxin response factor	4.5e-31	106.8	PGSC0003DMP400021708	100	0
Soltu.Atl_v3.S154360.1	Soltu.Atl_v3.S154360			SBP	PF03110	SBP domain	4.3e-31	106.8	PGSC0003DMP400050777	100	6.05e-214
Soltu.Atl_v3.S154360.3	Soltu.Atl_v3.S154360			SBP	PF03110	SBP domain	4.3e-31	106.8	PGSC0003DMP400050776	100	6.53e-212
Soltu.Atl_v3.02_2G017850.1	Soltu.Atl_v3.02_2G017850			Dof	PF02701	Dof domain, zinc finger	4.1e-31	106.8	PGSC0003DMP400038896	94.7	1.29e-183
Soltu.Atl_v3.09_2G002550.1	Soltu.Atl_v3.09_2G002550			B3	PF02362	B3 DNA binding domain	3.9e-31	106.8	PGSC0003DMP400015722	95.3	2.36e-152
Soltu.Atl_v3.09_2G002550.2	Soltu.Atl_v3.09_2G002550			B3	PF02362	B3 DNA binding domain	3.8e-31	106.8	PGSC0003DMP400015722	90.9	4.56e-156
Soltu.Atl_v3.02_2G010060.1	Soltu.Atl_v3.02_2G010060			ZF-HD	PF04770	ZF-HD protein dimerisation region	4.3e-31	106.9	Solyc02g067330.1.1	94.5	2.98e-59
Soltu.Atl_v3.02_3G021950.5	Soltu.Atl_v3.02_3G021950			ARF	PF06507	Auxin response factor	4.2e-31	106.9	PGSC0003DMP400021708	96.3	0
Soltu.Atl_v3.08_1G018890.5	Soltu.Atl_v3.08_1G018890			ARF	PF06507	Auxin response factor	4.2e-31	106.9	PGSC0003DMP400021708	96.3	0
Soltu.Atl_v3.02_3G021950.4	Soltu.Atl_v3.02_3G021950			ARF	PF06507	Auxin response factor	4e-31	106.9	PGSC0003DMP400021708	100	0
Soltu.Atl_v3.08_1G018890.4	Soltu.Atl_v3.08_1G018890			ARF	PF06507	Auxin response factor	4e-31	106.9	PGSC0003DMP400021708	100	0
Soltu.Atl_v3.12_2G014280.1	Soltu.Atl_v3.12_2G014280			SBP	PF03110	SBP domain	4e-31	106.9	PGSC0003DMP400040233	97.4	0
Soltu.Atl_v3.12_2G014280.2	Soltu.Atl_v3.12_2G014280			SBP	PF03110	SBP domain	4e-31	106.9	PGSC0003DMP400040233	97.4	0
Soltu.Atl_v3.12_2G014280.3	Soltu.Atl_v3.12_2G014280			SBP	PF03110	SBP domain	4e-31	106.9	PGSC0003DMP400040233	97.4	0
Soltu.Atl_v3.S154360.2	Soltu.Atl_v3.S154360			SBP	PF03110	SBP domain	4e-31	106.9	PGSC0003DMP400050776	100	3.57e-191
Soltu.Atl_v3.S013970.1	Soltu.Atl_v3.S013970			SBP	PF03110	SBP domain	3.9e-31	106.9	PGSC0003DMP400040233	98	0
Soltu.Atl_v3.S013970.2	Soltu.Atl_v3.S013970			SBP	PF03110	SBP domain	3.9e-31	106.9	PGSC0003DMP400040233	98	0
Soltu.Atl_v3.S013970.3	Soltu.Atl_v3.S013970			SBP	PF03110	SBP domain	3.9e-31	106.9	PGSC0003DMP400040233	98	0
Soltu.Atl_v3.S013970.4	Soltu.Atl_v3.S013970			SBP	PF03110	SBP domain	3.9e-31	106.9	PGSC0003DMP400040233	98	0
Soltu.Atl_v3.S013970.5	Soltu.Atl_v3.S013970			SBP	PF03110	SBP domain	3.9e-31	106.9	PGSC0003DMP400040233	98	0
Soltu.Atl_v3.03_1G022930.1	Soltu.Atl_v3.03_1G022930			MYB	PF00249	Myb-like DNA-binding domain	3.8e-31	106.9	PGSC0003DMP400031526	97.2	1.24e-255
Soltu.Atl_v3.12_2G021730.1	Soltu.Atl_v3.12_2G021730			MYB	PF00249	Myb-like DNA-binding domain	3.8e-31	106.9	PGSC0003DMP400024309	98.3	1.58e-169
Soltu.Atl_v3.09_2G002550.3	Soltu.Atl_v3.09_2G002550			B3	PF02362	B3 DNA binding domain	3.6e-31	106.9	PGSC0003DMP400015722	95.3	1.24e-152
Soltu.Atl_v3.10_2G014200.1	Soltu.Atl_v3.10_2G014200			HSF	PF00447	HSF-type DNA-binding	5.3e-31	107	PGSC0003DMP400014364	93.9	3.46e-141
Soltu.Atl_v3.10_3G011180.1	Soltu.Atl_v3.10_3G011180			HSF	PF00447	HSF-type DNA-binding	5.3e-31	107	PGSC0003DMP400014364	100	4.44e-146
Soltu.Atl_v3.S109820.1	Soltu.Atl_v3.S109820			HSF	PF00447	HSF-type DNA-binding	5.3e-31	107	PGSC0003DMP400014364	100	4.44e-146
Soltu.Atl_v3.06_1G013100.1	Soltu.Atl_v3.06_1G013100			HSF	PF00447	HSF-type DNA-binding	5.1e-31	107	PGSC0003DMP400046950	99.4	0
Soltu.Atl_v3.06_1G013100.2	Soltu.Atl_v3.06_1G013100			HSF	PF00447	HSF-type DNA-binding	5.1e-31	107	PGSC0003DMP400046950	99.4	0
Soltu.Atl_v3.06_3G018340.1	Soltu.Atl_v3.06_3G018340			HSF	PF00447	HSF-type DNA-binding	5.1e-31	107	PGSC0003DMP400046950	97.5	0
Soltu.Atl_v3.06_3G018340.2	Soltu.Atl_v3.06_3G018340			HSF	PF00447	HSF-type DNA-binding	5.1e-31	107	PGSC0003DMP400046950	97.5	0
Soltu.Atl_v3.06_3G018340.3	Soltu.Atl_v3.06_3G018340			HSF	PF00447	HSF-type DNA-binding	5.1e-31	107	PGSC0003DMP400046950	97.5	0
Soltu.Atl_v3.06_3G018340.4	Soltu.Atl_v3.06_3G018340			HSF	PF00447	HSF-type DNA-binding	5.1e-31	107	PGSC0003DMP400046950	97.5	0
Soltu.Atl_v3.06_3G018340.7	Soltu.Atl_v3.06_3G018340			HSF	PF00447	HSF-type DNA-binding	5.1e-31	107	PGSC0003DMP400046950	97.5	0
Soltu.Atl_v3.03_1G031820.1	Soltu.Atl_v3.03_1G031820			MYB	PF00249	Myb-like DNA-binding domain	3.5e-31	107	PGSC0003DMP400059142	86.6	6.63e-169
Soltu.Atl_v3.S074780.1	Soltu.Atl_v3.S074780			MYB	PF00249	Myb-like DNA-binding domain	3.5e-31	107	PGSC0003DMP400059142	99.6	3.33e-171
Soltu.Atl_v3.S074850.1	Soltu.Atl_v3.S074850			MYB	PF00249	Myb-like DNA-binding domain	3.5e-31	107	PGSC0003DMP400059142	99.6	3.33e-171
Soltu.Atl_v3.S074920.1	Soltu.Atl_v3.S074920			MYB	PF00249	Myb-like DNA-binding domain	3.5e-31	107	PGSC0003DMP400059142	99.6	3.33e-171
Soltu.Atl_v3.06_2G024540.1	Soltu.Atl_v3.06_2G024540			HSF	PF00447	HSF-type DNA-binding	4.9e-31	107.1	PGSC0003DMP400046950	98.3	0
Soltu.Atl_v3.06_2G024540.3	Soltu.Atl_v3.06_2G024540			HSF	PF00447	HSF-type DNA-binding	4.9e-31	107.1	PGSC0003DMP400046950	98.3	0
Soltu.Atl_v3.06_2G024540.6	Soltu.Atl_v3.06_2G024540			HSF	PF00447	HSF-type DNA-binding	4.9e-31	107.1	PGSC0003DMP400046950	98.3	0
Soltu.Atl_v3.05_1G004400.1	Soltu.Atl_v3.05_1G004400			MYB	PF00249	Myb-like DNA-binding domain	3.3e-31	107.1	PGSC0003DMP400032125	96.2	4.28e-245
Soltu.Atl_v3.05_2G004930.1	Soltu.Atl_v3.05_2G004930			MYB	PF00249	Myb-like DNA-binding domain	3.2e-31	107.1	PGSC0003DMP400032125	97	1.9e-215
Soltu.Atl_v3.04_4G009070.1	Soltu.Atl_v3.04_4G009070			MYB	PF00249	Myb-like DNA-binding domain	3.1e-31	107.1	PGSC0003DMP400056681	97.7	3.1e-96
Soltu.Atl_v3.06_4G000290.1	Soltu.Atl_v3.06_4G000290			MYB	PF00249	Myb-like DNA-binding domain	3.1e-31	107.1	Solyc06g009480.1.1	85.5	1.43e-149
Soltu.Atl_v3.12_2G002720.1	Soltu.Atl_v3.12_2G002720			MYB	PF00249	Myb-like DNA-binding domain	3.1e-31	107.1	PGSC0003DMP400008158	92.3	1.61e-147
Soltu.Atl_v3.03_2G018770.1	Soltu.Atl_v3.03_2G018770			C3H	PF00642	Zinc finger C-x8-C-x5-C-x3-H type (and similar)	2e-31	107.1	PGSC0003DMP400026613	79.1	7.09e-135
Soltu.Atl_v3.02_3G033930.2	Soltu.Atl_v3.02_3G033930			TCP	PF03634	TCP family transcription factor	1e-30	107.2	PGSC0003DMP400035189	98.3	2.88e-152
Soltu.Atl_v3.09_3G000820.1	Soltu.Atl_v3.09_3G000820			B3	PF02362	B3 DNA binding domain	3e-31	107.2	PGSC0003DMP400015722	91.1	2.15e-152
Soltu.Atl_v3.12_1G007170.1	Soltu.Atl_v3.12_1G007170			MYB	PF00249	Myb-like DNA-binding domain	3e-31	107.2	PGSC0003DMP400024514	99.4	0
Soltu.Atl_v3.S036070.1	Soltu.Atl_v3.S036070			B3	PF02362	B3 DNA binding domain	3e-31	107.2	PGSC0003DMP400015722	91.1	2.15e-152
Soltu.Atl_v3.02_3G033930.3	Soltu.Atl_v3.02_3G033930			TCP	PF03634	TCP family transcription factor	9.7e-31	107.3	PGSC0003DMP400035189	98.3	2.88e-152
MSTRG.38828.8	Soltu.Atl_v3.05_4G009020			SBP	PF03110	SBP domain	3e-31	107.3	PGSC0003DMP400037933	100	1.22e-77
Soltu.Atl_v3.07_2G011770.1	Soltu.Atl_v3.07_2G011770			MYB	PF00249	Myb-like DNA-binding domain	2.8e-31	107.3	Sme2.5_09199.1_g00003.1	78.8	4.26e-127
Soltu.Atl_v3.07_4G016270.1	Soltu.Atl_v3.07_4G016270			MYB	PF00249	Myb-like DNA-binding domain	2.8e-31	107.3	Sme2.5_09199.1_g00003.1	78.9	2.97e-125
Soltu.Atl_v3.02_3G033930.1	Soltu.Atl_v3.02_3G033930			TCP	PF03634	TCP family transcription factor	9.2e-31	107.4	PGSC0003DMP400035189	98.3	2.88e-152
Soltu.Atl_v3.08_4G008120.4	Soltu.Atl_v3.08_4G008120			HSF	PF00447	HSF-type DNA-binding	3.8e-31	107.4	PGSC0003DMP400014459	96.1	6.68e-222
Soltu.Atl_v3.09_0G003700.1	Soltu.Atl_v3.09_0G003700			B3	PF02362	B3 DNA binding domain	2.6e-31	107.4	PGSC0003DMP400015722	90.5	2.1e-151
Soltu.Atl_v3.09_0G003700.2	Soltu.Atl_v3.09_0G003700			B3	PF02362	B3 DNA binding domain	2.6e-31	107.4	PGSC0003DMP400015722	95.8	1.03e-122
Soltu.Atl_v3.09_0G004110.1	Soltu.Atl_v3.09_0G004110			B3	PF02362	B3 DNA binding domain	2.6e-31	107.4	PGSC0003DMP400015722	90.5	2.1e-151
Soltu.Atl_v3.09_0G004110.2	Soltu.Atl_v3.09_0G004110			B3	PF02362	B3 DNA binding domain	2.6e-31	107.4	PGSC0003DMP400015722	95.8	1.03e-122
Soltu.Atl_v3.S039530.1	Soltu.Atl_v3.S039530			MYB	PF00249	Myb-like DNA-binding domain	2.6e-31	107.4	PGSC0003DMP400032125	97.6	9.4e-249
Soltu.Atl_v3.S039590.1	Soltu.Atl_v3.S039590			MYB	PF00249	Myb-like DNA-binding domain	2.6e-31	107.4	PGSC0003DMP400032125	97.6	9.4e-249
Soltu.Atl_v3.S077710.1	Soltu.Atl_v3.S077710			MYB	PF00249	Myb-like DNA-binding domain	2.6e-31	107.4	PGSC0003DMP400032125	97.6	9.4e-249
Soltu.Atl_v3.07_1G012160.1	Soltu.Atl_v3.07_1G012160			MYB	PF00249	Myb-like DNA-binding domain	2.5e-31	107.4	Sme2.5_09199.1_g00003.1	77	1.11e-123
Soltu.Atl_v3.08_1G004110.7	Soltu.Atl_v3.08_1G004110			HSF	PF00447	HSF-type DNA-binding	3.7e-31	107.5	PGSC0003DMP400014460	95.6	2.59e-224
Soltu.Atl_v3.08_3G005590.7	Soltu.Atl_v3.08_3G005590			HSF	PF00447	HSF-type DNA-binding	3.7e-31	107.5	PGSC0003DMP400014460	95.6	2.59e-224
MSTRG.55068.2	Soltu.Atl_v3.08_2G008750			HSF	PF00447	HSF-type DNA-binding	3.6e-31	107.5	PGSC0003DMP400014460	95.7	2.68e-226
Soltu.Atl_v3.08_2G008750.1	Soltu.Atl_v3.08_2G008750			HSF	PF00447	HSF-type DNA-binding	3.6e-31	107.5	PGSC0003DMP400014460	95.7	2.68e-226
Soltu.Atl_v3.08_4G008120.2	Soltu.Atl_v3.08_4G008120			HSF	PF00447	HSF-type DNA-binding	3.6e-31	107.5	PGSC0003DMP400014460	96.2	1.14e-227
Soltu.Atl_v3.09_3G002230.18	Soltu.Atl_v3.09_3G002230			HSF	PF00447	HSF-type DNA-binding	3.6e-31	107.5	PGSC0003DMP400004805	99.1	0
Soltu.Atl_v3.11_4G003810.1	Soltu.Atl_v3.11_4G003810			HSF	PF00447	HSF-type DNA-binding	3.6e-31	107.5	PGSC0003DMP400065338	95.9	1.23e-169
Soltu.Atl_v3.12_1G003160.1	Soltu.Atl_v3.12_1G003160			MYB	PF00249	Myb-like DNA-binding domain	2.4e-31	107.5	Sopen12g023780.1	86.4	2.53e-202
Soltu.Atl_v3.12_2G009910.1	Soltu.Atl_v3.12_2G009910			MYB	PF00249	Myb-like DNA-binding domain	2.4e-31	107.5	Sopen12g023780.1	86.1	6e-203
Soltu.Atl_v3.12_3G001840.1	Soltu.Atl_v3.12_3G001840			MYB	PF00249	Myb-like DNA-binding domain	2.3e-31	107.5	PGSC0003DMP400008160	80.9	2.54e-137
Soltu.Atl_v3.06_4G005500.1	Soltu.Atl_v3.06_4G005500			HD-ZIP	PF01852	START domain	5.2e-31	107.6	PGSC0003DMP400029101	56.6	4.08e-213
Soltu.Atl_v3.08_1G004110.1	Soltu.Atl_v3.08_1G004110			HSF	PF00447	HSF-type DNA-binding	3.5e-31	107.6	PGSC0003DMP400014460	95.6	1.08e-224
Soltu.Atl_v3.08_1G004110.5	Soltu.Atl_v3.08_1G004110			HSF	PF00447	HSF-type DNA-binding	3.5e-31	107.6	PGSC0003DMP400014460	95.6	1.08e-224
Soltu.Atl_v3.08_3G005590.1	Soltu.Atl_v3.08_3G005590			HSF	PF00447	HSF-type DNA-binding	3.5e-31	107.6	PGSC0003DMP400014460	95.6	1.08e-224
Soltu.Atl_v3.08_3G005590.5	Soltu.Atl_v3.08_3G005590			HSF	PF00447	HSF-type DNA-binding	3.5e-31	107.6	PGSC0003DMP400014460	95.6	1.08e-224
Soltu.Atl_v3.S027980.1	Soltu.Atl_v3.S027980			MYB	PF00249	Myb-like DNA-binding domain	2.3e-31	107.6	Sme2.5_02939.1_g00003.1	76.6	8.27e-115
MSTRG.76147.1	Soltu.Atl_v3.12_2G002690			MYB	PF00249	Myb-like DNA-binding domain	2.2e-31	107.6	PGSC0003DMP400008160	91.7	1.02e-144
Soltu.Atl_v3.03_1G018270.1	Soltu.Atl_v3.03_1G018270			HSF	PF00447	HSF-type DNA-binding	3.1e-31	107.7	PGSC0003DMP400005713	99.8	0
Soltu.Atl_v3.03_1G018270.2	Soltu.Atl_v3.03_1G018270			HSF	PF00447	HSF-type DNA-binding	3.1e-31	107.7	PGSC0003DMP400005713	99.8	0
Soltu.Atl_v3.03_2G015400.1	Soltu.Atl_v3.03_2G015400			HSF	PF00447	HSF-type DNA-binding	3.1e-31	107.7	PGSC0003DMP400005713	99.8	0
Soltu.Atl_v3.03_2G015400.2	Soltu.Atl_v3.03_2G015400			HSF	PF00447	HSF-type DNA-binding	3.1e-31	107.7	PGSC0003DMP400005713	99.8	0
Soltu.Atl_v3.06_1G016390.1	Soltu.Atl_v3.06_1G016390			MYB	PF00249	Myb-like DNA-binding domain	2.1e-31	107.7	PGSC0003DMP400066245	93.8	2.25e-189
Soltu.Atl_v3.08_1G002330.1	Soltu.Atl_v3.08_1G002330			MYB	PF00249	Myb-like DNA-binding domain	2.1e-31	107.7	PGSC0003DMP400010367	60.2	5.43e-124
Soltu.Atl_v3.11_1G019210.2	Soltu.Atl_v3.11_1G019210			MYB	PF00249	Myb-like DNA-binding domain	2.1e-31	107.7	PGSC0003DMP400027224	98.2	1e-136
Soltu.Atl_v3.11_2G015120.2	Soltu.Atl_v3.11_2G015120			MYB	PF00249	Myb-like DNA-binding domain	2.1e-31	107.7	PGSC0003DMP400027224	98.2	1e-136
Soltu.Atl_v3.11_4G020200.1	Soltu.Atl_v3.11_4G020200			MYB	PF00249	Myb-like DNA-binding domain	2.1e-31	107.7	PGSC0003DMP400027224	98.2	1e-136
Soltu.Atl_v3.06_4G022240.1	Soltu.Atl_v3.06_4G022240			MYB	PF00249	Myb-like DNA-binding domain	2e-31	107.7	PGSC0003DMP400066245	95.7	1.36e-194
Soltu.Atl_v3.08_2G020270.1	Soltu.Atl_v3.08_2G020270			MYB	PF00249	Myb-like DNA-binding domain	2e-31	107.7	PGSC0003DMP400021429	98.2	5.1e-196
Soltu.Atl_v3.03_3G023310.1	Soltu.Atl_v3.03_3G023310			HSF	PF00447	HSF-type DNA-binding	3e-31	107.8	PGSC0003DMP400005713	98.8	0
Soltu.Atl_v3.03_3G023310.2	Soltu.Atl_v3.03_3G023310			HSF	PF00447	HSF-type DNA-binding	3e-31	107.8	PGSC0003DMP400005713	98.8	0
Soltu.Atl_v3.03_3G023310.3	Soltu.Atl_v3.03_3G023310			HSF	PF00447	HSF-type DNA-binding	3e-31	107.8	PGSC0003DMP400005713	98.8	0
Soltu.Atl_v3.12_1G001290.1	Soltu.Atl_v3.12_1G001290			HSF	PF00447	HSF-type DNA-binding	2.9e-31	107.8	PGSC0003DMP400008251	91.8	2.84e-301
Soltu.Atl_v3.12_4G001460.1	Soltu.Atl_v3.12_4G001460			HSF	PF00447	HSF-type DNA-binding	2.9e-31	107.8	PGSC0003DMP400008251	91.8	2.84e-301
Soltu.Atl_v3.09_3G000820.2	Soltu.Atl_v3.09_3G000820			B3	PF02362	B3 DNA binding domain	1.9e-31	107.8	PGSC0003DMP400015722	96.3	4.22e-123
Soltu.Atl_v3.12_2G002690.1	Soltu.Atl_v3.12_2G002690			MYB	PF00249	Myb-like DNA-binding domain	1.9e-31	107.8	PGSC0003DMP400008160	91.7	9.33e-145
Soltu.Atl_v3.12_3G004100.1	Soltu.Atl_v3.12_3G004100			MYB	PF00249	Myb-like DNA-binding domain	1.9e-31	107.8	PGSC0003DMP400021429	47.5	1.42e-73
Soltu.Atl_v3.S036070.2	Soltu.Atl_v3.S036070			B3	PF02362	B3 DNA binding domain	1.9e-31	107.8	PGSC0003DMP400015722	96.3	4.22e-123
Soltu.Atl_v3.03_0G005020.1	Soltu.Atl_v3.03_0G005020			C3H	PF00642	Zinc finger C-x8-C-x5-C-x3-H type (and similar)	1.2e-31	107.8	PGSC0003DMP400026613	80.7	2.24e-140
Soltu.Atl_v3.03_4G017430.1	Soltu.Atl_v3.03_4G017430			C3H	PF00642	Zinc finger C-x8-C-x5-C-x3-H type (and similar)	1.2e-31	107.8	PGSC0003DMP400026613	80.7	2.24e-140
Soltu.Atl_v3.S107940.1	Soltu.Atl_v3.S107940			C3H	PF00642	Zinc finger C-x8-C-x5-C-x3-H type (and similar)	1.2e-31	107.8	PGSC0003DMP400026613	80.7	2.24e-140
Soltu.Atl_v3.09_0G004360.10	Soltu.Atl_v3.09_0G004360			HSF	PF00447	HSF-type DNA-binding	2.8e-31	107.9	PGSC0003DMP400004805	99.6	0
Soltu.Atl_v3.09_4G002560.14	Soltu.Atl_v3.09_4G002560			HSF	PF00447	HSF-type DNA-binding	2.8e-31	107.9	PGSC0003DMP400004805	99.6	0
Soltu.Atl_v3.02_3G009890.1	Soltu.Atl_v3.02_3G009890			ZF-HD	PF04770	ZF-HD protein dimerisation region	2.1e-31	107.9	Solyc02g067330.1.1	94.5	7.31e-60
Soltu.Atl_v3.02_4G009520.1	Soltu.Atl_v3.02_4G009520			ZF-HD	PF04770	ZF-HD protein dimerisation region	2.1e-31	107.9	Solyc02g067330.1.1	94.5	6.01e-59
Soltu.Atl_v3.02_0G001780.1	Soltu.Atl_v3.02_0G001780			Dof	PF02701	Dof domain, zinc finger	1.8e-31	107.9	PGSC0003DMP400038896	98.6	1.24e-194
Soltu.Atl_v3.02_0G001820.1	Soltu.Atl_v3.02_0G001820			Dof	PF02701	Dof domain, zinc finger	1.8e-31	107.9	PGSC0003DMP400038896	98.6	1.24e-194
Soltu.Atl_v3.02_1G013620.1	Soltu.Atl_v3.02_1G013620			TCP	PF03634	TCP family transcription factor	6e-31	108	PGSC0003DMP400039819	96.7	4.77e-224
Soltu.Atl_v3.02_4G014330.1	Soltu.Atl_v3.02_4G014330			TCP	PF03634	TCP family transcription factor	6e-31	108	PGSC0003DMP400039819	97.9	9.06e-230
Soltu.Atl_v3.02_2G016420.1	Soltu.Atl_v3.02_2G016420			TCP	PF03634	TCP family transcription factor	5.9e-31	108	PGSC0003DMP400039819	94.5	3.68e-160
Soltu.Atl_v3.12_1G001290.2	Soltu.Atl_v3.12_1G001290			HSF	PF00447	HSF-type DNA-binding	2.6e-31	108	PGSC0003DMP400008251	99.4	0
Soltu.Atl_v3.12_4G001460.2	Soltu.Atl_v3.12_4G001460			HSF	PF00447	HSF-type DNA-binding	2.6e-31	108	PGSC0003DMP400008251	99.4	0
Soltu.Atl_v3.01_1G021050.1	Soltu.Atl_v3.01_1G021050			SBP	PF03110	SBP domain	1.8e-31	108	PGSC0003DMP400045154	99	3.59e-190
Soltu.Atl_v3.01_2G023850.1	Soltu.Atl_v3.01_2G023850			SBP	PF03110	SBP domain	1.8e-31	108	PGSC0003DMP400045154	98.7	1.46e-189
Soltu.Atl_v3.01_3G019350.1	Soltu.Atl_v3.01_3G019350			SBP	PF03110	SBP domain	1.8e-31	108	PGSC0003DMP400045154	98.7	1.46e-189
Soltu.Atl_v3.01_4G022360.1	Soltu.Atl_v3.01_4G022360			SBP	PF03110	SBP domain	1.8e-31	108	PGSC0003DMP400045154	99	3.59e-190
Soltu.Atl_v3.03_1G000560.1	Soltu.Atl_v3.03_1G000560			MYB	PF00249	Myb-like DNA-binding domain	1.7e-31	108	PGSC0003DMP400023726	98	5.07e-181
Soltu.Atl_v3.03_2G000570.1	Soltu.Atl_v3.03_2G000570			MYB	PF00249	Myb-like DNA-binding domain	1.7e-31	108	PGSC0003DMP400023726	98	5.07e-181
Soltu.Atl_v3.12_0G001230.1	Soltu.Atl_v3.12_0G001230			MYB	PF00249	Myb-like DNA-binding domain	1.6e-31	108	PGSC0003DMP400021429	49.5	2.36e-77
Soltu.Atl_v3.01_0G001390.1	Soltu.Atl_v3.01_0G001390			MYB	PF00249	Myb-like DNA-binding domain	1.6e-31	108.1	PGSC0003DMP400025180	63.4	3e-108
Soltu.Atl_v3.01_0G001560.1	Soltu.Atl_v3.01_0G001560			MYB	PF00249	Myb-like DNA-binding domain	1.6e-31	108.1	PGSC0003DMP400025180	63.4	3e-108
Soltu.Atl_v3.10_0G008600.1	Soltu.Atl_v3.10_0G008600			BES1	PF05687	BES1/BZR1 plant transcription factor, N-terminal	4.5e-31	108.2	PGSC0003DMP400063267	100	2.82e-132
Soltu.Atl_v3.02_3G029720.1	Soltu.Atl_v3.02_3G029720			HSF	PF00447	HSF-type DNA-binding	2.2e-31	108.2	PGSC0003DMP400007176	99.3	2.75e-210
Soltu.Atl_v3.12_3G001830.1	Soltu.Atl_v3.12_3G001830			MYB	PF00249	Myb-like DNA-binding domain	1.5e-31	108.2	PGSC0003DMP400008159	97	3.06e-200
Soltu.Atl_v3.01_4G035910.2	Soltu.Atl_v3.01_4G035910			B3	PF02362	B3 DNA binding domain	1.4e-31	108.2	Solyc01g108930.2.1	87.1	2.42e-161
Soltu.Atl_v3.12_2G002680.1	Soltu.Atl_v3.12_2G002680			MYB	PF00249	Myb-like DNA-binding domain	1.4e-31	108.2	PGSC0003DMP400008159	96	2.04e-195
Soltu.Atl_v3.S126650.1	Soltu.Atl_v3.S126650			BES1	PF05687	BES1/BZR1 plant transcription factor, N-terminal	4e-31	108.3	PGSC0003DMP400063267	97.3	2.6e-128
Soltu.Atl_v3.S126750.1	Soltu.Atl_v3.S126750			BES1	PF05687	BES1/BZR1 plant transcription factor, N-terminal	4e-31	108.3	PGSC0003DMP400063267	97.3	2.6e-128
Soltu.Atl_v3.02_3G015750.1	Soltu.Atl_v3.02_3G015750			HSF	PF00447	HSF-type DNA-binding	2e-31	108.3	PGSC0003DMP400049435	99.8	9.51e-301
Soltu.Atl_v3.02_3G015750.2	Soltu.Atl_v3.02_3G015750			HSF	PF00447	HSF-type DNA-binding	2e-31	108.3	PGSC0003DMP400049435	99.8	9.51e-301
Soltu.Atl_v3.02_3G015750.4	Soltu.Atl_v3.02_3G015750			HSF	PF00447	HSF-type DNA-binding	2e-31	108.3	PGSC0003DMP400049435	99.8	9.51e-301
Soltu.Atl_v3.02_4G013890.1	Soltu.Atl_v3.02_4G013890			HSF	PF00447	HSF-type DNA-binding	2e-31	108.3	PGSC0003DMP400049435	99.8	9.51e-301
Soltu.Atl_v3.02_4G013890.2	Soltu.Atl_v3.02_4G013890			HSF	PF00447	HSF-type DNA-binding	2e-31	108.3	PGSC0003DMP400049435	99.8	9.51e-301
Soltu.Atl_v3.02_4G013890.4	Soltu.Atl_v3.02_4G013890			HSF	PF00447	HSF-type DNA-binding	2e-31	108.3	PGSC0003DMP400049435	99.8	9.51e-301
Soltu.Atl_v3.03_4G014070.1	Soltu.Atl_v3.03_4G014070			HSF	PF00447	HSF-type DNA-binding	2e-31	108.3	PGSC0003DMP400005713	98.2	0
Soltu.Atl_v3.03_2G020430.1	Soltu.Atl_v3.03_2G020430			MYB	PF00249	Myb-like DNA-binding domain	1.4e-31	108.3	PGSC0003DMP400031526	92.4	3.42e-235
Soltu.Atl_v3.03_4G019150.1	Soltu.Atl_v3.03_4G019150			MYB	PF00249	Myb-like DNA-binding domain	1.4e-31	108.3	PGSC0003DMP400031526	98	1.91e-257
Soltu.Atl_v3.12_1G000590.1	Soltu.Atl_v3.12_1G000590			MYB	PF00249	Myb-like DNA-binding domain	1.4e-31	108.3	PGSC0003DMP400008159	100	4.91e-205
Soltu.Atl_v3.12_4G000770.1	Soltu.Atl_v3.12_4G000770			MYB	PF00249	Myb-like DNA-binding domain	1.4e-31	108.3	PGSC0003DMP400008159	100	4.91e-205
Soltu.Atl_v3.03_3G028390.1	Soltu.Atl_v3.03_3G028390			MYB	PF00249	Myb-like DNA-binding domain	1.3e-31	108.3	PGSC0003DMP400031526	97.7	4.51e-258
Soltu.Atl_v3.05_4G008680.1	Soltu.Atl_v3.05_4G008680			SBP	PF03110	SBP domain	1.4e-31	108.4	PGSC0003DMP400056411	98.7	0
Soltu.Atl_v3.05_4G008680.2	Soltu.Atl_v3.05_4G008680			SBP	PF03110	SBP domain	1.4e-31	108.4	PGSC0003DMP400056411	98.7	0
Soltu.Atl_v3.05_4G008680.4	Soltu.Atl_v3.05_4G008680			SBP	PF03110	SBP domain	1.4e-31	108.4	PGSC0003DMP400056411	98.7	0
Soltu.Atl_v3.05_4G008680.5	Soltu.Atl_v3.05_4G008680			SBP	PF03110	SBP domain	1.4e-31	108.4	PGSC0003DMP400056411	98.7	0
Soltu.Atl_v3.05_4G008680.8	Soltu.Atl_v3.05_4G008680			SBP	PF03110	SBP domain	1.4e-31	108.4	PGSC0003DMP400056411	98.7	0
Soltu.Atl_v3.02_3G017050.1	Soltu.Atl_v3.02_3G017050			TCP	PF03634	TCP family transcription factor	4e-31	108.5	PGSC0003DMP400039819	100	1.4e-235
Soltu.Atl_v3.05_1G011070.1	Soltu.Atl_v3.05_1G011070			SBP	PF03110	SBP domain	1.3e-31	108.5	PGSC0003DMP400056411	100	0
Soltu.Atl_v3.05_1G011070.10	Soltu.Atl_v3.05_1G011070			SBP	PF03110	SBP domain	1.3e-31	108.5	PGSC0003DMP400056411	100	0
Soltu.Atl_v3.05_1G011070.2	Soltu.Atl_v3.05_1G011070			SBP	PF03110	SBP domain	1.3e-31	108.5	PGSC0003DMP400056411	100	0
Soltu.Atl_v3.05_1G011070.3	Soltu.Atl_v3.05_1G011070			SBP	PF03110	SBP domain	1.3e-31	108.5	PGSC0003DMP400056411	100	0
Soltu.Atl_v3.05_1G011070.4	Soltu.Atl_v3.05_1G011070			SBP	PF03110	SBP domain	1.3e-31	108.5	PGSC0003DMP400056411	100	0
Soltu.Atl_v3.05_1G011070.6	Soltu.Atl_v3.05_1G011070			SBP	PF03110	SBP domain	1.3e-31	108.5	PGSC0003DMP400056411	100	0
Soltu.Atl_v3.05_1G011070.7	Soltu.Atl_v3.05_1G011070			SBP	PF03110	SBP domain	1.3e-31	108.5	PGSC0003DMP400056411	100	0
Soltu.Atl_v3.05_1G011070.8	Soltu.Atl_v3.05_1G011070			SBP	PF03110	SBP domain	1.3e-31	108.5	PGSC0003DMP400056411	100	0
Soltu.Atl_v3.05_2G010600.1	Soltu.Atl_v3.05_2G010600			SBP	PF03110	SBP domain	1.3e-31	108.5	PGSC0003DMP400056411	100	0
Soltu.Atl_v3.05_2G010600.2	Soltu.Atl_v3.05_2G010600			SBP	PF03110	SBP domain	1.3e-31	108.5	PGSC0003DMP400056411	100	0
Soltu.Atl_v3.05_2G010600.3	Soltu.Atl_v3.05_2G010600			SBP	PF03110	SBP domain	1.3e-31	108.5	PGSC0003DMP400056411	100	0
Soltu.Atl_v3.05_2G010600.5	Soltu.Atl_v3.05_2G010600			SBP	PF03110	SBP domain	1.3e-31	108.5	PGSC0003DMP400056411	100	0
Soltu.Atl_v3.05_2G010600.6	Soltu.Atl_v3.05_2G010600			SBP	PF03110	SBP domain	1.3e-31	108.5	PGSC0003DMP400056411	100	0
Soltu.Atl_v3.05_2G010600.7	Soltu.Atl_v3.05_2G010600			SBP	PF03110	SBP domain	1.3e-31	108.5	PGSC0003DMP400056411	100	0
Soltu.Atl_v3.05_2G010600.9	Soltu.Atl_v3.05_2G010600			SBP	PF03110	SBP domain	1.3e-31	108.5	PGSC0003DMP400056411	100	0
Soltu.Atl_v3.05_3G010700.1	Soltu.Atl_v3.05_3G010700			SBP	PF03110	SBP domain	1.3e-31	108.5	PGSC0003DMP400056411	98.5	0
Soltu.Atl_v3.05_3G010700.2	Soltu.Atl_v3.05_3G010700			SBP	PF03110	SBP domain	1.3e-31	108.5	PGSC0003DMP400056411	98.5	0
Soltu.Atl_v3.05_3G010700.3	Soltu.Atl_v3.05_3G010700			SBP	PF03110	SBP domain	1.3e-31	108.5	PGSC0003DMP400056411	98.5	0
Soltu.Atl_v3.05_3G010700.6	Soltu.Atl_v3.05_3G010700			SBP	PF03110	SBP domain	1.3e-31	108.5	PGSC0003DMP400056411	98.5	0
Soltu.Atl_v3.05_3G010700.7	Soltu.Atl_v3.05_3G010700			SBP	PF03110	SBP domain	1.3e-31	108.5	PGSC0003DMP400056411	98.5	0
Soltu.Atl_v3.05_3G010700.8	Soltu.Atl_v3.05_3G010700			SBP	PF03110	SBP domain	1.3e-31	108.5	PGSC0003DMP400056411	98.5	0
Soltu.Atl_v3.07_1G012430.2	Soltu.Atl_v3.07_1G012430			B3	PF02362	B3 DNA binding domain	1.2e-31	108.5	PGSC0003DMP400032011	98.3	1.05e-283
Soltu.Atl_v3.07_1G012430.6	Soltu.Atl_v3.07_1G012430			B3	PF02362	B3 DNA binding domain	1.2e-31	108.5	PGSC0003DMP400032011	98.3	1.05e-283
Soltu.Atl_v3.08_1G015540.1	Soltu.Atl_v3.08_1G015540			MYB	PF00249	Myb-like DNA-binding domain	1.1e-31	108.5	PGSC0003DMP400008480	97.5	1.64e-178
Soltu.Atl_v3.08_2G017590.1	Soltu.Atl_v3.08_2G017590			MYB	PF00249	Myb-like DNA-binding domain	1.1e-31	108.5	PGSC0003DMP400008480	97.9	2.84e-179
Soltu.Atl_v3.10_2G008570.2	Soltu.Atl_v3.10_2G008570			MYB	PF00249	Myb-like DNA-binding domain	1.1e-31	108.5	Solyc10g086290.1.1	88	1.92e-170
Soltu.Atl_v3.10_2G008570.3	Soltu.Atl_v3.10_2G008570			MYB	PF00249	Myb-like DNA-binding domain	1.1e-31	108.5	Solyc10g086290.1.1	88	1.92e-170
MSTRG.11783.2	Soltu.Atl_v3.02_1G026080			HSF	PF00447	HSF-type DNA-binding	1.7e-31	108.6	PGSC0003DMP400007176	99.3	1.12e-209
MSTRG.21341.11	Soltu.Atl_v3.03_2G001010			HSF	PF00447	HSF-type DNA-binding	1.7e-31	108.6	PGSC0003DMP400048369	99.3	4.09e-288
Soltu.Atl_v3.02_1G026080.1	Soltu.Atl_v3.02_1G026080			HSF	PF00447	HSF-type DNA-binding	1.7e-31	108.6	PGSC0003DMP400007176	99.3	1.12e-209
Soltu.Atl_v3.03_1G001000.1	Soltu.Atl_v3.03_1G001000			HSF	PF00447	HSF-type DNA-binding	1.7e-31	108.6	PGSC0003DMP400048369	99.3	4.09e-288
Soltu.Atl_v3.03_1G001000.10	Soltu.Atl_v3.03_1G001000			HSF	PF00447	HSF-type DNA-binding	1.7e-31	108.6	PGSC0003DMP400048369	99.3	4.09e-288
Soltu.Atl_v3.03_1G001000.2	Soltu.Atl_v3.03_1G001000			HSF	PF00447	HSF-type DNA-binding	1.7e-31	108.6	PGSC0003DMP400048369	99.3	4.09e-288
Soltu.Atl_v3.03_1G001000.3	Soltu.Atl_v3.03_1G001000			HSF	PF00447	HSF-type DNA-binding	1.7e-31	108.6	PGSC0003DMP400048369	99.3	4.09e-288
Soltu.Atl_v3.03_1G001000.4	Soltu.Atl_v3.03_1G001000			HSF	PF00447	HSF-type DNA-binding	1.7e-31	108.6	PGSC0003DMP400048369	99.3	4.09e-288
Soltu.Atl_v3.03_1G001000.5	Soltu.Atl_v3.03_1G001000			HSF	PF00447	HSF-type DNA-binding	1.7e-31	108.6	PGSC0003DMP400048369	99.3	4.09e-288
Soltu.Atl_v3.03_1G001000.7	Soltu.Atl_v3.03_1G001000			HSF	PF00447	HSF-type DNA-binding	1.7e-31	108.6	PGSC0003DMP400048369	99.3	4.09e-288
Soltu.Atl_v3.03_1G001000.8	Soltu.Atl_v3.03_1G001000			HSF	PF00447	HSF-type DNA-binding	1.7e-31	108.6	PGSC0003DMP400048369	99.3	4.09e-288
Soltu.Atl_v3.03_2G001010.1	Soltu.Atl_v3.03_2G001010			HSF	PF00447	HSF-type DNA-binding	1.7e-31	108.6	PGSC0003DMP400048369	99.3	4.09e-288
Soltu.Atl_v3.03_2G001010.10	Soltu.Atl_v3.03_2G001010			HSF	PF00447	HSF-type DNA-binding	1.7e-31	108.6	PGSC0003DMP400048369	99.3	4.09e-288
Soltu.Atl_v3.03_2G001010.2	Soltu.Atl_v3.03_2G001010			HSF	PF00447	HSF-type DNA-binding	1.7e-31	108.6	PGSC0003DMP400048369	99.3	4.09e-288
Soltu.Atl_v3.03_2G001010.3	Soltu.Atl_v3.03_2G001010			HSF	PF00447	HSF-type DNA-binding	1.7e-31	108.6	PGSC0003DMP400048369	99.3	4.09e-288
Soltu.Atl_v3.03_2G001010.4	Soltu.Atl_v3.03_2G001010			HSF	PF00447	HSF-type DNA-binding	1.7e-31	108.6	PGSC0003DMP400048369	99.3	4.09e-288
Soltu.Atl_v3.03_2G001010.5	Soltu.Atl_v3.03_2G001010			HSF	PF00447	HSF-type DNA-binding	1.7e-31	108.6	PGSC0003DMP400048369	99.3	4.09e-288
Soltu.Atl_v3.03_2G001010.7	Soltu.Atl_v3.03_2G001010			HSF	PF00447	HSF-type DNA-binding	1.7e-31	108.6	PGSC0003DMP400048369	99.3	4.09e-288
Soltu.Atl_v3.03_2G001010.8	Soltu.Atl_v3.03_2G001010			HSF	PF00447	HSF-type DNA-binding	1.7e-31	108.6	PGSC0003DMP400048369	99.3	4.09e-288
Soltu.Atl_v3.03_4G001090.1	Soltu.Atl_v3.03_4G001090			HSF	PF00447	HSF-type DNA-binding	1.7e-31	108.6	PGSC0003DMP400048369	99.8	2.12e-290
Soltu.Atl_v3.03_4G001090.2	Soltu.Atl_v3.03_4G001090			HSF	PF00447	HSF-type DNA-binding	1.7e-31	108.6	PGSC0003DMP400048369	99.8	2.12e-290
Soltu.Atl_v3.03_4G001090.3	Soltu.Atl_v3.03_4G001090			HSF	PF00447	HSF-type DNA-binding	1.7e-31	108.6	PGSC0003DMP400048369	99.8	2.12e-290
Soltu.Atl_v3.03_4G001090.4	Soltu.Atl_v3.03_4G001090			HSF	PF00447	HSF-type DNA-binding	1.7e-31	108.6	PGSC0003DMP400048369	99.8	2.12e-290
Soltu.Atl_v3.03_4G001090.5	Soltu.Atl_v3.03_4G001090			HSF	PF00447	HSF-type DNA-binding	1.7e-31	108.6	PGSC0003DMP400048369	99.8	2.12e-290
Soltu.Atl_v3.03_4G001090.6	Soltu.Atl_v3.03_4G001090			HSF	PF00447	HSF-type DNA-binding	1.7e-31	108.6	PGSC0003DMP400048369	99.8	2.12e-290
Soltu.Atl_v3.03_4G001090.7	Soltu.Atl_v3.03_4G001090			HSF	PF00447	HSF-type DNA-binding	1.7e-31	108.6	PGSC0003DMP400048369	99.8	2.12e-290
Soltu.Atl_v3.03_4G001090.8	Soltu.Atl_v3.03_4G001090			HSF	PF00447	HSF-type DNA-binding	1.7e-31	108.6	PGSC0003DMP400048369	99.8	2.12e-290
Soltu.Atl_v3.09_3G002230.11	Soltu.Atl_v3.09_3G002230			HSF	PF00447	HSF-type DNA-binding	1.7e-31	108.6	PGSC0003DMP400004805	99.2	0
Soltu.Atl_v3.09_3G002230.2	Soltu.Atl_v3.09_3G002230			HSF	PF00447	HSF-type DNA-binding	1.7e-31	108.6	PGSC0003DMP400004805	99.2	0
Soltu.Atl_v3.09_3G002230.3	Soltu.Atl_v3.09_3G002230			HSF	PF00447	HSF-type DNA-binding	1.7e-31	108.6	PGSC0003DMP400004805	99.2	0
Soltu.Atl_v3.09_3G002230.4	Soltu.Atl_v3.09_3G002230			HSF	PF00447	HSF-type DNA-binding	1.7e-31	108.6	PGSC0003DMP400004805	99.2	0
Soltu.Atl_v3.09_3G002230.5	Soltu.Atl_v3.09_3G002230			HSF	PF00447	HSF-type DNA-binding	1.7e-31	108.6	PGSC0003DMP400004805	99.2	0
Soltu.Atl_v3.04_0G001550.1	Soltu.Atl_v3.04_0G001550			HSF	PF00447	HSF-type DNA-binding	1.6e-31	108.6	PGSC0003DMP400047457	98.4	1.87e-135
Soltu.Atl_v3.04_3G009240.1	Soltu.Atl_v3.04_3G009240			HSF	PF00447	HSF-type DNA-binding	1.6e-31	108.6	PGSC0003DMP400047457	100	2.41e-140
Soltu.Atl_v3.08_1G017730.1	Soltu.Atl_v3.08_1G017730			AP2	PF00847	AP2 domain	1.2e-31	108.6	PGSC0003DMP400021524	49.7	4.31e-115
Soltu.Atl_v3.07_1G012130.1	Soltu.Atl_v3.07_1G012130			MYB	PF00249	Myb-like DNA-binding domain	1.1e-31	108.6	PGSC0003DMP400045418	82	3.4e-136
Soltu.Atl_v3.07_3G015120.1	Soltu.Atl_v3.07_3G015120			MYB	PF00249	Myb-like DNA-binding domain	1.1e-31	108.6	PGSC0003DMP400045418	91.6	9.39e-73
Soltu.Atl_v3.10_4G005360.1	Soltu.Atl_v3.10_4G005360			MYB	PF00249	Myb-like DNA-binding domain	1.1e-31	108.6	Solyc10g086290.1.1	88.5	4.95e-174
Soltu.Atl_v3.S064810.1	Soltu.Atl_v3.S064810			MYB	PF00249	Myb-like DNA-binding domain	1.1e-31	108.6	Sme2.5_05099.1_g00002.1	61.5	3.68e-98
Soltu.Atl_v3.02_2G015260.1	Soltu.Atl_v3.02_2G015260			HSF	PF00447	HSF-type DNA-binding	1.6e-31	108.7	PGSC0003DMP400049435	98.8	9.11e-299
Soltu.Atl_v3.02_2G015260.2	Soltu.Atl_v3.02_2G015260			HSF	PF00447	HSF-type DNA-binding	1.6e-31	108.7	PGSC0003DMP400049435	98.8	9.11e-299
Soltu.Atl_v3.02_2G015260.3	Soltu.Atl_v3.02_2G015260			HSF	PF00447	HSF-type DNA-binding	1.6e-31	108.7	PGSC0003DMP400049435	98.8	9.11e-299
Soltu.Atl_v3.02_2G015260.4	Soltu.Atl_v3.02_2G015260			HSF	PF00447	HSF-type DNA-binding	1.6e-31	108.7	PGSC0003DMP400049435	98.8	9.11e-299
Soltu.Atl_v3.02_2G015260.5	Soltu.Atl_v3.02_2G015260			HSF	PF00447	HSF-type DNA-binding	1.6e-31	108.7	PGSC0003DMP400049435	98.8	9.11e-299
MSTRG.23056.11	Soltu.Atl_v3.03_3G001200			HSF	PF00447	HSF-type DNA-binding	1.5e-31	108.7	PGSC0003DMP400048369	98.5	2.76e-286
MSTRG.23056.12	Soltu.Atl_v3.03_3G001200			HSF	PF00447	HSF-type DNA-binding	1.5e-31	108.7	PGSC0003DMP400048369	98.5	2.76e-286
MSTRG.23056.13	Soltu.Atl_v3.03_3G001200			HSF	PF00447	HSF-type DNA-binding	1.5e-31	108.7	PGSC0003DMP400048369	98.5	2.76e-286
Soltu.Atl_v3.02_1G012440.1	Soltu.Atl_v3.02_1G012440			HSF	PF00447	HSF-type DNA-binding	1.5e-31	108.7	PGSC0003DMP400049435	98	2.15e-297
Soltu.Atl_v3.03_3G001200.1	Soltu.Atl_v3.03_3G001200			HSF	PF00447	HSF-type DNA-binding	1.5e-31	108.7	PGSC0003DMP400048369	98.5	2.76e-286
Soltu.Atl_v3.03_3G001200.2	Soltu.Atl_v3.03_3G001200			HSF	PF00447	HSF-type DNA-binding	1.5e-31	108.7	PGSC0003DMP400048369	98.5	2.76e-286
Soltu.Atl_v3.03_3G001200.3	Soltu.Atl_v3.03_3G001200			HSF	PF00447	HSF-type DNA-binding	1.5e-31	108.7	PGSC0003DMP400048369	98.5	2.76e-286
Soltu.Atl_v3.03_3G001200.4	Soltu.Atl_v3.03_3G001200			HSF	PF00447	HSF-type DNA-binding	1.5e-31	108.7	PGSC0003DMP400048369	98.5	2.76e-286
Soltu.Atl_v3.03_3G001200.5	Soltu.Atl_v3.03_3G001200			HSF	PF00447	HSF-type DNA-binding	1.5e-31	108.7	PGSC0003DMP400048369	98.5	2.76e-286
Soltu.Atl_v3.03_3G001200.6	Soltu.Atl_v3.03_3G001200			HSF	PF00447	HSF-type DNA-binding	1.5e-31	108.7	PGSC0003DMP400048369	98.5	2.76e-286
Soltu.Atl_v3.03_3G001200.7	Soltu.Atl_v3.03_3G001200			HSF	PF00447	HSF-type DNA-binding	1.5e-31	108.7	PGSC0003DMP400048369	98.5	2.76e-286
Soltu.Atl_v3.03_3G001200.8	Soltu.Atl_v3.03_3G001200			HSF	PF00447	HSF-type DNA-binding	1.5e-31	108.7	PGSC0003DMP400048369	98.5	2.76e-286
Soltu.Atl_v3.03_3G001200.9	Soltu.Atl_v3.03_3G001200			HSF	PF00447	HSF-type DNA-binding	1.5e-31	108.7	PGSC0003DMP400048369	98.5	2.76e-286
Soltu.Atl_v3.12_3G002610.2	Soltu.Atl_v3.12_3G002610			HSF	PF00447	HSF-type DNA-binding	1.5e-31	108.7	PGSC0003DMP400008251	97.7	0
Soltu.Atl_v3.05_1G011070.11	Soltu.Atl_v3.05_1G011070			SBP	PF03110	SBP domain	1.1e-31	108.7	PGSC0003DMP400056410	100	7.36e-289
Soltu.Atl_v3.05_1G011070.5	Soltu.Atl_v3.05_1G011070			SBP	PF03110	SBP domain	1.1e-31	108.7	PGSC0003DMP400056410	100	7.36e-289
Soltu.Atl_v3.05_1G011070.9	Soltu.Atl_v3.05_1G011070			SBP	PF03110	SBP domain	1.1e-31	108.7	PGSC0003DMP400056410	100	7.36e-289
Soltu.Atl_v3.05_2G010600.4	Soltu.Atl_v3.05_2G010600			SBP	PF03110	SBP domain	1.1e-31	108.7	PGSC0003DMP400056410	99.8	4.26e-288
Soltu.Atl_v3.05_2G010600.8	Soltu.Atl_v3.05_2G010600			SBP	PF03110	SBP domain	1.1e-31	108.7	PGSC0003DMP400056410	99.8	4.26e-288
Soltu.Atl_v3.05_3G010700.10	Soltu.Atl_v3.05_3G010700			SBP	PF03110	SBP domain	1.1e-31	108.7	PGSC0003DMP400056410	98	2.94e-279
Soltu.Atl_v3.05_3G010700.4	Soltu.Atl_v3.05_3G010700			SBP	PF03110	SBP domain	1.1e-31	108.7	PGSC0003DMP400056410	98	2.94e-279
Soltu.Atl_v3.05_3G010700.9	Soltu.Atl_v3.05_3G010700			SBP	PF03110	SBP domain	1.1e-31	108.7	PGSC0003DMP400056410	98	2.94e-279
Soltu.Atl_v3.05_4G008680.6	Soltu.Atl_v3.05_4G008680			SBP	PF03110	SBP domain	1.1e-31	108.7	PGSC0003DMP400056410	98.3	8.8e-281
Soltu.Atl_v3.05_4G008680.7	Soltu.Atl_v3.05_4G008680			SBP	PF03110	SBP domain	1.1e-31	108.7	PGSC0003DMP400056410	98.3	8.8e-281
Soltu.Atl_v3.05_4G008680.9	Soltu.Atl_v3.05_4G008680			SBP	PF03110	SBP domain	1.1e-31	108.7	PGSC0003DMP400056410	98.3	8.8e-281
Soltu.Atl_v3.07_1G013510.2	Soltu.Atl_v3.07_1G013510			SBP	PF03110	SBP domain	1.1e-31	108.7	PGSC0003DMP400055718	97.6	4.61e-70
Soltu.Atl_v3.01_4G035990.2	Soltu.Atl_v3.01_4G035990			B3	PF02362	B3 DNA binding domain	1e-31	108.7	PGSC0003DMP400044806	91.5	5.88e-214
Soltu.Atl_v3.07_1G012430.3	Soltu.Atl_v3.07_1G012430			B3	PF02362	B3 DNA binding domain	9.7e-32	108.7	PGSC0003DMP400032011	98.4	2.17e-262
Soltu.Atl_v3.07_1G012430.4	Soltu.Atl_v3.07_1G012430			B3	PF02362	B3 DNA binding domain	9.7e-32	108.7	PGSC0003DMP400032011	98.4	2.17e-262
Soltu.Atl_v3.07_1G012430.7	Soltu.Atl_v3.07_1G012430			B3	PF02362	B3 DNA binding domain	9.7e-32	108.7	PGSC0003DMP400032011	98.4	2.17e-262
Soltu.Atl_v3.07_1G012430.9	Soltu.Atl_v3.07_1G012430			B3	PF02362	B3 DNA binding domain	9.7e-32	108.7	PGSC0003DMP400032011	98.4	2.17e-262
MSTRG.10059.3	Soltu.Atl_v3.02_0G004120			NAC	PF02365	No apical meristem (NAM) protein	1.6e-31	108.8	PGSC0003DMP400002397	96.1	6.38e-84
MSTRG.18283.1	Soltu.Atl_v3.02_4G023410			NAC	PF02365	No apical meristem (NAM) protein	1.6e-31	108.8	PGSC0003DMP400002397	92.9	6.76e-78
Soltu.Atl_v3.09_0G004360.1	Soltu.Atl_v3.09_0G004360			HSF	PF00447	HSF-type DNA-binding	1.4e-31	108.8	PGSC0003DMP400004805	99.6	0
Soltu.Atl_v3.09_0G004360.8	Soltu.Atl_v3.09_0G004360			HSF	PF00447	HSF-type DNA-binding	1.4e-31	108.8	PGSC0003DMP400004805	99.6	0
Soltu.Atl_v3.09_2G003880.1	Soltu.Atl_v3.09_2G003880			HSF	PF00447	HSF-type DNA-binding	1.4e-31	108.8	PGSC0003DMP400004805	99.6	0
Soltu.Atl_v3.09_2G003880.12	Soltu.Atl_v3.09_2G003880			HSF	PF00447	HSF-type DNA-binding	1.4e-31	108.8	PGSC0003DMP400004805	99.6	0
Soltu.Atl_v3.09_2G003880.2	Soltu.Atl_v3.09_2G003880			HSF	PF00447	HSF-type DNA-binding	1.4e-31	108.8	PGSC0003DMP400004805	99.6	0
Soltu.Atl_v3.09_2G003880.3	Soltu.Atl_v3.09_2G003880			HSF	PF00447	HSF-type DNA-binding	1.4e-31	108.8	PGSC0003DMP400004805	99.6	0
Soltu.Atl_v3.09_4G002560.1	Soltu.Atl_v3.09_4G002560			HSF	PF00447	HSF-type DNA-binding	1.4e-31	108.8	PGSC0003DMP400004805	99.6	0
Soltu.Atl_v3.09_4G002560.12	Soltu.Atl_v3.09_4G002560			HSF	PF00447	HSF-type DNA-binding	1.4e-31	108.8	PGSC0003DMP400004805	99.6	0
Soltu.Atl_v3.09_4G002560.2	Soltu.Atl_v3.09_4G002560			HSF	PF00447	HSF-type DNA-binding	1.4e-31	108.8	PGSC0003DMP400004805	99.6	0
Soltu.Atl_v3.09_4G002560.3	Soltu.Atl_v3.09_4G002560			HSF	PF00447	HSF-type DNA-binding	1.4e-31	108.8	PGSC0003DMP400004805	99.6	0
Soltu.Atl_v3.02_2G031980.1	Soltu.Atl_v3.02_2G031980			Dof	PF02701	Dof domain, zinc finger	9.4e-32	108.8	PGSC0003DMP400002387	96.8	0
Soltu.Atl_v3.02_2G031980.2	Soltu.Atl_v3.02_2G031980			Dof	PF02701	Dof domain, zinc finger	9.4e-32	108.8	PGSC0003DMP400002387	96.8	0
Soltu.Atl_v3.10_4G005430.1	Soltu.Atl_v3.10_4G005430			MYB	PF00249	Myb-like DNA-binding domain	9.4e-32	108.8	Sopen10g035640.1	88.8	4.46e-180
Soltu.Atl_v3.02_1G028810.1	Soltu.Atl_v3.02_1G028810			Dof	PF02701	Dof domain, zinc finger	9.3e-32	108.8	PGSC0003DMP400002387	96.8	0
Soltu.Atl_v3.02_1G028810.2	Soltu.Atl_v3.02_1G028810			Dof	PF02701	Dof domain, zinc finger	9.3e-32	108.8	PGSC0003DMP400002387	96.8	0
Soltu.Atl_v3.02_4G023490.1	Soltu.Atl_v3.02_4G023490			Dof	PF02701	Dof domain, zinc finger	9.3e-32	108.8	PGSC0003DMP400002387	100	0
Soltu.Atl_v3.10_2G008620.2	Soltu.Atl_v3.10_2G008620			MYB	PF00249	Myb-like DNA-binding domain	9.2e-32	108.8	Sopen10g035640.1	88.1	1.32e-176
Soltu.Atl_v3.06_0G001980.1	Soltu.Atl_v3.06_0G001980			MYB	PF00249	Myb-like DNA-binding domain	9.1e-32	108.8	PGSC0003DMP400019227	94.6	1.08e-103
Soltu.Atl_v3.S039260.1	Soltu.Atl_v3.S039260			MYB	PF00249	Myb-like DNA-binding domain	9.1e-32	108.8	PGSC0003DMP400019227	94.6	1.08e-103
Soltu.Atl_v3.02_0G004200.1	Soltu.Atl_v3.02_0G004200			Dof	PF02701	Dof domain, zinc finger	9.2e-32	108.9	PGSC0003DMP400002387	99.6	0
Soltu.Atl_v3.01_2G002970.1	Soltu.Atl_v3.01_2G002970			Dof	PF02701	Dof domain, zinc finger	9e-32	108.9	PGSC0003DMP400037029	80.5	5.2e-178
Soltu.Atl_v3.01_4G003040.1	Soltu.Atl_v3.01_4G003040			Dof	PF02701	Dof domain, zinc finger	9e-32	108.9	PGSC0003DMP400037029	78.9	4.99e-177
Soltu.Atl_v3.S050470.1	Soltu.Atl_v3.S050470			MYB	PF00249	Myb-like DNA-binding domain	9e-32	108.9	Sme2.5_05099.1_g00002.1	61.9	8.6e-96
Soltu.Atl_v3.01_1G002880.1	Soltu.Atl_v3.01_1G002880			Dof	PF02701	Dof domain, zinc finger	8.9e-32	108.9	PGSC0003DMP400037029	82.4	1.49e-177
Soltu.Atl_v3.01_4G003050.1	Soltu.Atl_v3.01_4G003050			Dof	PF02701	Dof domain, zinc finger	8.8e-32	108.9	PGSC0003DMP400037029	93.3	3.67e-221
Soltu.Atl_v3.01_3G002970.1	Soltu.Atl_v3.01_3G002970			Dof	PF02701	Dof domain, zinc finger	8.7e-32	108.9	PGSC0003DMP400037029	94.6	1.39e-225
Soltu.Atl_v3.04_2G007120.1	Soltu.Atl_v3.04_2G007120			HSF	PF00447	HSF-type DNA-binding	1.2e-31	109	PGSC0003DMP400047457	97.4	9.29e-121
Soltu.Atl_v3.03_2G022630.1	Soltu.Atl_v3.03_2G022630			SBP	PF03110	SBP domain	8.9e-32	109	PGSC0003DMP400042430	93.7	0
Soltu.Atl_v3.03_2G022630.2	Soltu.Atl_v3.03_2G022630			SBP	PF03110	SBP domain	8.9e-32	109	PGSC0003DMP400042430	93.7	0
Soltu.Atl_v3.03_2G022630.3	Soltu.Atl_v3.03_2G022630			SBP	PF03110	SBP domain	8.9e-32	109	PGSC0003DMP400042430	93.7	0
Soltu.Atl_v3.03_2G022630.4	Soltu.Atl_v3.03_2G022630			SBP	PF03110	SBP domain	8.9e-32	109	PGSC0003DMP400042430	93.7	0
Soltu.Atl_v3.01_2G006050.1	Soltu.Atl_v3.01_2G006050			MYB	PF00249	Myb-like DNA-binding domain	8.3e-32	109	PGSC0003DMP400039334	98.3	0
Soltu.Atl_v3.01_3G005410.1	Soltu.Atl_v3.01_3G005410			MYB	PF00249	Myb-like DNA-binding domain	8.3e-32	109	PGSC0003DMP400039334	98.5	0
Soltu.Atl_v3.01_4G005830.1	Soltu.Atl_v3.01_4G005830			MYB	PF00249	Myb-like DNA-binding domain	8.3e-32	109	PGSC0003DMP400039334	98.1	0
Soltu.Atl_v3.08_1G019130.2	Soltu.Atl_v3.08_1G019130			MYB	PF00249	Myb-like DNA-binding domain	8.3e-32	109	PGSC0003DMP400021429	99.3	3.9e-200
Soltu.Atl_v3.10_0G010250.1	Soltu.Atl_v3.10_0G010250			MYB	PF00249	Myb-like DNA-binding domain	8.3e-32	109	Sopen10g035640.1	88.5	3.13e-178
Soltu.Atl_v3.05_2G004750.2	Soltu.Atl_v3.05_2G004750			MYB	PF00249	Myb-like DNA-binding domain	8.2e-32	109	PGSC0003DMP400032103	100	6.25e-303
MSTRG.3544.1	Soltu.Atl_v3.01_2G006050			MYB	PF00249	Myb-like DNA-binding domain	8.1e-32	109	PGSC0003DMP400039334	98.3	0
MSTRG.3544.8	Soltu.Atl_v3.01_2G006050			MYB	PF00249	Myb-like DNA-binding domain	8.1e-32	109	PGSC0003DMP400039334	98.3	0
Soltu.Atl_v3.01_2G006050.2	Soltu.Atl_v3.01_2G006050			MYB	PF00249	Myb-like DNA-binding domain	8.1e-32	109	PGSC0003DMP400039334	98.3	0
Soltu.Atl_v3.01_2G006050.4	Soltu.Atl_v3.01_2G006050			MYB	PF00249	Myb-like DNA-binding domain	8.1e-32	109	PGSC0003DMP400039334	98.3	0
Soltu.Atl_v3.01_3G005410.3	Soltu.Atl_v3.01_3G005410			MYB	PF00249	Myb-like DNA-binding domain	8.1e-32	109	PGSC0003DMP400039334	98.5	0
Soltu.Atl_v3.01_3G005410.5	Soltu.Atl_v3.01_3G005410			MYB	PF00249	Myb-like DNA-binding domain	8.1e-32	109	PGSC0003DMP400039334	98.5	0
Soltu.Atl_v3.01_4G005830.3	Soltu.Atl_v3.01_4G005830			MYB	PF00249	Myb-like DNA-binding domain	8.1e-32	109	PGSC0003DMP400039334	98.1	0
Soltu.Atl_v3.01_4G005830.4	Soltu.Atl_v3.01_4G005830			MYB	PF00249	Myb-like DNA-binding domain	8.1e-32	109	PGSC0003DMP400039334	98.1	0
Soltu.Atl_v3.05_0G001870.1	Soltu.Atl_v3.05_0G001870			MYB	PF00249	Myb-like DNA-binding domain	8e-32	109	PGSC0003DMP400032103	97.9	2.43e-295
Soltu.Atl_v3.05_4G004920.1	Soltu.Atl_v3.05_4G004920			MYB	PF00249	Myb-like DNA-binding domain	8e-32	109	PGSC0003DMP400032103	97.9	2.43e-295
Soltu.Atl_v3.12_3G011350.1	Soltu.Atl_v3.12_3G011350			SBP	PF03110	SBP domain	8.1e-32	109.1	PGSC0003DMP400040233	99.8	0
Soltu.Atl_v3.12_3G011350.2	Soltu.Atl_v3.12_3G011350			SBP	PF03110	SBP domain	8.1e-32	109.1	PGSC0003DMP400040233	99.8	0
Soltu.Atl_v3.05_2G004750.1	Soltu.Atl_v3.05_2G004750			MYB	PF00249	Myb-like DNA-binding domain	7.6e-32	109.1	PGSC0003DMP400032103	96.5	4.87e-287
Soltu.Atl_v3.01_4G035990.1	Soltu.Atl_v3.01_4G035990			B3	PF02362	B3 DNA binding domain	7.2e-32	109.1	PGSC0003DMP400044806	80.4	2.16e-176
Soltu.Atl_v3.01_1G002890.1	Soltu.Atl_v3.01_1G002890			Dof	PF02701	Dof domain, zinc finger	7.1e-32	109.2	PGSC0003DMP400037029	83.1	1.92e-184
Soltu.Atl_v3.01_2G002980.1	Soltu.Atl_v3.01_2G002980			Dof	PF02701	Dof domain, zinc finger	7.1e-32	109.2	PGSC0003DMP400037029	86.9	3.17e-197
Soltu.Atl_v3.10_1G009600.1	Soltu.Atl_v3.10_1G009600			MYB	PF00249	Myb-like DNA-binding domain	7.1e-32	109.2	PGSC0003DMP400048854	100	3.89e-215
Soltu.Atl_v3.10_2G013120.1	Soltu.Atl_v3.10_2G013120			MYB	PF00249	Myb-like DNA-binding domain	7.1e-32	109.2	PGSC0003DMP400048854	100	3.89e-215
Soltu.Atl_v3.10_4G006720.1	Soltu.Atl_v3.10_4G006720			MYB	PF00249	Myb-like DNA-binding domain	7.1e-32	109.2	PGSC0003DMP400048854	100	3.89e-215
Soltu.Atl_v3.10_4G006740.1	Soltu.Atl_v3.10_4G006740			MYB	PF00249	Myb-like DNA-binding domain	7.1e-32	109.2	PGSC0003DMP400048854	100	3.89e-215
Soltu.Atl_v3.S126870.1	Soltu.Atl_v3.S126870			MYB	PF00249	Myb-like DNA-binding domain	7.1e-32	109.2	PGSC0003DMP400048854	100	3.89e-215
Soltu.Atl_v3.06_3G019830.1	Soltu.Atl_v3.06_3G019830			E2F/DP	PF02319	E2F/DP family winged-helix DNA-binding domain	6.6e-32	109.2	PGSC0003DMP400010520	96	1.02e-280
Soltu.Atl_v3.06_3G001510.3	Soltu.Atl_v3.06_3G001510			C3H	PF00642	Zinc finger C-x8-C-x5-C-x3-H type (and similar)	4.5e-32	109.2	PGSC0003DMP400009444	100	1.27e-173
Soltu.Atl_v3.08_2G014320.1	Soltu.Atl_v3.08_2G014320			HSF	PF00447	HSF-type DNA-binding	9.9e-32	109.3	PGSC0003DMP400026069	100	0
Soltu.Atl_v3.08_2G014320.4	Soltu.Atl_v3.08_2G014320			HSF	PF00447	HSF-type DNA-binding	9.9e-32	109.3	PGSC0003DMP400026069	100	0
Soltu.Atl_v3.02_1G028560.2	Soltu.Atl_v3.02_1G028560			WRKY	PF03106	WRKY DNA -binding domain	7.5e-32	109.3	PGSC0003DMP400002598	96.3	9.79e-283
Soltu.Atl_v3.10_1G011060.1	Soltu.Atl_v3.10_1G011060			SBP	PF03110	SBP domain	7.1e-32	109.3	PGSC0003DMP400020255	99.7	1.23e-271
Soltu.Atl_v3.10_2G015050.1	Soltu.Atl_v3.10_2G015050			SBP	PF03110	SBP domain	7.1e-32	109.3	PGSC0003DMP400020255	99.7	1.23e-271
Soltu.Atl_v3.10_3G012030.2	Soltu.Atl_v3.10_3G012030			SBP	PF03110	SBP domain	7.1e-32	109.3	PGSC0003DMP400020255	100	2.12e-272
Soltu.Atl_v3.10_4G008840.2	Soltu.Atl_v3.10_4G008840			SBP	PF03110	SBP domain	7.1e-32	109.3	PGSC0003DMP400020255	100	2.12e-272
MSTRG.14903.3	Soltu.Atl_v3.02_3G009730			Dof	PF02701	Dof domain, zinc finger	6.7e-32	109.3	PGSC0003DMP400043612	98.9	0
Soltu.Atl_v3.02_3G009730.2	Soltu.Atl_v3.02_3G009730			Dof	PF02701	Dof domain, zinc finger	6.7e-32	109.3	PGSC0003DMP400043612	98.9	0
Soltu.Atl_v3.02_2G009850.1	Soltu.Atl_v3.02_2G009850			Dof	PF02701	Dof domain, zinc finger	6.5e-32	109.3	PGSC0003DMP400043612	94	0
Soltu.Atl_v3.02_4G009320.1	Soltu.Atl_v3.02_4G009320			Dof	PF02701	Dof domain, zinc finger	6.5e-32	109.3	PGSC0003DMP400043612	96.6	0
Soltu.Atl_v3.01_2G006050.3	Soltu.Atl_v3.01_2G006050			MYB	PF00249	Myb-like DNA-binding domain	6.3e-32	109.3	PGSC0003DMP400039333	98.5	0
Soltu.Atl_v3.01_3G005410.2	Soltu.Atl_v3.01_3G005410			MYB	PF00249	Myb-like DNA-binding domain	6.3e-32	109.3	PGSC0003DMP400039333	98.7	0
Soltu.Atl_v3.01_3G005410.4	Soltu.Atl_v3.01_3G005410			MYB	PF00249	Myb-like DNA-binding domain	6.3e-32	109.3	PGSC0003DMP400039333	98.7	0
Soltu.Atl_v3.01_4G005830.2	Soltu.Atl_v3.01_4G005830			MYB	PF00249	Myb-like DNA-binding domain	6.3e-32	109.3	PGSC0003DMP400039333	98.2	0
Soltu.Atl_v3.08_0G004500.2	Soltu.Atl_v3.08_0G004500			B3	PF02362	B3 DNA binding domain	6.2e-32	109.3	PGSC0003DMP400016861	72.6	7.23e-209
Soltu.Atl_v3.02_2G028530.1	Soltu.Atl_v3.02_2G028530			HSF	PF00447	HSF-type DNA-binding	9.3e-32	109.4	PGSC0003DMP400007176	98.7	5.31e-208
Soltu.Atl_v3.09_0G011770.2	Soltu.Atl_v3.09_0G011770			HSF	PF00447	HSF-type DNA-binding	9e-32	109.4	PGSC0003DMP400033605	96.5	1.29e-254
Soltu.Atl_v3.09_0G011860.2	Soltu.Atl_v3.09_0G011860			HSF	PF00447	HSF-type DNA-binding	9e-32	109.4	PGSC0003DMP400033605	96.5	1.29e-254
Soltu.Atl_v3.09_0G011950.1	Soltu.Atl_v3.09_0G011950			HSF	PF00447	HSF-type DNA-binding	9e-32	109.4	PGSC0003DMP400033605	96.5	1.29e-254
Soltu.Atl_v3.02_1G008500.1	Soltu.Atl_v3.02_1G008500			Dof	PF02701	Dof domain, zinc finger	6.4e-32	109.4	PGSC0003DMP400043612	96.4	0
Soltu.Atl_v3.05_1G023240.1	Soltu.Atl_v3.05_1G023240			Dof	PF02701	Dof domain, zinc finger	6.4e-32	109.4	PGSC0003DMP400040516	99.3	2.24e-177
Soltu.Atl_v3.05_2G023080.1	Soltu.Atl_v3.05_2G023080			Dof	PF02701	Dof domain, zinc finger	6.4e-32	109.4	PGSC0003DMP400040516	95.4	1.74e-172
Soltu.Atl_v3.05_4G022430.1	Soltu.Atl_v3.05_4G022430			Dof	PF02701	Dof domain, zinc finger	6.4e-32	109.4	PGSC0003DMP400040516	99.3	2.24e-177
Soltu.Atl_v3.04_2G000760.1	Soltu.Atl_v3.04_2G000760			MYB	PF00249	Myb-like DNA-binding domain	6.3e-32	109.4	PGSC0003DMP400005110	95.7	7.46e-228
Soltu.Atl_v3.01_2G006050.5	Soltu.Atl_v3.01_2G006050			MYB	PF00249	Myb-like DNA-binding domain	6.2e-32	109.4	PGSC0003DMP400039333	98.5	0
Soltu.Atl_v3.01_2G006050.6	Soltu.Atl_v3.01_2G006050			MYB	PF00249	Myb-like DNA-binding domain	6.2e-32	109.4	PGSC0003DMP400039333	98.5	0
Soltu.Atl_v3.01_3G005410.6	Soltu.Atl_v3.01_3G005410			MYB	PF00249	Myb-like DNA-binding domain	6.2e-32	109.4	PGSC0003DMP400039333	98.7	0
Soltu.Atl_v3.01_3G005410.8	Soltu.Atl_v3.01_3G005410			MYB	PF00249	Myb-like DNA-binding domain	6.2e-32	109.4	PGSC0003DMP400039333	98.7	0
Soltu.Atl_v3.01_4G005830.5	Soltu.Atl_v3.01_4G005830			MYB	PF00249	Myb-like DNA-binding domain	6.2e-32	109.4	PGSC0003DMP400039333	98.2	0
Soltu.Atl_v3.01_4G005830.7	Soltu.Atl_v3.01_4G005830			MYB	PF00249	Myb-like DNA-binding domain	6.2e-32	109.4	PGSC0003DMP400039333	98.2	0
Soltu.Atl_v3.07_1G011120.1	Soltu.Atl_v3.07_1G011120			MYB	PF00249	Myb-like DNA-binding domain	6.1e-32	109.4	PGSC0003DMP400050448	100	0
Soltu.Atl_v3.07_2G010740.1	Soltu.Atl_v3.07_2G010740			MYB	PF00249	Myb-like DNA-binding domain	6.1e-32	109.4	PGSC0003DMP400050448	99.2	0
Soltu.Atl_v3.07_3G014080.1	Soltu.Atl_v3.07_3G014080			MYB	PF00249	Myb-like DNA-binding domain	6e-32	109.4	PGSC0003DMP400050448	98.3	0
Soltu.Atl_v3.07_4G015110.1	Soltu.Atl_v3.07_4G015110			MYB	PF00249	Myb-like DNA-binding domain	6e-32	109.4	PGSC0003DMP400050448	97.9	0
MSTRG.23962.2	Soltu.Atl_v3.03_3G019220			HSF	PF00447	HSF-type DNA-binding	8.9e-32	109.5	PGSC0003DMP400025228	76.9	1.11e-166
MSTRG.23962.3	Soltu.Atl_v3.03_3G019220			HSF	PF00447	HSF-type DNA-binding	8.9e-32	109.5	PGSC0003DMP400025228	76.9	1.11e-166
Soltu.Atl_v3.03_3G019220.1	Soltu.Atl_v3.03_3G019220			HSF	PF00447	HSF-type DNA-binding	8.9e-32	109.5	PGSC0003DMP400025228	76.9	1.11e-166
Soltu.Atl_v3.09_1G007830.3	Soltu.Atl_v3.09_1G007830			HSF	PF00447	HSF-type DNA-binding	8.9e-32	109.5	PGSC0003DMP400033605	99.5	2.46e-265
Soltu.Atl_v3.09_4G015040.3	Soltu.Atl_v3.09_4G015040			HSF	PF00447	HSF-type DNA-binding	8.9e-32	109.5	PGSC0003DMP400033605	99.5	2.46e-265
Soltu.Atl_v3.02_4G014060.1	Soltu.Atl_v3.02_4G014060			Dof	PF02701	Dof domain, zinc finger	5.6e-32	109.5	PGSC0003DMP400059133	97.6	7.62e-117
Soltu.Atl_v3.09_0G011770.1	Soltu.Atl_v3.09_0G011770			HSF	PF00447	HSF-type DNA-binding	8e-32	109.6	PGSC0003DMP400033605	96.5	3.21e-255
Soltu.Atl_v3.09_0G011770.5	Soltu.Atl_v3.09_0G011770			HSF	PF00447	HSF-type DNA-binding	8e-32	109.6	PGSC0003DMP400033605	96.5	3.21e-255
Soltu.Atl_v3.09_0G011860.1	Soltu.Atl_v3.09_0G011860			HSF	PF00447	HSF-type DNA-binding	8e-32	109.6	PGSC0003DMP400033605	96.5	3.21e-255
Soltu.Atl_v3.09_0G011860.5	Soltu.Atl_v3.09_0G011860			HSF	PF00447	HSF-type DNA-binding	8e-32	109.6	PGSC0003DMP400033605	96.5	3.21e-255
Soltu.Atl_v3.09_0G011950.4	Soltu.Atl_v3.09_0G011950			HSF	PF00447	HSF-type DNA-binding	8e-32	109.6	PGSC0003DMP400033605	96.5	3.21e-255
Soltu.Atl_v3.09_4G015050.4	Soltu.Atl_v3.09_4G015050			HSF	PF00447	HSF-type DNA-binding	8e-32	109.6	PGSC0003DMP400033608	100	8.07e-261
Soltu.Atl_v3.09_1G007830.2	Soltu.Atl_v3.09_1G007830			HSF	PF00447	HSF-type DNA-binding	7.9e-32	109.6	PGSC0003DMP400033605	99.5	6.1e-266
Soltu.Atl_v3.09_1G007830.5	Soltu.Atl_v3.09_1G007830			HSF	PF00447	HSF-type DNA-binding	7.9e-32	109.6	PGSC0003DMP400033605	99.5	6.1e-266
Soltu.Atl_v3.09_4G015040.2	Soltu.Atl_v3.09_4G015040			HSF	PF00447	HSF-type DNA-binding	7.9e-32	109.6	PGSC0003DMP400033605	99.5	6.1e-266
Soltu.Atl_v3.09_4G015040.5	Soltu.Atl_v3.09_4G015040			HSF	PF00447	HSF-type DNA-binding	7.9e-32	109.6	PGSC0003DMP400033605	99.5	6.1e-266
Soltu.Atl_v3.01_0G013330.1	Soltu.Atl_v3.01_0G013330			ARF	PF06507	Auxin response factor	6.1e-32	109.6	PGSC0003DMP400000262	100	0
Soltu.Atl_v3.01_1G022860.1	Soltu.Atl_v3.01_1G022860			ARF	PF06507	Auxin response factor	6.1e-32	109.6	PGSC0003DMP400000262	99.9	0
Soltu.Atl_v3.01_3G021860.1	Soltu.Atl_v3.01_3G021860			ARF	PF06507	Auxin response factor	6.1e-32	109.6	PGSC0003DMP400000262	99.4	0
MSTRG.2429.2	Soltu.Atl_v3.01_1G022860			ARF	PF06507	Auxin response factor	6e-32	109.6	PGSC0003DMP400000262	99.9	0
MSTRG.635.2	Soltu.Atl_v3.01_0G013330			ARF	PF06507	Auxin response factor	6e-32	109.6	PGSC0003DMP400000262	100	0
MSTRG.2429.1	Soltu.Atl_v3.01_1G022860			ARF	PF06507	Auxin response factor	5.9e-32	109.6	PGSC0003DMP400000262	99.9	0
MSTRG.4448.1	Soltu.Atl_v3.01_2G027740			ARF	PF06507	Auxin response factor	5.9e-32	109.6	PGSC0003DMP400000262	99.3	0
MSTRG.635.1	Soltu.Atl_v3.01_0G013330			ARF	PF06507	Auxin response factor	5.9e-32	109.6	PGSC0003DMP400000262	100	0
MSTRG.6387.1	Soltu.Atl_v3.01_3G021860			ARF	PF06507	Auxin response factor	5.8e-32	109.6	PGSC0003DMP400000262	99.4	0
MSTRG.6387.3	Soltu.Atl_v3.01_3G021860			ARF	PF06507	Auxin response factor	5.8e-32	109.6	PGSC0003DMP400000262	99	0
Soltu.Atl_v3.01_2G015750.1	Soltu.Atl_v3.01_2G015750			MYB	PF00249	Myb-like DNA-binding domain	5.4e-32	109.6	PGSC0003DMP400015397	98.3	2.42e-205
Soltu.Atl_v3.02_3G009730.1	Soltu.Atl_v3.02_3G009730			Dof	PF02701	Dof domain, zinc finger	5.4e-32	109.6	PGSC0003DMP400043612	98.8	1.13e-302
MSTRG.65001.2	Soltu.Atl_v3.10_0G010240			MYB	PF00249	Myb-like DNA-binding domain	5.3e-32	109.6	Solyc10g086260.1.1	84.4	2.15e-163
Soltu.Atl_v3.06_1G013970.2	Soltu.Atl_v3.06_1G013970			E2F/DP	PF02319	E2F/DP family winged-helix DNA-binding domain	4.9e-32	109.6	PGSC0003DMP400010520	96	2.58e-283
Soltu.Atl_v3.06_1G013970.3	Soltu.Atl_v3.06_1G013970			E2F/DP	PF02319	E2F/DP family winged-helix DNA-binding domain	4.9e-32	109.6	PGSC0003DMP400010520	96	2.58e-283
Soltu.Atl_v3.06_1G013970.4	Soltu.Atl_v3.06_1G013970			E2F/DP	PF02319	E2F/DP family winged-helix DNA-binding domain	4.9e-32	109.6	PGSC0003DMP400010520	96	2.58e-283
Soltu.Atl_v3.09_0G011770.3	Soltu.Atl_v3.09_0G011770			HSF	PF00447	HSF-type DNA-binding	7.7e-32	109.7	PGSC0003DMP400033605	96.5	2.24e-255
Soltu.Atl_v3.09_0G011860.3	Soltu.Atl_v3.09_0G011860			HSF	PF00447	HSF-type DNA-binding	7.7e-32	109.7	PGSC0003DMP400033605	96.5	2.24e-255
Soltu.Atl_v3.09_0G011950.2	Soltu.Atl_v3.09_0G011950			HSF	PF00447	HSF-type DNA-binding	7.7e-32	109.7	PGSC0003DMP400033605	96.5	2.24e-255
Soltu.Atl_v3.09_0G011780.1	Soltu.Atl_v3.09_0G011780			HSF	PF00447	HSF-type DNA-binding	7.5e-32	109.7	PGSC0003DMP400033608	99.4	1.13e-261
Soltu.Atl_v3.09_0G011870.1	Soltu.Atl_v3.09_0G011870			HSF	PF00447	HSF-type DNA-binding	7.5e-32	109.7	PGSC0003DMP400033608	99.4	1.13e-261
Soltu.Atl_v3.09_0G011960.1	Soltu.Atl_v3.09_0G011960			HSF	PF00447	HSF-type DNA-binding	7.5e-32	109.7	PGSC0003DMP400033608	99.4	1.13e-261
Soltu.Atl_v3.09_1G007830.1	Soltu.Atl_v3.09_1G007830			HSF	PF00447	HSF-type DNA-binding	7.5e-32	109.7	PGSC0003DMP400033605	99.5	4.24e-266
Soltu.Atl_v3.09_1G007830.4	Soltu.Atl_v3.09_1G007830			HSF	PF00447	HSF-type DNA-binding	7.5e-32	109.7	PGSC0003DMP400033605	99.5	4.24e-266
Soltu.Atl_v3.09_1G007840.1	Soltu.Atl_v3.09_1G007840			HSF	PF00447	HSF-type DNA-binding	7.5e-32	109.7	PGSC0003DMP400033608	99.7	6.81e-263
Soltu.Atl_v3.09_4G015040.1	Soltu.Atl_v3.09_4G015040			HSF	PF00447	HSF-type DNA-binding	7.5e-32	109.7	PGSC0003DMP400033605	99.5	4.24e-266
Soltu.Atl_v3.09_4G015040.4	Soltu.Atl_v3.09_4G015040			HSF	PF00447	HSF-type DNA-binding	7.5e-32	109.7	PGSC0003DMP400033605	99.5	4.24e-266
Soltu.Atl_v3.09_4G015050.2	Soltu.Atl_v3.09_4G015050			HSF	PF00447	HSF-type DNA-binding	7.5e-32	109.7	PGSC0003DMP400033608	99.7	6.81e-263
MSTRG.58759.14	Soltu.Atl_v3.09_0G011860			HSF	PF00447	HSF-type DNA-binding	7.4e-32	109.7	PGSC0003DMP400033605	99.7	1.27e-265
MSTRG.58759.16	Soltu.Atl_v3.09_0G011860			HSF	PF00447	HSF-type DNA-binding	7.4e-32	109.7	PGSC0003DMP400033605	99.7	7.33e-267
Soltu.Atl_v3.11_1G013270.1	Soltu.Atl_v3.11_1G013270			HSF	PF00447	HSF-type DNA-binding	7.3e-32	109.7	PGSC0003DMP400056532	100	9.32e-183
Soltu.Atl_v3.11_2G009200.1	Soltu.Atl_v3.11_2G009200			HSF	PF00447	HSF-type DNA-binding	7.3e-32	109.7	PGSC0003DMP400056532	98	1.22e-178
Soltu.Atl_v3.11_4G014710.1	Soltu.Atl_v3.11_4G014710			HSF	PF00447	HSF-type DNA-binding	7.3e-32	109.7	PGSC0003DMP400056532	99.6	1.55e-181
MSTRG.59509.18	Soltu.Atl_v3.09_1G007840			HSF	PF00447	HSF-type DNA-binding	7.2e-32	109.7	PGSC0003DMP400033608	100	1.93e-262
MSTRG.59509.21	Soltu.Atl_v3.09_1G007840			HSF	PF00447	HSF-type DNA-binding	7.2e-32	109.7	PGSC0003DMP400033608	100	1.93e-262
Soltu.Atl_v3.06_4G002760.1	Soltu.Atl_v3.06_4G002760			LBD (AS2/LOB)	PF03195	Protein of unknown function DUF260	6.9e-32	109.7	PGSC0003DMP400052995	92.6	9e-40
Soltu.Atl_v3.03_1G024800.1	Soltu.Atl_v3.03_1G024800			SBP	PF03110	SBP domain	5.6e-32	109.7	PGSC0003DMP400042430	95.8	0
Soltu.Atl_v3.03_1G024800.2	Soltu.Atl_v3.03_1G024800			SBP	PF03110	SBP domain	5.6e-32	109.7	PGSC0003DMP400042430	95.8	0
Soltu.Atl_v3.03_1G024800.3	Soltu.Atl_v3.03_1G024800			SBP	PF03110	SBP domain	5.6e-32	109.7	PGSC0003DMP400042430	95.8	0
Soltu.Atl_v3.03_4G021340.1	Soltu.Atl_v3.03_4G021340			SBP	PF03110	SBP domain	5.6e-32	109.7	PGSC0003DMP400042430	95.8	0
Soltu.Atl_v3.03_4G021340.2	Soltu.Atl_v3.03_4G021340			SBP	PF03110	SBP domain	5.6e-32	109.7	PGSC0003DMP400042430	95.8	0
Soltu.Atl_v3.03_4G021340.3	Soltu.Atl_v3.03_4G021340			SBP	PF03110	SBP domain	5.6e-32	109.7	PGSC0003DMP400042430	95.8	0
Soltu.Atl_v3.01_2G027740.1	Soltu.Atl_v3.01_2G027740			ARF	PF06507	Auxin response factor	5.4e-32	109.7	PGSC0003DMP400000262	99.1	0
Soltu.Atl_v3.03_3G030610.1	Soltu.Atl_v3.03_3G030610			SBP	PF03110	SBP domain	5.4e-32	109.7	PGSC0003DMP400042430	93.4	0
Soltu.Atl_v3.03_3G030610.2	Soltu.Atl_v3.03_3G030610			SBP	PF03110	SBP domain	5.4e-32	109.7	PGSC0003DMP400042430	93.4	0
Soltu.Atl_v3.03_3G030610.3	Soltu.Atl_v3.03_3G030610			SBP	PF03110	SBP domain	5.4e-32	109.7	PGSC0003DMP400042430	93.4	0
Soltu.Atl_v3.05_3G023200.1	Soltu.Atl_v3.05_3G023200			Dof	PF02701	Dof domain, zinc finger	5e-32	109.7	PGSC0003DMP400040516	89.4	1.68e-156
Soltu.Atl_v3.06_0G008550.1	Soltu.Atl_v3.06_0G008550			MYB	PF00249	Myb-like DNA-binding domain	5e-32	109.7	PGSC0003DMP400028466	97.8	1.77e-187
Soltu.Atl_v3.06_0G010070.1	Soltu.Atl_v3.06_0G010070			MYB	PF00249	Myb-like DNA-binding domain	5e-32	109.7	PGSC0003DMP400028466	97.8	1.77e-187
Soltu.Atl_v3.10_1G009600.2	Soltu.Atl_v3.10_1G009600			MYB	PF00249	Myb-like DNA-binding domain	5e-32	109.7	PGSC0003DMP400048854	99.6	1.35e-173
Soltu.Atl_v3.10_2G013120.2	Soltu.Atl_v3.10_2G013120			MYB	PF00249	Myb-like DNA-binding domain	5e-32	109.7	PGSC0003DMP400048854	99.6	1.35e-173
Soltu.Atl_v3.10_4G006720.2	Soltu.Atl_v3.10_4G006720			MYB	PF00249	Myb-like DNA-binding domain	5e-32	109.7	PGSC0003DMP400048854	99.6	1.35e-173
Soltu.Atl_v3.10_4G006740.2	Soltu.Atl_v3.10_4G006740			MYB	PF00249	Myb-like DNA-binding domain	5e-32	109.7	PGSC0003DMP400048854	99.6	1.35e-173
Soltu.Atl_v3.06_4G009100.1	Soltu.Atl_v3.06_4G009100			MYB	PF00249	Myb-like DNA-binding domain	4.9e-32	109.7	PGSC0003DMP400028466	99.6	9.52e-194
Soltu.Atl_v3.08_0G004490.1	Soltu.Atl_v3.08_0G004490			B3	PF02362	B3 DNA binding domain	4.9e-32	109.7	Sopen08g002180.1	88.8	4.24e-162
Soltu.Atl_v3.10_0G015970.1	Soltu.Atl_v3.10_0G015970			MYB	PF00249	Myb-like DNA-binding domain	4.8e-32	109.7	PGSC0003DMP400048867	98.5	4.92e-200
MSTRG.58759.1	Soltu.Atl_v3.09_0G011770			HSF	PF00447	HSF-type DNA-binding	7.1e-32	109.8	PGSC0003DMP400033610	94.9	3.36e-239
MSTRG.58759.18	Soltu.Atl_v3.09_0G011860			HSF	PF00447	HSF-type DNA-binding	7.1e-32	109.8	PGSC0003DMP400033605	96.2	1.49e-238
Soltu.Atl_v3.09_0G011770.4	Soltu.Atl_v3.09_0G011770			HSF	PF00447	HSF-type DNA-binding	7.1e-32	109.8	PGSC0003DMP400033605	96.2	1.49e-238
Soltu.Atl_v3.09_0G011770.6	Soltu.Atl_v3.09_0G011770			HSF	PF00447	HSF-type DNA-binding	7.1e-32	109.8	PGSC0003DMP400033605	96.2	1.49e-238
Soltu.Atl_v3.09_0G011860.4	Soltu.Atl_v3.09_0G011860			HSF	PF00447	HSF-type DNA-binding	7.1e-32	109.8	PGSC0003DMP400033605	96.2	1.49e-238
Soltu.Atl_v3.09_0G011860.6	Soltu.Atl_v3.09_0G011860			HSF	PF00447	HSF-type DNA-binding	7.1e-32	109.8	PGSC0003DMP400033605	96.2	1.49e-238
Soltu.Atl_v3.09_0G011950.3	Soltu.Atl_v3.09_0G011950			HSF	PF00447	HSF-type DNA-binding	7.1e-32	109.8	PGSC0003DMP400033605	96.2	1.49e-238
Soltu.Atl_v3.09_0G011950.5	Soltu.Atl_v3.09_0G011950			HSF	PF00447	HSF-type DNA-binding	7.1e-32	109.8	PGSC0003DMP400033605	96.2	1.49e-238
Soltu.Atl_v3.08_3G016430.1	Soltu.Atl_v3.08_3G016430			HSF	PF00447	HSF-type DNA-binding	7e-32	109.8	PGSC0003DMP400005485	100	4.44e-203
Soltu.Atl_v3.08_4G020150.1	Soltu.Atl_v3.08_4G020150			HSF	PF00447	HSF-type DNA-binding	7e-32	109.8	PGSC0003DMP400005485	100	4.44e-203
MSTRG.63765.4	Soltu.Atl_v3.09_4G015040			HSF	PF00447	HSF-type DNA-binding	6.8e-32	109.8	PGSC0003DMP400033605	98.8	1.45e-244
MSTRG.6387.2	Soltu.Atl_v3.01_3G021860			ARF	PF06507	Auxin response factor	5.2e-32	109.8	PGSC0003DMP400000262	99.7	0
Soltu.Atl_v3.05_1G004220.1	Soltu.Atl_v3.05_1G004220			MYB	PF00249	Myb-like DNA-binding domain	4.7e-32	109.8	PGSC0003DMP400032103	95.3	1.82e-214
Soltu.Atl_v3.07_2G012030.3	Soltu.Atl_v3.07_2G012030			B3	PF02362	B3 DNA binding domain	4.7e-32	109.8	PGSC0003DMP400032011	90	1.47e-286
Soltu.Atl_v3.10_1G009430.1	Soltu.Atl_v3.10_1G009430			MYB	PF00249	Myb-like DNA-binding domain	4.7e-32	109.8	PGSC0003DMP400048867	88.6	2.97e-176
Soltu.Atl_v3.10_2G012960.1	Soltu.Atl_v3.10_2G012960			MYB	PF00249	Myb-like DNA-binding domain	4.7e-32	109.8	PGSC0003DMP400048867	88.6	2.97e-176
Soltu.Atl_v3.10_4G006550.1	Soltu.Atl_v3.10_4G006550			MYB	PF00249	Myb-like DNA-binding domain	4.7e-32	109.8	PGSC0003DMP400048867	88.6	2.97e-176
Soltu.Atl_v3.07_4G016660.2	Soltu.Atl_v3.07_4G016660			B3	PF02362	B3 DNA binding domain	4.6e-32	109.8	PGSC0003DMP400032011	97.1	4.4e-257
Soltu.Atl_v3.05_2G004750.3	Soltu.Atl_v3.05_2G004750			MYB	PF00249	Myb-like DNA-binding domain	4.5e-32	109.8	PGSC0003DMP400032103	100	2.67e-236
Soltu.Atl_v3.09_3G022670.1	Soltu.Atl_v3.09_3G022670			MYB	PF00249	Myb-like DNA-binding domain	4.4e-32	109.8	PGSC0003DMP400002707	90.2	2.12e-151
MSTRG.59509.19	Soltu.Atl_v3.09_1G007840			HSF	PF00447	HSF-type DNA-binding	6.7e-32	109.9	PGSC0003DMP400033610	100	1.06e-254
MSTRG.59509.20	Soltu.Atl_v3.09_1G007840			HSF	PF00447	HSF-type DNA-binding	6.7e-32	109.9	PGSC0003DMP400033610	100	1.06e-254
Soltu.Atl_v3.09_0G011780.2	Soltu.Atl_v3.09_0G011780			HSF	PF00447	HSF-type DNA-binding	6.7e-32	109.9	PGSC0003DMP400033610	99.7	1.76e-253
Soltu.Atl_v3.09_0G011870.2	Soltu.Atl_v3.09_0G011870			HSF	PF00447	HSF-type DNA-binding	6.7e-32	109.9	PGSC0003DMP400033610	99.7	1.76e-253
Soltu.Atl_v3.09_0G011960.2	Soltu.Atl_v3.09_0G011960			HSF	PF00447	HSF-type DNA-binding	6.7e-32	109.9	PGSC0003DMP400033610	99.7	1.76e-253
Soltu.Atl_v3.09_1G007840.2	Soltu.Atl_v3.09_1G007840			HSF	PF00447	HSF-type DNA-binding	6.7e-32	109.9	PGSC0003DMP400033610	100	1.06e-254
Soltu.Atl_v3.09_1G007840.3	Soltu.Atl_v3.09_1G007840			HSF	PF00447	HSF-type DNA-binding	6.7e-32	109.9	PGSC0003DMP400033610	100	1.06e-254
Soltu.Atl_v3.09_4G015050.1	Soltu.Atl_v3.09_4G015050			HSF	PF00447	HSF-type DNA-binding	6.7e-32	109.9	PGSC0003DMP400033610	100	1.06e-254
Soltu.Atl_v3.09_4G015050.3	Soltu.Atl_v3.09_4G015050			HSF	PF00447	HSF-type DNA-binding	6.7e-32	109.9	PGSC0003DMP400033610	100	1.06e-254
Soltu.Atl_v3.09_3G022070.1	Soltu.Atl_v3.09_3G022070			MYB	PF00249	Myb-like DNA-binding domain	4.4e-32	109.9	PGSC0003DMP400002707	92.1	3.03e-153
Soltu.Atl_v3.06_2G025560.4	Soltu.Atl_v3.06_2G025560			MYB	PF00249	Myb-like DNA-binding domain	4.3e-32	109.9	PGSC0003DMP400010497	99	0
Soltu.Atl_v3.09_4G021190.1	Soltu.Atl_v3.09_4G021190			MYB	PF00249	Myb-like DNA-binding domain	4.3e-32	109.9	PGSC0003DMP400002707	90.5	3.8e-151
Soltu.Atl_v3.07_4G016240.1	Soltu.Atl_v3.07_4G016240			MYB	PF00249	Myb-like DNA-binding domain	4.2e-32	109.9	PGSC0003DMP400045418	80.5	3.33e-132
Soltu.Atl_v3.10_0G016160.1	Soltu.Atl_v3.10_0G016160			MYB	PF00249	Myb-like DNA-binding domain	4.1e-32	109.9	PGSC0003DMP400048854	95.6	1.87e-203
MSTRG.19951.1	Soltu.Atl_v3.03_1G014770			HSF	PF00447	HSF-type DNA-binding	6.2e-32	110	PGSC0003DMP400025228	80.7	1.19e-174
MSTRG.19951.2	Soltu.Atl_v3.03_1G014770			HSF	PF00447	HSF-type DNA-binding	6.2e-32	110	PGSC0003DMP400025228	80.7	1.19e-174
Soltu.Atl_v3.03_1G014770.1	Soltu.Atl_v3.03_1G014770			HSF	PF00447	HSF-type DNA-binding	6.2e-32	110	PGSC0003DMP400025228	80.7	1.19e-174
Soltu.Atl_v3.06_2G025560.1	Soltu.Atl_v3.06_2G025560			MYB	PF00249	Myb-like DNA-binding domain	4e-32	110	PGSC0003DMP400010497	99	0
Soltu.Atl_v3.06_3G019250.2	Soltu.Atl_v3.06_3G019250			MYB	PF00249	Myb-like DNA-binding domain	4e-32	110	PGSC0003DMP400010497	99.4	0
Soltu.Atl_v3.06_3G019480.2	Soltu.Atl_v3.06_3G019480			MYB	PF00249	Myb-like DNA-binding domain	4e-32	110	PGSC0003DMP400010497	99.4	0
Soltu.Atl_v3.04_4G000740.1	Soltu.Atl_v3.04_4G000740			MYB	PF00249	Myb-like DNA-binding domain	3.9e-32	110	PGSC0003DMP400005110	97.2	1.06e-231
Soltu.Atl_v3.05_1G021810.2	Soltu.Atl_v3.05_1G021810			MYB	PF00249	Myb-like DNA-binding domain	3.9e-32	110	PGSC0003DMP400047194	97	4.2e-231
Soltu.Atl_v3.05_1G023400.2	Soltu.Atl_v3.05_1G023400			MYB	PF00249	Myb-like DNA-binding domain	3.9e-32	110	PGSC0003DMP400047194	97.3	6.22e-233
Soltu.Atl_v3.05_3G021990.2	Soltu.Atl_v3.05_3G021990			MYB	PF00249	Myb-like DNA-binding domain	3.9e-32	110	PGSC0003DMP400047194	97	4.2e-231
Soltu.Atl_v3.05_2G021340.2	Soltu.Atl_v3.05_2G021340			MYB	PF00249	Myb-like DNA-binding domain	3.8e-32	110	PGSC0003DMP400047194	95.4	3.87e-231
Soltu.Atl_v3.09_2G019230.8	Soltu.Atl_v3.09_2G019230			Nin-like	PF02042	RWP-RK domain	3.6e-32	110	PGSC0003DMP400051646	83.8	2.88e-241
Soltu.Atl_v3.09_3G023420.8	Soltu.Atl_v3.09_3G023420			Nin-like	PF02042	RWP-RK domain	3.6e-32	110	PGSC0003DMP400051646	83.8	2.35e-241
Soltu.Atl_v3.05_2G005300.4	Soltu.Atl_v3.05_2G005300			TCP	PF03634	TCP family transcription factor	1.4e-31	110.1	PGSC0003DMP400006051	92	2.09e-93
MSTRG.75479.1	Soltu.Atl_v3.12_1G007730			ARF	PF06507	Auxin response factor	4e-32	110.1	PGSC0003DMP400050217	98.2	0
MSTRG.75479.2	Soltu.Atl_v3.12_1G007730			ARF	PF06507	Auxin response factor	4e-32	110.1	PGSC0003DMP400050216	98.2	0
Soltu.Atl_v3.06_3G019250.1	Soltu.Atl_v3.06_3G019250			MYB	PF00249	Myb-like DNA-binding domain	3.8e-32	110.1	PGSC0003DMP400010497	99.4	0
Soltu.Atl_v3.06_3G019480.1	Soltu.Atl_v3.06_3G019480			MYB	PF00249	Myb-like DNA-binding domain	3.8e-32	110.1	PGSC0003DMP400010497	99.4	0
Soltu.Atl_v3.07_3G015070.1	Soltu.Atl_v3.07_3G015070			MYB	PF00249	Myb-like DNA-binding domain	3.8e-32	110.1	PGSC0003DMP400045418	83.1	1.1e-137
Soltu.Atl_v3.07_4G016200.1	Soltu.Atl_v3.07_4G016200			MYB	PF00249	Myb-like DNA-binding domain	3.8e-32	110.1	PGSC0003DMP400045418	80.9	1.42e-133
Soltu.Atl_v3.06_4G016230.1	Soltu.Atl_v3.06_4G016230			MYB	PF00249	Myb-like DNA-binding domain	3.7e-32	110.1	PGSC0003DMP400058999	97.6	1.3e-306
Soltu.Atl_v3.07_3G015050.1	Soltu.Atl_v3.07_3G015050			MYB	PF00249	Myb-like DNA-binding domain	3.7e-32	110.1	PGSC0003DMP400045419	96.3	2.27e-160
Soltu.Atl_v3.10_0G010020.1	Soltu.Atl_v3.10_0G010020			Dof	PF02701	Dof domain, zinc finger	3.7e-32	110.1	PGSC0003DMP400033281	96.5	5.29e-203
Soltu.Atl_v3.03_3G000750.1	Soltu.Atl_v3.03_3G000750			MYB	PF00249	Myb-like DNA-binding domain	3.6e-32	110.1	PGSC0003DMP400023726	93.3	6.1e-173
Soltu.Atl_v3.02_3G011420.1	Soltu.Atl_v3.02_3G011420			TCP	PF03634	TCP family transcription factor	1.2e-31	110.2	PGSC0003DMP400062336	100	4.24e-182
Soltu.Atl_v3.08_2G018830.1	Soltu.Atl_v3.08_2G018830			HSF	PF00447	HSF-type DNA-binding	5.3e-32	110.2	PGSC0003DMP400005485	98.7	7.03e-200
Soltu.Atl_v3.12_3G021380.1	Soltu.Atl_v3.12_3G021380			ARF	PF06507	Auxin response factor	3.9e-32	110.2	PGSC0003DMP400050216	98	0
Soltu.Atl_v3.12_3G021380.2	Soltu.Atl_v3.12_3G021380			ARF	PF06507	Auxin response factor	3.9e-32	110.2	PGSC0003DMP400050217	98	0
Soltu.Atl_v3.12_4G010800.1	Soltu.Atl_v3.12_4G010800			ARF	PF06507	Auxin response factor	3.9e-32	110.2	PGSC0003DMP400050217	100	0
Soltu.Atl_v3.12_4G010800.2	Soltu.Atl_v3.12_4G010800			ARF	PF06507	Auxin response factor	3.9e-32	110.2	PGSC0003DMP400050216	100	0
Soltu.Atl_v3.10_2G008190.1	Soltu.Atl_v3.10_2G008190			Dof	PF02701	Dof domain, zinc finger	3.6e-32	110.2	PGSC0003DMP400033281	97.6	1.59e-204
Soltu.Atl_v3.10_4G005120.1	Soltu.Atl_v3.10_4G005120			Dof	PF02701	Dof domain, zinc finger	3.6e-32	110.2	PGSC0003DMP400033281	99.5	2.28e-206
Soltu.Atl_v3.03_4G000620.1	Soltu.Atl_v3.03_4G000620			MYB	PF00249	Myb-like DNA-binding domain	3.5e-32	110.2	PGSC0003DMP400023726	92.9	2.04e-171
Soltu.Atl_v3.08_3G003050.1	Soltu.Atl_v3.08_3G003050			MYB	PF00249	Myb-like DNA-binding domain	3.4e-32	110.2	PGSC0003DMP400010367	62.2	1.01e-128
Soltu.Atl_v3.08_4G001390.1	Soltu.Atl_v3.08_4G001390			MYB	PF00249	Myb-like DNA-binding domain	3.4e-32	110.2	PGSC0003DMP400010367	61.6	4.74e-127
MSTRG.77143.3	Soltu.Atl_v3.12_2G022650			ARF	PF06507	Auxin response factor	3.7e-32	110.3	PGSC0003DMP400050217	97.6	0
MSTRG.78621.3	Soltu.Atl_v3.12_3G021380			ARF	PF06507	Auxin response factor	3.6e-32	110.3	PGSC0003DMP400050217	92	0
Soltu.Atl_v3.06_2G025560.2	Soltu.Atl_v3.06_2G025560			MYB	PF00249	Myb-like DNA-binding domain	3.2e-32	110.3	PGSC0003DMP400010496	99.1	0
Soltu.Atl_v3.06_3G019250.3	Soltu.Atl_v3.06_3G019250			MYB	PF00249	Myb-like DNA-binding domain	3.2e-32	110.3	PGSC0003DMP400010496	99.6	0
Soltu.Atl_v3.06_4G019060.2	Soltu.Atl_v3.06_4G019060			MYB	PF00249	Myb-like DNA-binding domain	3.2e-32	110.3	PGSC0003DMP400010496	98.9	0
Soltu.Atl_v3.06_4G019060.3	Soltu.Atl_v3.06_4G019060			MYB	PF00249	Myb-like DNA-binding domain	3.2e-32	110.3	PGSC0003DMP400010496	98.9	0
Soltu.Atl_v3.01_3G001200.1	Soltu.Atl_v3.01_3G001200			MYB	PF00249	Myb-like DNA-binding domain	3.1e-32	110.3	Sopen01g001670.1	88.8	3.46e-185
Soltu.Atl_v3.06_2G027550.2	Soltu.Atl_v3.06_2G027550			MYB	PF00249	Myb-like DNA-binding domain	3.1e-32	110.3	PGSC0003DMP400052906	99.4	1.99e-117
Soltu.Atl_v3.06_3G021260.2	Soltu.Atl_v3.06_3G021260			MYB	PF00249	Myb-like DNA-binding domain	3.1e-32	110.3	PGSC0003DMP400052906	99.4	1.99e-117
Soltu.Atl_v3.09_2G019230.2	Soltu.Atl_v3.09_2G019230			Nin-like	PF02042	RWP-RK domain	2.7e-32	110.3	PGSC0003DMP400051646	84.6	4.19e-265
Soltu.Atl_v3.09_3G023420.2	Soltu.Atl_v3.09_3G023420			Nin-like	PF02042	RWP-RK domain	2.7e-32	110.3	PGSC0003DMP400051646	84.6	4.19e-265
Soltu.Atl_v3.12_2G003390.1	Soltu.Atl_v3.12_2G003390			HSF	PF00447	HSF-type DNA-binding	4.4e-32	110.4	PGSC0003DMP400008251	96	0
Soltu.Atl_v3.06_4G019060.1	Soltu.Atl_v3.06_4G019060			MYB	PF00249	Myb-like DNA-binding domain	3e-32	110.4	PGSC0003DMP400010496	98.9	0
Soltu.Atl_v3.10_0G016160.2	Soltu.Atl_v3.10_0G016160			MYB	PF00249	Myb-like DNA-binding domain	3e-32	110.4	PGSC0003DMP400048854	96.2	2.32e-164
MSTRG.66914.1	Soltu.Atl_v3.10_2G008600			MYB	PF00249	Myb-like DNA-binding domain	2.9e-32	110.4	Sopen10g035660.1	93.5	4.62e-174
Soltu.Atl_v3.09_2G019230.1	Soltu.Atl_v3.09_2G019230			Nin-like	PF02042	RWP-RK domain	2.7e-32	110.4	PGSC0003DMP400051646	84.6	3.39e-265
Soltu.Atl_v3.09_3G023420.1	Soltu.Atl_v3.09_3G023420			Nin-like	PF02042	RWP-RK domain	2.7e-32	110.4	PGSC0003DMP400051646	84.6	3.39e-265
Soltu.Atl_v3.02_2G015960.1	Soltu.Atl_v3.02_2G015960			Dof	PF02701	Dof domain, zinc finger	2.9e-32	110.5	PGSC0003DMP400059133	97.6	5.43e-118
Soltu.Atl_v3.02_1G012950.1	Soltu.Atl_v3.02_1G012950			Dof	PF02701	Dof domain, zinc finger	2.8e-32	110.5	PGSC0003DMP400059133	100	6.08e-121
Soltu.Atl_v3.02_3G016520.1	Soltu.Atl_v3.02_3G016520			Dof	PF02701	Dof domain, zinc finger	2.8e-32	110.5	PGSC0003DMP400059133	99.4	1.01e-119
Soltu.Atl_v3.02_4G014020.1	Soltu.Atl_v3.02_4G014020			Dof	PF02701	Dof domain, zinc finger	2.8e-32	110.5	PGSC0003DMP400059133	100	6.08e-121
MSTRG.25657.2	Soltu.Atl_v3.03_4G010130			HSF	PF00447	HSF-type DNA-binding	4e-32	110.6	PGSC0003DMP400025228	78.2	2.02e-169
MSTRG.25657.3	Soltu.Atl_v3.03_4G010130			HSF	PF00447	HSF-type DNA-binding	4e-32	110.6	PGSC0003DMP400025228	78.2	2.02e-169
Soltu.Atl_v3.03_4G010130.1	Soltu.Atl_v3.03_4G010130			HSF	PF00447	HSF-type DNA-binding	4e-32	110.6	PGSC0003DMP400025228	78.2	2.02e-169
Soltu.Atl_v3.05_1G004210.2	Soltu.Atl_v3.05_1G004210			Dof	PF02701	Dof domain, zinc finger	2.7e-32	110.6	PGSC0003DMP400032069	100	0
Soltu.Atl_v3.05_2G004740.2	Soltu.Atl_v3.05_2G004740			Dof	PF02701	Dof domain, zinc finger	2.7e-32	110.6	PGSC0003DMP400032069	100	0
Soltu.Atl_v3.06_0G014430.1	Soltu.Atl_v3.06_0G014430			MYB	PF00249	Myb-like DNA-binding domain	2.6e-32	110.6	PGSC0003DMP400052906	98.8	1.34e-115
Soltu.Atl_v3.06_0G014520.1	Soltu.Atl_v3.06_0G014520			MYB	PF00249	Myb-like DNA-binding domain	2.6e-32	110.6	PGSC0003DMP400052906	96.5	2.99e-110
Soltu.Atl_v3.06_1G015410.1	Soltu.Atl_v3.06_1G015410			MYB	PF00249	Myb-like DNA-binding domain	2.6e-32	110.6	PGSC0003DMP400052906	96.5	2.99e-110
Soltu.Atl_v3.06_4G020930.1	Soltu.Atl_v3.06_4G020930			MYB	PF00249	Myb-like DNA-binding domain	2.6e-32	110.6	PGSC0003DMP400052906	98.8	1.34e-115
Soltu.Atl_v3.07_2G012030.2	Soltu.Atl_v3.07_2G012030			B3	PF02362	B3 DNA binding domain	2.6e-32	110.6	PGSC0003DMP400032011	96.5	7.85e-256
MSTRG.66911.2	Soltu.Atl_v3.10_2G008440			MYB	PF00249	Myb-like DNA-binding domain	2.5e-32	110.6	Solyc10g086250.1.1	71.7	1.57e-88
Soltu.Atl_v3.06_2G023000.1	Soltu.Atl_v3.06_2G023000			MYB	PF00249	Myb-like DNA-binding domain	2.5e-32	110.6	PGSC0003DMP400058999	96	7.74e-301
Soltu.Atl_v3.06_3G016940.1	Soltu.Atl_v3.06_3G016940			MYB	PF00249	Myb-like DNA-binding domain	2.5e-32	110.6	PGSC0003DMP400058999	96	7.74e-301
Soltu.Atl_v3.S141630.1	Soltu.Atl_v3.S141630			MYB	PF00249	Myb-like DNA-binding domain	2.5e-32	110.6	PGSC0003DMP400058999	96	7.74e-301
Soltu.Atl_v3.07_0G009050.1	Soltu.Atl_v3.07_0G009050			TCP	PF03634	TCP family transcription factor	9e-32	110.7	PGSC0003DMP400016628	95.5	1.15e-206
Soltu.Atl_v3.02_2G017160.4	Soltu.Atl_v3.02_2G017160			SBP	PF03110	SBP domain	2.5e-32	110.7	PGSC0003DMP400051752	97.8	1.87e-92
Soltu.Atl_v3.05_2G004740.4	Soltu.Atl_v3.05_2G004740			Dof	PF02701	Dof domain, zinc finger	2.5e-32	110.7	PGSC0003DMP400032069	100	4.61e-288
Soltu.Atl_v3.06_1G011780.1	Soltu.Atl_v3.06_1G011780			MYB	PF00249	Myb-like DNA-binding domain	2.4e-32	110.7	PGSC0003DMP400058999	100	4.5999999999327E-314
Soltu.Atl_v3.08_2G001430.1	Soltu.Atl_v3.08_2G001430			Dof	PF02701	Dof domain, zinc finger	2.4e-32	110.7	PGSC0003DMP400010277	99.2	3.44e-165
Soltu.Atl_v3.08_4G001410.1	Soltu.Atl_v3.08_4G001410			Dof	PF02701	Dof domain, zinc finger	2.4e-32	110.7	PGSC0003DMP400010277	99.2	3.44e-165
Soltu.Atl_v3.09_0G001860.1	Soltu.Atl_v3.09_0G001860			Dof	PF02701	Dof domain, zinc finger	2.4e-32	110.7	PGSC0003DMP400015688	94.2	2.43e-203
Soltu.Atl_v3.09_0G003220.1	Soltu.Atl_v3.09_0G003220			Dof	PF02701	Dof domain, zinc finger	2.4e-32	110.7	PGSC0003DMP400015688	93.4	1.76e-207
MSTRG.5793.2	Soltu.Atl_v3.01_3G013240			MYB	PF00249	Myb-like DNA-binding domain	2.3e-32	110.7	PGSC0003DMP400015397	100	8.89e-208
Soltu.Atl_v3.03_1G004990.1	Soltu.Atl_v3.03_1G004990			EIL	PF04873	Ethylene insensitive 3	6e-32	110.8	PGSC0003DMP400035837	62.7	2.22e-52
MSTRG.68125.2	Soltu.Atl_v3.10_3G012030			SBP	PF03110	SBP domain	2.4e-32	110.8	PGSC0003DMP400020254	100	2.7e-34
Soltu.Atl_v3.05_0G001860.2	Soltu.Atl_v3.05_0G001860			Dof	PF02701	Dof domain, zinc finger	2.3e-32	110.8	PGSC0003DMP400032069	100	1.51e-288
Soltu.Atl_v3.05_4G004910.2	Soltu.Atl_v3.05_4G004910			Dof	PF02701	Dof domain, zinc finger	2.3e-32	110.8	PGSC0003DMP400032069	100	1.51e-288
Soltu.Atl_v3.08_0G003530.3	Soltu.Atl_v3.08_0G003530			B3	PF02362	B3 DNA binding domain	2.3e-32	110.8	PGSC0003DMP400016861	98.5	5.75e-194
Soltu.Atl_v3.08_0G003530.4	Soltu.Atl_v3.08_0G003530			B3	PF02362	B3 DNA binding domain	2.3e-32	110.8	PGSC0003DMP400016861	98.5	5.75e-194
Soltu.Atl_v3.08_0G003530.6	Soltu.Atl_v3.08_0G003530			B3	PF02362	B3 DNA binding domain	2.3e-32	110.8	PGSC0003DMP400016861	98.5	5.75e-194
Soltu.Atl_v3.08_0G003530.8	Soltu.Atl_v3.08_0G003530			B3	PF02362	B3 DNA binding domain	2.3e-32	110.8	PGSC0003DMP400016861	98.5	5.75e-194
Soltu.Atl_v3.09_3G000420.1	Soltu.Atl_v3.09_3G000420			Dof	PF02701	Dof domain, zinc finger	2.3e-32	110.8	PGSC0003DMP400015688	93.1	1.94e-204
Soltu.Atl_v3.05_1G004220.3	Soltu.Atl_v3.05_1G004220			MYB	PF00249	Myb-like DNA-binding domain	2.2e-32	110.8	PGSC0003DMP400032103	98.6	1.38e-153
Soltu.Atl_v3.07_4G016250.1	Soltu.Atl_v3.07_4G016250			MYB	PF00249	Myb-like DNA-binding domain	2.2e-32	110.8	Solyc07g054960.1.1	91.1	2.82e-116
Soltu.Atl_v3.09_2G019230.4	Soltu.Atl_v3.09_2G019230			Nin-like	PF02042	RWP-RK domain	1.9e-32	110.8	PGSC0003DMP400051646	84.6	5.99e-267
Soltu.Atl_v3.09_2G019230.5	Soltu.Atl_v3.09_2G019230			Nin-like	PF02042	RWP-RK domain	1.9e-32	110.8	PGSC0003DMP400051646	84.6	5.99e-267
Soltu.Atl_v3.09_3G023420.4	Soltu.Atl_v3.09_3G023420			Nin-like	PF02042	RWP-RK domain	1.9e-32	110.8	PGSC0003DMP400051646	84.6	5.99e-267
Soltu.Atl_v3.09_3G023420.5	Soltu.Atl_v3.09_3G023420			Nin-like	PF02042	RWP-RK domain	1.9e-32	110.8	PGSC0003DMP400051646	84.6	5.99e-267
Soltu.Atl_v3.07_4G017800.1	Soltu.Atl_v3.07_4G017800			TCP	PF03634	TCP family transcription factor	7.8e-32	110.9	PGSC0003DMP400016628	95.5	1.15e-206
Soltu.Atl_v3.07_2G012920.1	Soltu.Atl_v3.07_2G012920			TCP	PF03634	TCP family transcription factor	7.3e-32	110.9	PGSC0003DMP400016628	97.1	1.2e-208
Soltu.Atl_v3.10_3G008910.4	Soltu.Atl_v3.10_3G008910			WRKY	PF03106	WRKY DNA -binding domain	2.4e-32	110.9	PGSC0003DMP400019407	98.8	3.97e-292
Soltu.Atl_v3.02_1G003740.1	Soltu.Atl_v3.02_1G003740			ARF	PF06507	Auxin response factor	2.3e-32	110.9	PGSC0003DMP400032529	72.4	0
Soltu.Atl_v3.12_1G007730.1	Soltu.Atl_v3.12_1G007730			ARF	PF06507	Auxin response factor	2.3e-32	110.9	PGSC0003DMP400050217	97.5	0
Soltu.Atl_v3.12_1G007730.2	Soltu.Atl_v3.12_1G007730			ARF	PF06507	Auxin response factor	2.3e-32	110.9	PGSC0003DMP400050216	97.5	0
Soltu.Atl_v3.12_2G022650.1	Soltu.Atl_v3.12_2G022650			ARF	PF06507	Auxin response factor	2.3e-32	110.9	PGSC0003DMP400050216	97.9	0
Soltu.Atl_v3.12_2G022650.2	Soltu.Atl_v3.12_2G022650			ARF	PF06507	Auxin response factor	2.3e-32	110.9	PGSC0003DMP400050217	97.9	0
Soltu.Atl_v3.07_1G013150.1	Soltu.Atl_v3.07_1G013150			SBP	PF03110	SBP domain	2.1e-32	111	PGSC0003DMP400055718	93.9	2.16e-67
Soltu.Atl_v3.05_1G004210.1	Soltu.Atl_v3.05_1G004210			Dof	PF02701	Dof domain, zinc finger	2e-32	111	PGSC0003DMP400032070	100	5.37e-269
Soltu.Atl_v3.05_2G004740.1	Soltu.Atl_v3.05_2G004740			Dof	PF02701	Dof domain, zinc finger	2e-32	111	PGSC0003DMP400032070	100	5.37e-269
Soltu.Atl_v3.05_2G004740.3	Soltu.Atl_v3.05_2G004740			Dof	PF02701	Dof domain, zinc finger	2e-32	111	PGSC0003DMP400032070	100	5.37e-269
Soltu.Atl_v3.07_0G015280.1	Soltu.Atl_v3.07_0G015280			MYB	PF00249	Myb-like DNA-binding domain	2e-32	111	PGSC0003DMP400061017	95.9	3.31e-170
Soltu.Atl_v3.07_1G002590.1	Soltu.Atl_v3.07_1G002590			MYB	PF00249	Myb-like DNA-binding domain	2e-32	111	PGSC0003DMP400053853	100	8.86e-159
Soltu.Atl_v3.07_4G001680.1	Soltu.Atl_v3.07_4G001680			MYB	PF00249	Myb-like DNA-binding domain	2e-32	111	PGSC0003DMP400053853	100	8.86e-159
Soltu.Atl_v3.07_4G001680.2	Soltu.Atl_v3.07_4G001680			MYB	PF00249	Myb-like DNA-binding domain	2e-32	111	PGSC0003DMP400053853	100	8.86e-159
MSTRG.52852.6	Soltu.Atl_v3.08_0G003450			B3	PF02362	B3 DNA binding domain	1.9e-32	111	Sme2.5_01183.1_g00006.1	83.1	2.87e-174
Soltu.Atl_v3.10_0G013780.7	Soltu.Atl_v3.10_0G013780			WRKY	PF03106	WRKY DNA -binding domain	2.1e-32	111.1	PGSC0003DMP400019407	93.8	1.19e-277
MSTRG.13179.2	Soltu.Atl_v3.02_2G016790			ARF	PF06507	Auxin response factor	2e-32	111.1	PGSC0003DMP400054999	98.4	0
MSTRG.13179.3	Soltu.Atl_v3.02_2G016790			ARF	PF06507	Auxin response factor	2e-32	111.1	PGSC0003DMP400054998	98.4	0
Soltu.Atl_v3.06_2G028060.2	Soltu.Atl_v3.06_2G028060			Dof	PF02701	Dof domain, zinc finger	1.9e-32	111.1	PGSC0003DMP400052918	89.8	3.4e-205
Soltu.Atl_v3.06_2G028060.4	Soltu.Atl_v3.06_2G028060			Dof	PF02701	Dof domain, zinc finger	1.9e-32	111.1	PGSC0003DMP400052918	89.8	3.4e-205
Soltu.Atl_v3.06_3G021770.2	Soltu.Atl_v3.06_3G021770			Dof	PF02701	Dof domain, zinc finger	1.9e-32	111.1	PGSC0003DMP400052918	89.8	3.4e-205
Soltu.Atl_v3.06_3G021770.4	Soltu.Atl_v3.06_3G021770			Dof	PF02701	Dof domain, zinc finger	1.9e-32	111.1	PGSC0003DMP400052918	89.8	3.4e-205
Soltu.Atl_v3.09_0G001860.2	Soltu.Atl_v3.09_0G001860			Dof	PF02701	Dof domain, zinc finger	1.9e-32	111.1	PGSC0003DMP400015688	93.6	1.68e-177
Soltu.Atl_v3.09_0G003220.2	Soltu.Atl_v3.09_0G003220			Dof	PF02701	Dof domain, zinc finger	1.9e-32	111.1	PGSC0003DMP400015688	92.4	7.82e-180
Soltu.Atl_v3.06_4G021400.1	Soltu.Atl_v3.06_4G021400			Dof	PF02701	Dof domain, zinc finger	1.8e-32	111.1	PGSC0003DMP400052918	91.3	7.75e-211
Soltu.Atl_v3.09_3G000420.2	Soltu.Atl_v3.09_3G000420			Dof	PF02701	Dof domain, zinc finger	1.8e-32	111.1	PGSC0003DMP400015688	92.3	1.34e-178
Soltu.Atl_v3.04_3G000550.1	Soltu.Atl_v3.04_3G000550			MYB	PF00249	Myb-like DNA-binding domain	1.7e-32	111.1	PGSC0003DMP400005110	98.5	3.31e-233
Soltu.Atl_v3.02_3G010950.1	Soltu.Atl_v3.02_3G010950			TCP	PF03634	TCP family transcription factor	6.3e-32	111.2	PGSC0003DMP400062336	100	4.24e-182
Soltu.Atl_v3.02_1G003740.2	Soltu.Atl_v3.02_1G003740			ARF	PF06507	Auxin response factor	1.9e-32	111.2	PGSC0003DMP400032529	68.2	4.79e-250
Soltu.Atl_v3.02_1G003740.3	Soltu.Atl_v3.02_1G003740			ARF	PF06507	Auxin response factor	1.9e-32	111.2	PGSC0003DMP400032529	68.3	3.51e-250
Soltu.Atl_v3.02_1G014300.2	Soltu.Atl_v3.02_1G014300			SBP	PF03110	SBP domain	1.8e-32	111.2	PGSC0003DMP400051752	97.8	1.05e-91
Soltu.Atl_v3.07_2G002490.1	Soltu.Atl_v3.07_2G002490			MYB	PF00249	Myb-like DNA-binding domain	1.7e-32	111.2	PGSC0003DMP400053853	100	5.43e-153
Soltu.Atl_v3.07_3G002910.1	Soltu.Atl_v3.07_3G002910			MYB	PF00249	Myb-like DNA-binding domain	1.7e-32	111.2	PGSC0003DMP400053853	100	5.43e-153
Soltu.Atl_v3.01_1G011870.1	Soltu.Atl_v3.01_1G011870			MYB	PF00249	Myb-like DNA-binding domain	1.6e-32	111.2	PGSC0003DMP400015397	100	1.08e-209
Soltu.Atl_v3.10_4G005440.1	Soltu.Atl_v3.10_4G005440			MYB	PF00249	Myb-like DNA-binding domain	1.6e-32	111.2	Sme2.5_05099.1_g00002.1	60.5	3.91e-94
Soltu.Atl_v3.02_4G026130.1	Soltu.Atl_v3.02_4G026130			TCP	PF03634	TCP family transcription factor	5.6e-32	111.3	PGSC0003DMP400035189	99.6	6.33e-156
Soltu.Atl_v3.07_1G013950.1	Soltu.Atl_v3.07_1G013950			TCP	PF03634	TCP family transcription factor	5.6e-32	111.3	PGSC0003DMP400016628	93.3	1.18e-203
Soltu.Atl_v3.04_4G018980.1	Soltu.Atl_v3.04_4G018980			HSF	PF00447	HSF-type DNA-binding	2.3e-32	111.3	PGSC0003DMP400014004	92.7	1.16e-247
Soltu.Atl_v3.02_2G016790.1	Soltu.Atl_v3.02_2G016790			ARF	PF06507	Auxin response factor	1.8e-32	111.3	PGSC0003DMP400054999	98.4	0
Soltu.Atl_v3.02_2G016790.2	Soltu.Atl_v3.02_2G016790			ARF	PF06507	Auxin response factor	1.8e-32	111.3	PGSC0003DMP400054998	98.4	0
Soltu.Atl_v3.07_3G016240.1	Soltu.Atl_v3.07_3G016240			SBP	PF03110	SBP domain	1.7e-32	111.3	PGSC0003DMP400055718	100	6.16e-73
MSTRG.20735.1	Soltu.Atl_v3.03_1G025910			Dof	PF02701	Dof domain, zinc finger	1.6e-32	111.3	PGSC0003DMP400033936	97.8	0
MSTRG.81161.1	Soltu.Atl_v3.S153910			Dof	PF02701	Dof domain, zinc finger	1.6e-32	111.3	PGSC0003DMP400033936	97.8	0
Soltu.Atl_v3.01_3G013240.1	Soltu.Atl_v3.01_3G013240			MYB	PF00249	Myb-like DNA-binding domain	1.6e-32	111.3	PGSC0003DMP400015397	100	2.97e-209
Soltu.Atl_v3.01_4G003150.1	Soltu.Atl_v3.01_4G003150			B3	PF02362	B3 DNA binding domain	1.6e-32	111.3	PGSC0003DMP400065826	57.9	5.33e-103
Soltu.Atl_v3.02_1G014320.1	Soltu.Atl_v3.02_1G014320			Dof	PF02701	Dof domain, zinc finger	1.6e-32	111.3	PGSC0003DMP400051750	85	1.89e-118
Soltu.Atl_v3.03_1G025910.1	Soltu.Atl_v3.03_1G025910			Dof	PF02701	Dof domain, zinc finger	1.6e-32	111.3	PGSC0003DMP400033936	97.8	0
Soltu.Atl_v3.03_3G031760.1	Soltu.Atl_v3.03_3G031760			Dof	PF02701	Dof domain, zinc finger	1.6e-32	111.3	PGSC0003DMP400033936	97.2	0
Soltu.Atl_v3.05_0G001860.1	Soltu.Atl_v3.05_0G001860			Dof	PF02701	Dof domain, zinc finger	1.6e-32	111.3	PGSC0003DMP400032070	100	1.9e-229
Soltu.Atl_v3.05_4G004910.1	Soltu.Atl_v3.05_4G004910			Dof	PF02701	Dof domain, zinc finger	1.6e-32	111.3	PGSC0003DMP400032070	100	1.9e-229
Soltu.Atl_v3.06_2G026080.1	Soltu.Atl_v3.06_2G026080			B3	PF02362	B3 DNA binding domain	1.6e-32	111.3	PGSC0003DMP400010438	99.6	2.16e-166
Soltu.Atl_v3.S153910.1	Soltu.Atl_v3.S153910			Dof	PF02701	Dof domain, zinc finger	1.6e-32	111.3	PGSC0003DMP400033936	97.8	0
Soltu.Atl_v3.02_3G017830.1	Soltu.Atl_v3.02_3G017830			Dof	PF02701	Dof domain, zinc finger	1.5e-32	111.3	PGSC0003DMP400051750	86.3	4.36e-123
Soltu.Atl_v3.02_3G021720.1	Soltu.Atl_v3.02_3G021720			MYB	PF00249	Myb-like DNA-binding domain	1.5e-32	111.3	PGSC0003DMP400021429	98.5	2.63e-198
Soltu.Atl_v3.06_2G028060.3	Soltu.Atl_v3.06_2G028060			Dof	PF02701	Dof domain, zinc finger	1.5e-32	111.3	PGSC0003DMP400052918	79.7	5.71e-174
Soltu.Atl_v3.06_3G021770.3	Soltu.Atl_v3.06_3G021770			Dof	PF02701	Dof domain, zinc finger	1.5e-32	111.3	PGSC0003DMP400052918	79.7	5.71e-174
Soltu.Atl_v3.09_1G011810.1	Soltu.Atl_v3.09_1G011810			MYB	PF00249	Myb-like DNA-binding domain	1.5e-32	111.3	PGSC0003DMP400030100	99.3	2.85e-195
Soltu.Atl_v3.08_4G016270.1	Soltu.Atl_v3.08_4G016270			HSF	PF00447	HSF-type DNA-binding	2.2e-32	111.4	PGSC0003DMP400026069	95.8	0
Soltu.Atl_v3.11_3G014750.1	Soltu.Atl_v3.11_3G014750			HSF	PF00447	HSF-type DNA-binding	2.2e-32	111.4	PGSC0003DMP400056532	96.7	7.29e-175
Soltu.Atl_v3.02_1G014300.1	Soltu.Atl_v3.02_1G014300			SBP	PF03110	SBP domain	1.6e-32	111.4	PGSC0003DMP400051752	97.8	1.08e-91
Soltu.Atl_v3.07_0G008610.1	Soltu.Atl_v3.07_0G008610			SBP	PF03110	SBP domain	1.6e-32	111.4	PGSC0003DMP400055718	98.2	8e-71
Soltu.Atl_v3.07_4G017370.1	Soltu.Atl_v3.07_4G017370			SBP	PF03110	SBP domain	1.6e-32	111.4	PGSC0003DMP400055718	98.2	8e-71
Soltu.Atl_v3.03_2G023670.1	Soltu.Atl_v3.03_2G023670			Dof	PF02701	Dof domain, zinc finger	1.5e-32	111.4	PGSC0003DMP400033936	96.2	0
Soltu.Atl_v3.04_1G000750.1	Soltu.Atl_v3.04_1G000750			MYB	PF00249	Myb-like DNA-binding domain	1.5e-32	111.4	PGSC0003DMP400005110	95.4	7.06e-226
Soltu.Atl_v3.06_2G028060.1	Soltu.Atl_v3.06_2G028060			Dof	PF02701	Dof domain, zinc finger	1.5e-32	111.4	PGSC0003DMP400052918	88.3	1.26e-158
Soltu.Atl_v3.06_3G021770.1	Soltu.Atl_v3.06_3G021770			Dof	PF02701	Dof domain, zinc finger	1.5e-32	111.4	PGSC0003DMP400052918	88.3	1.26e-158
Soltu.Atl_v3.02_1G019210.1	Soltu.Atl_v3.02_1G019210			MYB	PF00249	Myb-like DNA-binding domain	1.4e-32	111.4	PGSC0003DMP400012972	97.8	8.16e-237
Soltu.Atl_v3.02_2G021650.1	Soltu.Atl_v3.02_2G021650			MYB	PF00249	Myb-like DNA-binding domain	1.4e-32	111.4	PGSC0003DMP400012972	95.1	3.86e-229
Soltu.Atl_v3.03_4G010550.1	Soltu.Atl_v3.03_4G010550			MYB	PF00249	Myb-like DNA-binding domain	1.4e-32	111.4	PGSC0003DMP400025180	98.2	2.18e-206
Soltu.Atl_v3.04_0G010160.1	Soltu.Atl_v3.04_0G010160			Dof	PF02701	Dof domain, zinc finger	1.4e-32	111.4	PGSC0003DMP400001503	98.5	2.51e-190
Soltu.Atl_v3.02_4G026130.2	Soltu.Atl_v3.02_4G026130			TCP	PF03634	TCP family transcription factor	5e-32	111.5	PGSC0003DMP400035189	99.6	6.33e-156
Soltu.Atl_v3.02_1G031540.2	Soltu.Atl_v3.02_1G031540			TCP	PF03634	TCP family transcription factor	4.9e-32	111.5	PGSC0003DMP400035189	97.8	1.08e-149
Soltu.Atl_v3.02_2G034850.1	Soltu.Atl_v3.02_2G034850			TCP	PF03634	TCP family transcription factor	4.9e-32	111.5	PGSC0003DMP400035189	98.7	4.98e-153
Soltu.Atl_v3.04_1G018370.1	Soltu.Atl_v3.04_1G018370			HSF	PF00447	HSF-type DNA-binding	2.1e-32	111.5	PGSC0003DMP400014004	95.5	1.15e-241
Soltu.Atl_v3.04_2G016890.1	Soltu.Atl_v3.04_2G016890			HSF	PF00447	HSF-type DNA-binding	2.1e-32	111.5	PGSC0003DMP400014004	100	4.32e-256
Soltu.Atl_v3.04_3G018410.1	Soltu.Atl_v3.04_3G018410			HSF	PF00447	HSF-type DNA-binding	2.1e-32	111.5	PGSC0003DMP400014004	100	4.32e-256
Soltu.Atl_v3.11_3G018140.6	Soltu.Atl_v3.11_3G018140			ARF	PF06507	Auxin response factor	1.5e-32	111.5	PGSC0003DMP400014218	97.7	0
Soltu.Atl_v3.05_1G000650.1	Soltu.Atl_v3.05_1G000650			SBP	PF03110	SBP domain	1.4e-32	111.5	PGSC0003DMP400049211	98.2	0
Soltu.Atl_v3.05_1G000650.2	Soltu.Atl_v3.05_1G000650			SBP	PF03110	SBP domain	1.4e-32	111.5	PGSC0003DMP400049211	98.2	0
Soltu.Atl_v3.05_1G000650.3	Soltu.Atl_v3.05_1G000650			SBP	PF03110	SBP domain	1.4e-32	111.5	PGSC0003DMP400049211	98.2	0
Soltu.Atl_v3.05_1G000650.4	Soltu.Atl_v3.05_1G000650			SBP	PF03110	SBP domain	1.4e-32	111.5	PGSC0003DMP400049211	98.2	0
Soltu.Atl_v3.05_1G000650.5	Soltu.Atl_v3.05_1G000650			SBP	PF03110	SBP domain	1.4e-32	111.5	PGSC0003DMP400049211	98.2	0
Soltu.Atl_v3.05_1G000650.6	Soltu.Atl_v3.05_1G000650			SBP	PF03110	SBP domain	1.4e-32	111.5	PGSC0003DMP400049211	98.2	0
Soltu.Atl_v3.05_1G000650.7	Soltu.Atl_v3.05_1G000650			SBP	PF03110	SBP domain	1.4e-32	111.5	PGSC0003DMP400049211	98.2	0
Soltu.Atl_v3.02_4G017680.1	Soltu.Atl_v3.02_4G017680			MYB	PF00249	Myb-like DNA-binding domain	1.3e-32	111.5	PGSC0003DMP400012972	97.2	6.43e-234
Soltu.Atl_v3.03_1G015150.1	Soltu.Atl_v3.03_1G015150			MYB	PF00249	Myb-like DNA-binding domain	1.3e-32	111.5	PGSC0003DMP400025180	98.9	4.09e-209
Soltu.Atl_v3.03_2G013280.1	Soltu.Atl_v3.03_2G013280			MYB	PF00249	Myb-like DNA-binding domain	1.3e-32	111.5	PGSC0003DMP400025180	98.9	4.09e-209
Soltu.Atl_v3.03_3G019600.1	Soltu.Atl_v3.03_3G019600			MYB	PF00249	Myb-like DNA-binding domain	1.3e-32	111.5	PGSC0003DMP400025180	98.2	1.79e-205
Soltu.Atl_v3.07_1G012110.1	Soltu.Atl_v3.07_1G012110			MYB	PF00249	Myb-like DNA-binding domain	1.3e-32	111.5	PGSC0003DMP400045419	97.2	1.36e-157
Soltu.Atl_v3.07_4G016180.1	Soltu.Atl_v3.07_4G016180			MYB	PF00249	Myb-like DNA-binding domain	1.3e-32	111.5	PGSC0003DMP400045419	96.8	4.75e-158
Soltu.Atl_v3.S109480.1	Soltu.Atl_v3.S109480			MYB	PF00249	Myb-like DNA-binding domain	1.3e-32	111.5	PGSC0003DMP400045419	97.2	1.36e-157
Soltu.Atl_v3.09_2G019220.1	Soltu.Atl_v3.09_2G019220			Nin-like	PF02042	RWP-RK domain	1.2e-32	111.5	PGSC0003DMP400051646	91.1	6.38e-289
Soltu.Atl_v3.09_2G019220.10	Soltu.Atl_v3.09_2G019220			Nin-like	PF02042	RWP-RK domain	1.2e-32	111.5	PGSC0003DMP400051646	90.6	6.64e-287
Soltu.Atl_v3.09_2G019220.14	Soltu.Atl_v3.09_2G019220			Nin-like	PF02042	RWP-RK domain	1.2e-32	111.5	PGSC0003DMP400051646	91.1	5.74e-289
Soltu.Atl_v3.09_3G023410.1	Soltu.Atl_v3.09_3G023410			Nin-like	PF02042	RWP-RK domain	1.2e-32	111.5	PGSC0003DMP400051646	91.1	6.38e-289
Soltu.Atl_v3.09_3G023410.10	Soltu.Atl_v3.09_3G023410			Nin-like	PF02042	RWP-RK domain	1.2e-32	111.5	PGSC0003DMP400051646	90.6	7.37e-287
Soltu.Atl_v3.09_3G023410.14	Soltu.Atl_v3.09_3G023410			Nin-like	PF02042	RWP-RK domain	1.2e-32	111.5	PGSC0003DMP400051646	91.1	5.74e-289
Soltu.Atl_v3.08_3G013370.1	Soltu.Atl_v3.08_3G013370			HSF	PF00447	HSF-type DNA-binding	1.9e-32	111.6	PGSC0003DMP400026069	95	0
Soltu.Atl_v3.08_3G013370.4	Soltu.Atl_v3.08_3G013370			HSF	PF00447	HSF-type DNA-binding	1.9e-32	111.6	PGSC0003DMP400026069	95	0
Soltu.Atl_v3.05_2G000610.1	Soltu.Atl_v3.05_2G000610			SBP	PF03110	SBP domain	1.4e-32	111.6	PGSC0003DMP400049211	97.8	0
Soltu.Atl_v3.05_2G000610.2	Soltu.Atl_v3.05_2G000610			SBP	PF03110	SBP domain	1.4e-32	111.6	PGSC0003DMP400049211	97.8	0
Soltu.Atl_v3.05_2G000610.3	Soltu.Atl_v3.05_2G000610			SBP	PF03110	SBP domain	1.4e-32	111.6	PGSC0003DMP400049211	97.8	0
Soltu.Atl_v3.05_2G000610.4	Soltu.Atl_v3.05_2G000610			SBP	PF03110	SBP domain	1.4e-32	111.6	PGSC0003DMP400049211	97.8	0
Soltu.Atl_v3.05_2G000610.5	Soltu.Atl_v3.05_2G000610			SBP	PF03110	SBP domain	1.4e-32	111.6	PGSC0003DMP400049211	97.8	0
Soltu.Atl_v3.05_2G000610.6	Soltu.Atl_v3.05_2G000610			SBP	PF03110	SBP domain	1.4e-32	111.6	PGSC0003DMP400049211	97.8	0
Soltu.Atl_v3.05_2G000610.7	Soltu.Atl_v3.05_2G000610			SBP	PF03110	SBP domain	1.4e-32	111.6	PGSC0003DMP400049211	97.8	0
Soltu.Atl_v3.05_3G000980.1	Soltu.Atl_v3.05_3G000980			SBP	PF03110	SBP domain	1.4e-32	111.6	PGSC0003DMP400049211	97.7	0
Soltu.Atl_v3.05_3G000980.2	Soltu.Atl_v3.05_3G000980			SBP	PF03110	SBP domain	1.4e-32	111.6	PGSC0003DMP400049211	97.7	0
Soltu.Atl_v3.05_3G000980.3	Soltu.Atl_v3.05_3G000980			SBP	PF03110	SBP domain	1.4e-32	111.6	PGSC0003DMP400049211	97.7	0
Soltu.Atl_v3.05_3G000980.4	Soltu.Atl_v3.05_3G000980			SBP	PF03110	SBP domain	1.4e-32	111.6	PGSC0003DMP400049211	97.7	0
Soltu.Atl_v3.05_3G000980.5	Soltu.Atl_v3.05_3G000980			SBP	PF03110	SBP domain	1.4e-32	111.6	PGSC0003DMP400049211	97.7	0
Soltu.Atl_v3.05_3G000980.6	Soltu.Atl_v3.05_3G000980			SBP	PF03110	SBP domain	1.4e-32	111.6	PGSC0003DMP400049211	97.7	0
Soltu.Atl_v3.05_4G001010.1	Soltu.Atl_v3.05_4G001010			SBP	PF03110	SBP domain	1.4e-32	111.6	PGSC0003DMP400049211	98.4	0
Soltu.Atl_v3.05_4G001010.2	Soltu.Atl_v3.05_4G001010			SBP	PF03110	SBP domain	1.4e-32	111.6	PGSC0003DMP400049211	98.4	0
Soltu.Atl_v3.05_4G001010.3	Soltu.Atl_v3.05_4G001010			SBP	PF03110	SBP domain	1.4e-32	111.6	PGSC0003DMP400049211	98.4	0
Soltu.Atl_v3.05_4G001010.4	Soltu.Atl_v3.05_4G001010			SBP	PF03110	SBP domain	1.4e-32	111.6	PGSC0003DMP400049211	98.4	0
Soltu.Atl_v3.05_4G001010.5	Soltu.Atl_v3.05_4G001010			SBP	PF03110	SBP domain	1.4e-32	111.6	PGSC0003DMP400049211	98.4	0
Soltu.Atl_v3.05_4G001010.6	Soltu.Atl_v3.05_4G001010			SBP	PF03110	SBP domain	1.4e-32	111.6	PGSC0003DMP400049211	98.4	0
Soltu.Atl_v3.05_4G001010.7	Soltu.Atl_v3.05_4G001010			SBP	PF03110	SBP domain	1.4e-32	111.6	PGSC0003DMP400049211	98.4	0
Soltu.Atl_v3.05_4G001010.8	Soltu.Atl_v3.05_4G001010			SBP	PF03110	SBP domain	1.4e-32	111.6	PGSC0003DMP400049211	98.4	0
Soltu.Atl_v3.11_3G018140.1	Soltu.Atl_v3.11_3G018140			ARF	PF06507	Auxin response factor	1.4e-32	111.6	PGSC0003DMP400014218	98.6	0
Soltu.Atl_v3.11_3G018140.2	Soltu.Atl_v3.11_3G018140			ARF	PF06507	Auxin response factor	1.4e-32	111.6	PGSC0003DMP400014218	98.6	0
Soltu.Atl_v3.11_3G018140.3	Soltu.Atl_v3.11_3G018140			ARF	PF06507	Auxin response factor	1.4e-32	111.6	PGSC0003DMP400014218	98.6	0
Soltu.Atl_v3.11_3G018140.4	Soltu.Atl_v3.11_3G018140			ARF	PF06507	Auxin response factor	1.4e-32	111.6	PGSC0003DMP400014218	98.6	0
Soltu.Atl_v3.11_3G018140.5	Soltu.Atl_v3.11_3G018140			ARF	PF06507	Auxin response factor	1.4e-32	111.6	PGSC0003DMP400014218	98.6	0
Soltu.Atl_v3.07_2G011730.1	Soltu.Atl_v3.07_2G011730			MYB	PF00249	Myb-like DNA-binding domain	1.3e-32	111.6	PGSC0003DMP400045419	92.2	8.14e-156
Soltu.Atl_v3.04_3G010040.1	Soltu.Atl_v3.04_3G010040			MYB	PF00249	Myb-like DNA-binding domain	1.2e-32	111.6	PGSC0003DMP400056681	94.7	2.06e-92
Soltu.Atl_v3.10_0G010260.1	Soltu.Atl_v3.10_0G010260			MYB	PF00249	Myb-like DNA-binding domain	1.2e-32	111.6	Sopen10g035660.1	60.3	3.21e-96
Soltu.Atl_v3.02_1G031540.1	Soltu.Atl_v3.02_1G031540			TCP	PF03634	TCP family transcription factor	4.3e-32	111.7	PGSC0003DMP400035189	97.8	1.08e-149
MSTRG.15017.1	Soltu.Atl_v3.02_3G011440			TCP	PF03634	TCP family transcription factor	4.2e-32	111.7	PGSC0003DMP400062336	100	4.24e-182
Soltu.Atl_v3.08_1G012520.1	Soltu.Atl_v3.08_1G012520			HSF	PF00447	HSF-type DNA-binding	1.7e-32	111.7	PGSC0003DMP400026069	95.6	0
Soltu.Atl_v3.08_1G012520.2	Soltu.Atl_v3.08_1G012520			HSF	PF00447	HSF-type DNA-binding	1.7e-32	111.7	PGSC0003DMP400026069	95.6	0
MSTRG.43295.5	Soltu.Atl_v3.06_2G028060			Dof	PF02701	Dof domain, zinc finger	1.2e-32	111.7	PGSC0003DMP400052918	77.2	1.25e-141
Soltu.Atl_v3.09_0G005540.1	Soltu.Atl_v3.09_0G005540			ARF	PF06507	Auxin response factor	1.2e-32	111.8	PGSC0003DMP400037382	99.4	0
Soltu.Atl_v3.09_0G005540.2	Soltu.Atl_v3.09_0G005540			ARF	PF06507	Auxin response factor	1.2e-32	111.8	PGSC0003DMP400037379	99.4	0
Soltu.Atl_v3.09_0G005540.3	Soltu.Atl_v3.09_0G005540			ARF	PF06507	Auxin response factor	1.2e-32	111.8	PGSC0003DMP400037382	99.4	0
Soltu.Atl_v3.09_0G005540.4	Soltu.Atl_v3.09_0G005540			ARF	PF06507	Auxin response factor	1.2e-32	111.8	PGSC0003DMP400037379	99.4	0
Soltu.Atl_v3.09_3G003950.1	Soltu.Atl_v3.09_3G003950			ARF	PF06507	Auxin response factor	1.2e-32	111.8	PGSC0003DMP400037382	99.6	0
Soltu.Atl_v3.09_3G003950.2	Soltu.Atl_v3.09_3G003950			ARF	PF06507	Auxin response factor	1.2e-32	111.8	PGSC0003DMP400037379	99.6	0
Soltu.Atl_v3.09_3G003950.3	Soltu.Atl_v3.09_3G003950			ARF	PF06507	Auxin response factor	1.2e-32	111.8	PGSC0003DMP400037382	99.6	0
Soltu.Atl_v3.09_3G003950.4	Soltu.Atl_v3.09_3G003950			ARF	PF06507	Auxin response factor	1.2e-32	111.8	PGSC0003DMP400037379	99.6	0
Soltu.Atl_v3.09_4G003670.1	Soltu.Atl_v3.09_4G003670			ARF	PF06507	Auxin response factor	1.2e-32	111.8	PGSC0003DMP400037382	99.4	0
Soltu.Atl_v3.09_4G003670.2	Soltu.Atl_v3.09_4G003670			ARF	PF06507	Auxin response factor	1.2e-32	111.8	PGSC0003DMP400037379	99.4	0
Soltu.Atl_v3.09_4G003670.3	Soltu.Atl_v3.09_4G003670			ARF	PF06507	Auxin response factor	1.2e-32	111.8	PGSC0003DMP400037382	99.4	0
Soltu.Atl_v3.09_4G003670.4	Soltu.Atl_v3.09_4G003670			ARF	PF06507	Auxin response factor	1.2e-32	111.8	PGSC0003DMP400037379	99.4	0
Soltu.Atl_v3.02_3G023120.1	Soltu.Atl_v3.02_3G023120			MYB	PF00249	Myb-like DNA-binding domain	1.1e-32	111.8	PGSC0003DMP400012972	96	3.83e-214
Soltu.Atl_v3.02_4G015080.1	Soltu.Atl_v3.02_4G015080			Dof	PF02701	Dof domain, zinc finger	1.1e-32	111.8	PGSC0003DMP400051750	84.9	2.06e-122
Soltu.Atl_v3.08_0G004210.1	Soltu.Atl_v3.08_0G004210			B3	PF02362	B3 DNA binding domain	1.1e-32	111.8	PGSC0003DMP400024049	75.5	1.14e-93
Soltu.Atl_v3.09_2G005350.1	Soltu.Atl_v3.09_2G005350			ARF	PF06507	Auxin response factor	1.2e-32	111.9	PGSC0003DMP400037382	99.7	0
Soltu.Atl_v3.09_2G005350.2	Soltu.Atl_v3.09_2G005350			ARF	PF06507	Auxin response factor	1.2e-32	111.9	PGSC0003DMP400037382	99.7	0
Soltu.Atl_v3.09_2G005350.3	Soltu.Atl_v3.09_2G005350			ARF	PF06507	Auxin response factor	1.2e-32	111.9	PGSC0003DMP400037379	99.6	0
Soltu.Atl_v3.07_1G012140.1	Soltu.Atl_v3.07_1G012140			MYB	PF00249	Myb-like DNA-binding domain	1e-32	111.9	Solyc07g054960.1.1	89.3	7.72e-114
Soltu.Atl_v3.08_0G004210.2	Soltu.Atl_v3.08_0G004210			B3	PF02362	B3 DNA binding domain	1e-32	111.9	PGSC0003DMP400024049	71.8	1.45e-85
Soltu.Atl_v3.10_1G000860.1	Soltu.Atl_v3.10_1G000860			MYB	PF00249	Myb-like DNA-binding domain	1e-32	111.9	PGSC0003DMP400015271	98.2	4.95e-244
Soltu.Atl_v3.04_2G008170.1	Soltu.Atl_v3.04_2G008170			MYB	PF00249	Myb-like DNA-binding domain	9.9e-33	111.9	PGSC0003DMP400066962	94.5	8.45e-85
Soltu.Atl_v3.04_3G009990.1	Soltu.Atl_v3.04_3G009990			MYB	PF00249	Myb-like DNA-binding domain	9.9e-33	111.9	PGSC0003DMP400066962	94.5	8.45e-85
Soltu.Atl_v3.02_1G008660.1	Soltu.Atl_v3.02_1G008660			MYB	PF00249	Myb-like DNA-binding domain	9.7e-33	111.9	PGSC0003DMP400012270	90.9	7.57e-202
Soltu.Atl_v3.07_4G016160.1	Soltu.Atl_v3.07_4G016160			MYB	PF00249	Myb-like DNA-binding domain	9.7e-33	111.9	PGSC0003DMP400045418	93.5	1.29e-169
MSTRG.63270.5	Soltu.Atl_v3.09_4G003670			ARF	PF06507	Auxin response factor	1.1e-32	112	PGSC0003DMP400037382	100	2.4e-30
Soltu.Atl_v3.06_1G014090.1	Soltu.Atl_v3.06_1G014090			B3	PF02362	B3 DNA binding domain	9.5e-33	112	PGSC0003DMP400010438	98.7	5.08e-165
Soltu.Atl_v3.07_3G020310.1	Soltu.Atl_v3.07_3G020310			SBP	PF03110	SBP domain	9.3e-33	112.1	PGSC0003DMP400056849	97	2.12e-92
Soltu.Atl_v3.04_4G008990.1	Soltu.Atl_v3.04_4G008990			MYB	PF00249	Myb-like DNA-binding domain	9e-33	112.1	PGSC0003DMP400066962	83.3	2.48e-77
Soltu.Atl_v3.01_2G001370.1	Soltu.Atl_v3.01_2G001370			MYB	PF00249	Myb-like DNA-binding domain	8.9e-33	112.1	Sopen01g001670.1	93.2	3.94e-199
Soltu.Atl_v3.01_4G001320.1	Soltu.Atl_v3.01_4G001320			MYB	PF00249	Myb-like DNA-binding domain	8.9e-33	112.1	Sopen01g001670.1	93.2	3.94e-199
Soltu.Atl_v3.07_3G022500.6	Soltu.Atl_v3.07_3G022500			WRKY	PF03106	WRKY DNA -binding domain	9.8e-33	112.2	PGSC0003DMP400038615	94.1	3.49e-277
Soltu.Atl_v3.09_2G002070.1	Soltu.Atl_v3.09_2G002070			Dof	PF02701	Dof domain, zinc finger	8.6e-33	112.2	PGSC0003DMP400015688	95.9	3.57e-215
MSTRG.60265.1	Soltu.Atl_v3.09_2G002070			Dof	PF02701	Dof domain, zinc finger	8.2e-33	112.2	PGSC0003DMP400015688	97.8	3.19e-216
MSTRG.60265.2	Soltu.Atl_v3.09_2G002070			Dof	PF02701	Dof domain, zinc finger	8.2e-33	112.2	PGSC0003DMP400015688	97.8	7.64e-219
MSTRG.60265.3	Soltu.Atl_v3.09_2G002070			Dof	PF02701	Dof domain, zinc finger	8.2e-33	112.2	PGSC0003DMP400015688	97.8	3.19e-216
MSTRG.60265.4	Soltu.Atl_v3.09_2G002070			Dof	PF02701	Dof domain, zinc finger	8.2e-33	112.2	PGSC0003DMP400015688	98.3	3.79e-219
MSTRG.60265.5	Soltu.Atl_v3.09_2G002070			Dof	PF02701	Dof domain, zinc finger	8.2e-33	112.2	PGSC0003DMP400015688	97.8	7.64e-219
Soltu.Atl_v3.10_2G000880.1	Soltu.Atl_v3.10_2G000880			MYB	PF00249	Myb-like DNA-binding domain	7.9e-33	112.2	PGSC0003DMP400015271	99.1	2.1e-245
Soltu.Atl_v3.07_3G016690.2	Soltu.Atl_v3.07_3G016690			TCP	PF03634	TCP family transcription factor	2.9e-32	112.3	PGSC0003DMP400016628	98.4	1.7e-210
Soltu.Atl_v3.07_3G016690.1	Soltu.Atl_v3.07_3G016690			TCP	PF03634	TCP family transcription factor	2.8e-32	112.3	PGSC0003DMP400016628	98.4	1.7e-210
Soltu.Atl_v3.07_0G013120.7	Soltu.Atl_v3.07_0G013120			WRKY	PF03106	WRKY DNA -binding domain	8.8e-33	112.3	PGSC0003DMP400038615	92.5	5.33e-222
Soltu.Atl_v3.07_1G012100.2	Soltu.Atl_v3.07_1G012100			MYB	PF00249	Myb-like DNA-binding domain	7.8e-33	112.3	PGSC0003DMP400045418	95.1	1.11e-172
Soltu.Atl_v3.01_1G001450.1	Soltu.Atl_v3.01_1G001450			MYB	PF00249	Myb-like DNA-binding domain	7.7e-33	112.3	Sopen01g001670.1	87.1	6.98e-185
Soltu.Atl_v3.07_2G011720.1	Soltu.Atl_v3.07_2G011720			MYB	PF00249	Myb-like DNA-binding domain	7.7e-33	112.3	PGSC0003DMP400045418	94.7	1.11e-172
Soltu.Atl_v3.05_1G021650.1	Soltu.Atl_v3.05_1G021650			MYB	PF00249	Myb-like DNA-binding domain	7.6e-33	112.3	PGSC0003DMP400047280	99.6	1.16e-170
Soltu.Atl_v3.05_3G021830.1	Soltu.Atl_v3.05_3G021830			MYB	PF00249	Myb-like DNA-binding domain	7.6e-33	112.3	PGSC0003DMP400047280	99.6	1.16e-170
Soltu.Atl_v3.07_3G015040.1	Soltu.Atl_v3.07_3G015040			MYB	PF00249	Myb-like DNA-binding domain	7.5e-33	112.3	PGSC0003DMP400045418	99.2	2.43e-180
Soltu.Atl_v3.05_2G021180.1	Soltu.Atl_v3.05_2G021180			MYB	PF00249	Myb-like DNA-binding domain	7.3e-33	112.3	PGSC0003DMP400047280	99.1	5.75e-169
Soltu.Atl_v3.S152760.1	Soltu.Atl_v3.S152760			MYB	PF00249	Myb-like DNA-binding domain	7.3e-33	112.3	PGSC0003DMP400047280	99.1	5.75e-169
Soltu.Atl_v3.09_2G019220.2	Soltu.Atl_v3.09_2G019220			Nin-like	PF02042	RWP-RK domain	6.5e-33	112.3	PGSC0003DMP400051646	88.4	1.34e-139
Soltu.Atl_v3.09_3G023410.2	Soltu.Atl_v3.09_3G023410			Nin-like	PF02042	RWP-RK domain	6.5e-33	112.3	PGSC0003DMP400051646	88.4	1.34e-139
Soltu.Atl_v3.05_2G005300.1	Soltu.Atl_v3.05_2G005300			TCP	PF03634	TCP family transcription factor	2.5e-32	112.4	PGSC0003DMP400006051	82.6	4.77e-95
Soltu.Atl_v3.05_2G005300.3	Soltu.Atl_v3.05_2G005300			TCP	PF03634	TCP family transcription factor	2.5e-32	112.4	PGSC0003DMP400006051	82.6	4.77e-95
Soltu.Atl_v3.S070590.4	Soltu.Atl_v3.S070590			WRKY	PF03106	WRKY DNA -binding domain	8.1e-33	112.4	PGSC0003DMP400029302	99.5	1.71e-255
Soltu.Atl_v3.04_2G010080.1	Soltu.Atl_v3.04_2G010080			Dof	PF02701	Dof domain, zinc finger	7.1e-33	112.4	PGSC0003DMP400001503	67.7	1.06e-117
Soltu.Atl_v3.04_3G011960.1	Soltu.Atl_v3.04_3G011960			Dof	PF02701	Dof domain, zinc finger	7.1e-33	112.4	PGSC0003DMP400001503	68	7.47e-118
Soltu.Atl_v3.06_2G015020.5	Soltu.Atl_v3.06_2G015020			WRKY	PF03106	WRKY DNA -binding domain	8e-33	112.5	PGSC0003DMP400029302	99.2	1.89e-252
Soltu.Atl_v3.07_3G015150.1	Soltu.Atl_v3.07_3G015150			MYB	PF00249	Myb-like DNA-binding domain	6.7e-33	112.5	CA07g12950	61.9	2.65e-91
Soltu.Atl_v3.02_1G026870.1	Soltu.Atl_v3.02_1G026870			Dof	PF02701	Dof domain, zinc finger	6.6e-33	112.5	PGSC0003DMP400017726	97.2	1.07e-200
Soltu.Atl_v3.02_4G021230.1	Soltu.Atl_v3.02_4G021230			Dof	PF02701	Dof domain, zinc finger	6.6e-33	112.5	PGSC0003DMP400017726	97.2	1.07e-200
Soltu.Atl_v3.11_4G015460.2	Soltu.Atl_v3.11_4G015460			Dof	PF02701	Dof domain, zinc finger	6.6e-33	112.5	PGSC0003DMP400000873	100	6.18e-164
Soltu.Atl_v3.02_2G029100.1	Soltu.Atl_v3.02_2G029100			Dof	PF02701	Dof domain, zinc finger	6.5e-33	112.5	PGSC0003DMP400017726	95.1	1.52e-196
Soltu.Atl_v3.02_2G017180.2	Soltu.Atl_v3.02_2G017180			Dof	PF02701	Dof domain, zinc finger	6.4e-33	112.6	PGSC0003DMP400051750	84.1	4.26e-115
Soltu.Atl_v3.05_2G017300.1	Soltu.Atl_v3.05_2G017300			MYB	PF00249	Myb-like DNA-binding domain	6.3e-33	112.6	PGSC0003DMP400037546	97.8	1.02e-229
Soltu.Atl_v3.11_0G011980.2	Soltu.Atl_v3.11_0G011980			Dof	PF02701	Dof domain, zinc finger	6.3e-33	112.6	PGSC0003DMP400000873	99.2	2.93e-162
Soltu.Atl_v3.11_3G015510.2	Soltu.Atl_v3.11_3G015510			Dof	PF02701	Dof domain, zinc finger	6.3e-33	112.6	PGSC0003DMP400000873	99.2	2.93e-162
Soltu.Atl_v3.05_1G003080.1	Soltu.Atl_v3.05_1G003080			MYB	PF00249	Myb-like DNA-binding domain	6.2e-33	112.6	PGSC0003DMP400025629	94.1	6.6e-189
Soltu.Atl_v3.05_1G018420.1	Soltu.Atl_v3.05_1G018420			MYB	PF00249	Myb-like DNA-binding domain	6.2e-33	112.6	PGSC0003DMP400037546	98.1	1.06e-229
Soltu.Atl_v3.07_3G015490.1	Soltu.Atl_v3.07_3G015490			B3	PF02362	B3 DNA binding domain	6e-33	112.6	PGSC0003DMP400032011	92.9	2.950000000017E-313
Soltu.Atl_v3.08_4G001330.1	Soltu.Atl_v3.08_4G001330			ARF	PF06507	Auxin response factor	6.5e-33	112.7	PGSC0003DMP400021708	65.4	5.52e-285
Soltu.Atl_v3.08_4G001330.2	Soltu.Atl_v3.08_4G001330			ARF	PF06507	Auxin response factor	6.5e-33	112.7	PGSC0003DMP400021708	65.5	2.08e-285
Soltu.Atl_v3.08_1G002260.1	Soltu.Atl_v3.08_1G002260			ARF	PF06507	Auxin response factor	6.4e-33	112.7	PGSC0003DMP400021708	64.7	2.85e-292
Soltu.Atl_v3.08_1G002260.2	Soltu.Atl_v3.08_1G002260			ARF	PF06507	Auxin response factor	6.4e-33	112.7	PGSC0003DMP400021708	64.7	4.36e-292
Soltu.Atl_v3.02_4G005030.1	Soltu.Atl_v3.02_4G005030			ARF	PF06507	Auxin response factor	6.3e-33	112.7	PGSC0003DMP400032529	73.3	0
Soltu.Atl_v3.02_4G005030.2	Soltu.Atl_v3.02_4G005030			ARF	PF06507	Auxin response factor	6.3e-33	112.7	PGSC0003DMP400032529	73.3	0
Soltu.Atl_v3.08_4G001330.5	Soltu.Atl_v3.08_4G001330			ARF	PF06507	Auxin response factor	6.2e-33	112.8	PGSC0003DMP400021708	63.2	3.1e-270
Soltu.Atl_v3.08_3G002980.3	Soltu.Atl_v3.08_3G002980			ARF	PF06507	Auxin response factor	6.1e-33	112.8	PGSC0003DMP400021708	66	1.15e-291
Soltu.Atl_v3.08_3G002980.4	Soltu.Atl_v3.08_3G002980			ARF	PF06507	Auxin response factor	6.1e-33	112.8	PGSC0003DMP400021708	66.1	4.36e-292
Soltu.Atl_v3.08_4G001330.3	Soltu.Atl_v3.08_4G001330			ARF	PF06507	Auxin response factor	6e-33	112.8	PGSC0003DMP400021708	65.1	4.31e-272
Soltu.Atl_v3.02_4G005060.1	Soltu.Atl_v3.02_4G005060			ARF	PF06507	Auxin response factor	5.9e-33	112.8	PGSC0003DMP400032529	76.3	0
Soltu.Atl_v3.08_4G001330.6	Soltu.Atl_v3.08_4G001330			ARF	PF06507	Auxin response factor	5.9e-33	112.8	PGSC0003DMP400021708	65	1.61e-262
Soltu.Atl_v3.02_2G004780.1	Soltu.Atl_v3.02_2G004780			ARF	PF06507	Auxin response factor	5.8e-33	112.8	PGSC0003DMP400032529	73.3	0
Soltu.Atl_v3.02_2G004780.2	Soltu.Atl_v3.02_2G004780			ARF	PF06507	Auxin response factor	5.8e-33	112.8	PGSC0003DMP400032529	73.3	0
Soltu.Atl_v3.02_3G004890.1	Soltu.Atl_v3.02_3G004890			ARF	PF06507	Auxin response factor	5.8e-33	112.8	PGSC0003DMP400032529	73.1	0
Soltu.Atl_v3.02_3G004890.2	Soltu.Atl_v3.02_3G004890			ARF	PF06507	Auxin response factor	5.8e-33	112.8	PGSC0003DMP400032529	73.1	0
Soltu.Atl_v3.08_1G002260.3	Soltu.Atl_v3.08_1G002260			ARF	PF06507	Auxin response factor	5.8e-33	112.8	PGSC0003DMP400021708	65.5	1.37e-268
Soltu.Atl_v3.08_1G017560.1	Soltu.Atl_v3.08_1G017560			MYB	PF00249	Myb-like DNA-binding domain	5.3e-33	112.8	Sopim08g081500.0.1	96.7	1.43e-222
MSTRG.39171.1	Soltu.Atl_v3.05_4G017730			MYB	PF00249	Myb-like DNA-binding domain	5.2e-33	112.8	PGSC0003DMP400037546	97.8	1.57e-229
MSTRG.39171.2	Soltu.Atl_v3.05_4G017730			MYB	PF00249	Myb-like DNA-binding domain	5.2e-33	112.8	PGSC0003DMP400037546	97.8	1.57e-229
Soltu.Atl_v3.05_3G018540.1	Soltu.Atl_v3.05_3G018540			MYB	PF00249	Myb-like DNA-binding domain	5.2e-33	112.8	PGSC0003DMP400037546	98.4	9.46e-231
Soltu.Atl_v3.05_4G017730.1	Soltu.Atl_v3.05_4G017730			MYB	PF00249	Myb-like DNA-binding domain	5.2e-33	112.8	PGSC0003DMP400037546	97.8	1.57e-229
Soltu.Atl_v3.08_3G002980.1	Soltu.Atl_v3.08_3G002980			ARF	PF06507	Auxin response factor	5.5e-33	112.9	PGSC0003DMP400021708	65.6	3.38e-269
Soltu.Atl_v3.08_3G002980.6	Soltu.Atl_v3.08_3G002980			ARF	PF06507	Auxin response factor	5.5e-33	112.9	PGSC0003DMP400021708	65.6	3.38e-269
Soltu.Atl_v3.03_0G007600.1	Soltu.Atl_v3.03_0G007600			Dof	PF02701	Dof domain, zinc finger	5.2e-33	112.9	PGSC0003DMP400004435	94.2	3.31e-117
Soltu.Atl_v3.03_0G007910.1	Soltu.Atl_v3.03_0G007910			Dof	PF02701	Dof domain, zinc finger	5.2e-33	112.9	PGSC0003DMP400004435	94.2	3.31e-117
Soltu.Atl_v3.08_3G003070.1	Soltu.Atl_v3.08_3G003070			Dof	PF02701	Dof domain, zinc finger	5.2e-33	112.9	PGSC0003DMP400010277	97.9	4.92e-163
Soltu.Atl_v3.08_0G011390.1	Soltu.Atl_v3.08_0G011390			MYB	PF00249	Myb-like DNA-binding domain	5e-33	112.9	Sopim08g081500.0.1	95.8	8.15e-219
Soltu.Atl_v3.03_1G031400.1	Soltu.Atl_v3.03_1G031400			Dof	PF02701	Dof domain, zinc finger	4.9e-33	112.9	PGSC0003DMP400004435	100	3.03e-133
Soltu.Atl_v3.08_4G001330.4	Soltu.Atl_v3.08_4G001330			ARF	PF06507	Auxin response factor	5.4e-33	113	PGSC0003DMP400021708	63.5	3.55e-235
Soltu.Atl_v3.08_4G001330.7	Soltu.Atl_v3.08_4G001330			ARF	PF06507	Auxin response factor	5.4e-33	113	PGSC0003DMP400021708	63.5	3.55e-235
Soltu.Atl_v3.02_3G004900.1	Soltu.Atl_v3.02_3G004900			ARF	PF06507	Auxin response factor	5.2e-33	113	Solyc02g037530.2.1	93.1	0
MSTRG.14643.1	Soltu.Atl_v3.02_3G004890			ARF	PF06507	Auxin response factor	5.1e-33	113	PGSC0003DMP400032531	74.6	3.02e-303
Soltu.Atl_v3.08_3G002980.2	Soltu.Atl_v3.08_3G002980			ARF	PF06507	Auxin response factor	5.1e-33	113	PGSC0003DMP400021708	64.3	5.19e-243
MSTRG.12446.5	Soltu.Atl_v3.02_2G004760			ARF	PF06507	Auxin response factor	5e-33	113	PGSC0003DMP400032530	75.9	3.23e-308
Soltu.Atl_v3.07_4G021690.1	Soltu.Atl_v3.07_4G021690			SBP	PF03110	SBP domain	5e-33	113	PGSC0003DMP400056849	92.6	2.69e-87
Soltu.Atl_v3.08_3G002980.5	Soltu.Atl_v3.08_3G002980			ARF	PF06507	Auxin response factor	5e-33	113	PGSC0003DMP400021708	64.5	8.73e-244
Soltu.Atl_v3.07_1G017650.1	Soltu.Atl_v3.07_1G017650			SBP	PF03110	SBP domain	4.9e-33	113	PGSC0003DMP400056849	92.5	7.41e-89
Soltu.Atl_v3.07_2G016260.1	Soltu.Atl_v3.07_2G016260			SBP	PF03110	SBP domain	4.9e-33	113	PGSC0003DMP400056849	93.4	1.34e-87
Soltu.Atl_v3.08_1G002390.1	Soltu.Atl_v3.08_1G002390			Dof	PF02701	Dof domain, zinc finger	4.8e-33	113	PGSC0003DMP400010277	94.6	3.49e-155
Soltu.Atl_v3.11_4G015460.1	Soltu.Atl_v3.11_4G015460			Dof	PF02701	Dof domain, zinc finger	4.8e-33	113	PGSC0003DMP400000873	100	1.41e-164
Soltu.Atl_v3.06_2G022320.1	Soltu.Atl_v3.06_2G022320			MYB	PF00249	Myb-like DNA-binding domain	4.7e-33	113	PGSC0003DMP400055794	96.3	3.2e-221
Soltu.Atl_v3.06_3G016260.1	Soltu.Atl_v3.06_3G016260			MYB	PF00249	Myb-like DNA-binding domain	4.7e-33	113	PGSC0003DMP400055794	96.3	3.2e-221
Soltu.Atl_v3.07_3G015080.1	Soltu.Atl_v3.07_3G015080			MYB	PF00249	Myb-like DNA-binding domain	4.6e-33	113	Solyc07g054960.1.1	91.6	4.89e-117
Soltu.Atl_v3.07_3G015130.1	Soltu.Atl_v3.07_3G015130			MYB	PF00249	Myb-like DNA-binding domain	4.6e-33	113	Solyc07g054960.1.1	89.3	4.46e-113
Soltu.Atl_v3.11_0G011980.1	Soltu.Atl_v3.11_0G011980			Dof	PF02701	Dof domain, zinc finger	4.6e-33	113	PGSC0003DMP400000873	99.2	6.69e-163
Soltu.Atl_v3.11_3G015510.1	Soltu.Atl_v3.11_3G015510			Dof	PF02701	Dof domain, zinc finger	4.6e-33	113	PGSC0003DMP400000873	99.2	6.69e-163
Soltu.Atl_v3.06_1G011140.1	Soltu.Atl_v3.06_1G011140			MYB	PF00249	Myb-like DNA-binding domain	4.5e-33	113	PGSC0003DMP400055794	96.3	4.61e-226
Soltu.Atl_v3.06_4G015540.1	Soltu.Atl_v3.06_4G015540			MYB	PF00249	Myb-like DNA-binding domain	4.5e-33	113	PGSC0003DMP400055794	96.3	4.61e-226
Soltu.Atl_v3.03_0G003520.1	Soltu.Atl_v3.03_0G003520			MYB	PF00249	Myb-like DNA-binding domain	4.4e-33	113	PGSC0003DMP400054072	96.8	1.94e-180
Soltu.Atl_v3.03_1G016830.1	Soltu.Atl_v3.03_1G016830			MYB	PF00249	Myb-like DNA-binding domain	4.4e-33	113	PGSC0003DMP400054072	96.8	1.94e-180
Soltu.Atl_v3.03_3G024690.1	Soltu.Atl_v3.03_3G024690			MYB	PF00249	Myb-like DNA-binding domain	4.4e-33	113	PGSC0003DMP400054072	97.2	6.76e-181
Soltu.Atl_v3.03_4G015350.1	Soltu.Atl_v3.03_4G015350			MYB	PF00249	Myb-like DNA-binding domain	4.4e-33	113	PGSC0003DMP400054072	98	4.07e-182
MSTRG.62835.9	Soltu.Atl_v3.09_3G023450			Nin-like	PF02042	RWP-RK domain	4e-33	113	PGSC0003DMP400051646	84.6	2.55e-265
MSTRG.85375.1	Soltu.Atl_v3.S107940			C3H	PF00642	Zinc finger C-x8-C-x5-C-x3-H type (and similar)	2.9e-33	113	PGSC0003DMP400026613	90.9	9.89e-145
Soltu.Atl_v3.10_2G004290.2	Soltu.Atl_v3.10_2G004290			SBP	PF03110	SBP domain	4.8e-33	113.1	PGSC0003DMP400039577	100	2.99e-93
Soltu.Atl_v3.10_3G002730.2	Soltu.Atl_v3.10_3G002730			SBP	PF03110	SBP domain	4.8e-33	113.1	PGSC0003DMP400039577	100	2.99e-93
Soltu.Atl_v3.03_2G014640.2	Soltu.Atl_v3.03_2G014640			MYB	PF00249	Myb-like DNA-binding domain	4.2e-33	113.1	PGSC0003DMP400054072	96.8	1.03e-177
Soltu.Atl_v3.03_0G003520.2	Soltu.Atl_v3.03_0G003520			MYB	PF00249	Myb-like DNA-binding domain	4.1e-33	113.1	PGSC0003DMP400054072	98.8	5.74e-183
Soltu.Atl_v3.03_1G016830.2	Soltu.Atl_v3.03_1G016830			MYB	PF00249	Myb-like DNA-binding domain	4.1e-33	113.1	PGSC0003DMP400054072	98.8	5.74e-183
Soltu.Atl_v3.03_3G024690.2	Soltu.Atl_v3.03_3G024690			MYB	PF00249	Myb-like DNA-binding domain	4.1e-33	113.1	PGSC0003DMP400054072	99.2	2.85e-183
Soltu.Atl_v3.03_4G015350.2	Soltu.Atl_v3.03_4G015350			MYB	PF00249	Myb-like DNA-binding domain	4.1e-33	113.1	PGSC0003DMP400054072	100	1.71e-184
Soltu.Atl_v3.03_4G015350.4	Soltu.Atl_v3.03_4G015350			MYB	PF00249	Myb-like DNA-binding domain	4.1e-33	113.1	PGSC0003DMP400054072	100	1.71e-184
Soltu.Atl_v3.05_2G005300.2	Soltu.Atl_v3.05_2G005300			TCP	PF03634	TCP family transcription factor	1.5e-32	113.2	PGSC0003DMP400006051	94.5	2.13e-117
Soltu.Atl_v3.02_3G004900.3	Soltu.Atl_v3.02_3G004900			ARF	PF06507	Auxin response factor	4.6e-33	113.2	PGSC0003DMP400032529	77.8	0
Soltu.Atl_v3.02_3G004900.2	Soltu.Atl_v3.02_3G004900			ARF	PF06507	Auxin response factor	4.5e-33	113.2	PGSC0003DMP400032529	77.8	0
Soltu.Atl_v3.10_1G003960.1	Soltu.Atl_v3.10_1G003960			Dof	PF02701	Dof domain, zinc finger	4.2e-33	113.2	Solyc10g009360.2.1	92.7	2.46e-166
Soltu.Atl_v3.10_2G004650.2	Soltu.Atl_v3.10_2G004650			Dof	PF02701	Dof domain, zinc finger	4.1e-33	113.2	Solyc10g009360.2.1	89.3	1.53e-164
Soltu.Atl_v3.10_3G003130.2	Soltu.Atl_v3.10_3G003130			Dof	PF02701	Dof domain, zinc finger	4.1e-33	113.2	Solyc10g009360.2.1	89.3	1.53e-164
Soltu.Atl_v3.02_1G008660.2	Soltu.Atl_v3.02_1G008660			MYB	PF00249	Myb-like DNA-binding domain	4e-33	113.2	PGSC0003DMP400012271	89	1.55e-141
Soltu.Atl_v3.03_2G014640.1	Soltu.Atl_v3.03_2G014640			MYB	PF00249	Myb-like DNA-binding domain	3.9e-33	113.2	PGSC0003DMP400054072	98.8	4.35e-180
Soltu.Atl_v3.08_1G001520.3	Soltu.Atl_v3.08_1G001520			HSF	PF00447	HSF-type DNA-binding	5.5e-33	113.3	PGSC0003DMP400026069	63.2	9.91e-189
Soltu.Atl_v3.08_4G001330.8	Soltu.Atl_v3.08_4G001330			ARF	PF06507	Auxin response factor	4.3e-33	113.3	PGSC0003DMP400021708	63.9	2e-205
Soltu.Atl_v3.08_4G001330.9	Soltu.Atl_v3.08_4G001330			ARF	PF06507	Auxin response factor	4.3e-33	113.3	PGSC0003DMP400021708	63.9	2e-205
Soltu.Atl_v3.10_1G003960.2	Soltu.Atl_v3.10_1G003960			Dof	PF02701	Dof domain, zinc finger	3.9e-33	113.3	PGSC0003DMP400000266	54	8.81e-78
MSTRG.66748.4	Soltu.Atl_v3.10_2G004650			Dof	PF02701	Dof domain, zinc finger	3.8e-33	113.3	PGSC0003DMP400000266	55.6	4.39e-80
Soltu.Atl_v3.03_4G019190.1	Soltu.Atl_v3.03_4G019190			Dof	PF02701	Dof domain, zinc finger	3.8e-33	113.3	PGSC0003DMP400031524	98.8	1.43e-224
Soltu.Atl_v3.10_2G004650.1	Soltu.Atl_v3.10_2G004650			Dof	PF02701	Dof domain, zinc finger	3.8e-33	113.3	PGSC0003DMP400000266	55.6	4.39e-80
Soltu.Atl_v3.10_2G004650.3	Soltu.Atl_v3.10_2G004650			Dof	PF02701	Dof domain, zinc finger	3.8e-33	113.3	PGSC0003DMP400000266	55.6	4.39e-80
Soltu.Atl_v3.10_3G003130.1	Soltu.Atl_v3.10_3G003130			Dof	PF02701	Dof domain, zinc finger	3.8e-33	113.3	PGSC0003DMP400000266	55.6	4.39e-80
Soltu.Atl_v3.10_3G003130.3	Soltu.Atl_v3.10_3G003130			Dof	PF02701	Dof domain, zinc finger	3.8e-33	113.3	PGSC0003DMP400000266	55.6	4.39e-80
Soltu.Atl_v3.08_3G002980.7	Soltu.Atl_v3.08_3G002980			ARF	PF06507	Auxin response factor	4e-33	113.4	PGSC0003DMP400021708	63.9	9.36e-209
Soltu.Atl_v3.02_2G017180.1	Soltu.Atl_v3.02_2G017180			Dof	PF02701	Dof domain, zinc finger	3.6e-33	113.4	PGSC0003DMP400051749	85.7	3.68e-83
Soltu.Atl_v3.11_3G017790.1	Soltu.Atl_v3.11_3G017790			ARF	PF06507	Auxin response factor	3.7e-33	113.5	PGSC0003DMP400014194	99.3	0
MSTRG.70415.1	Soltu.Atl_v3.11_1G015980			ARF	PF06507	Auxin response factor	3.6e-33	113.5	PGSC0003DMP400014194	99.5	0
Soltu.Atl_v3.07_1G012150.1	Soltu.Atl_v3.07_1G012150			MYB	PF00249	Myb-like DNA-binding domain	3.1e-33	113.5	CA07g12950	62.8	5.63e-93
Soltu.Atl_v3.08_1G001520.1	Soltu.Atl_v3.08_1G001520			HSF	PF00447	HSF-type DNA-binding	4.6e-33	113.6	PGSC0003DMP400026069	63.2	6.09e-190
Soltu.Atl_v3.08_1G001520.2	Soltu.Atl_v3.08_1G001520			HSF	PF00447	HSF-type DNA-binding	4.6e-33	113.6	PGSC0003DMP400026069	63.2	1.56e-190
Soltu.Atl_v3.08_2G000690.1	Soltu.Atl_v3.08_2G000690			HSF	PF00447	HSF-type DNA-binding	4.6e-33	113.6	PGSC0003DMP400026069	63.7	1.93e-189
Soltu.Atl_v3.08_3G002120.1	Soltu.Atl_v3.08_3G002120			HSF	PF00447	HSF-type DNA-binding	4.6e-33	113.6	PGSC0003DMP400026069	61.7	9.87e-194
Soltu.Atl_v3.08_4G000690.1	Soltu.Atl_v3.08_4G000690			HSF	PF00447	HSF-type DNA-binding	4.6e-33	113.6	PGSC0003DMP400026069	63.7	1.93e-189
Soltu.Atl_v3.11_1G015980.1	Soltu.Atl_v3.11_1G015980			ARF	PF06507	Auxin response factor	3.3e-33	113.6	PGSC0003DMP400014194	99.6	0
Soltu.Atl_v3.02_4G000040.1	Soltu.Atl_v3.02_4G000040			Dof	PF02701	Dof domain, zinc finger	3.1e-33	113.6	PGSC0003DMP400050832	89.3	2.72e-190
Soltu.Atl_v3.06_1G002850.1	Soltu.Atl_v3.06_1G002850			Dof	PF02701	Dof domain, zinc finger	3.1e-33	113.6	PGSC0003DMP400050832	89	1.29e-188
Soltu.Atl_v3.07_2G011760.2	Soltu.Atl_v3.07_2G011760			MYB	PF00249	Myb-like DNA-binding domain	3e-33	113.6	CA07g12950	60.7	3.97e-93
Soltu.Atl_v3.07_4G016260.1	Soltu.Atl_v3.07_4G016260			MYB	PF00249	Myb-like DNA-binding domain	3e-33	113.6	CA07g12950	61.1	9.79e-94
Soltu.Atl_v3.03_1G006010.1	Soltu.Atl_v3.03_1G006010			MYB	PF00249	Myb-like DNA-binding domain	2.8e-33	113.7	PGSC0003DMP400014987	99	2.34e-217
Soltu.Atl_v3.03_2G006300.1	Soltu.Atl_v3.03_2G006300			MYB	PF00249	Myb-like DNA-binding domain	2.8e-33	113.7	PGSC0003DMP400014987	100	6.99e-219
Soltu.Atl_v3.03_3G010320.1	Soltu.Atl_v3.03_3G010320			MYB	PF00249	Myb-like DNA-binding domain	2.8e-33	113.7	PGSC0003DMP400014987	93.5	1.37e-200
Soltu.Atl_v3.10_0G000960.1	Soltu.Atl_v3.10_0G000960			MYB	PF00249	Myb-like DNA-binding domain	2.8e-33	113.7	PGSC0003DMP400015271	96.6	2.86e-241
Soltu.Atl_v3.05_2G002880.1	Soltu.Atl_v3.05_2G002880			MYB	PF00249	Myb-like DNA-binding domain	2.7e-33	113.7	PGSC0003DMP400025629	100	2.55e-203
Soltu.Atl_v3.05_3G003260.1	Soltu.Atl_v3.05_3G003260			MYB	PF00249	Myb-like DNA-binding domain	2.7e-33	113.7	PGSC0003DMP400025629	100	2.55e-203
Soltu.Atl_v3.07_3G009510.1	Soltu.Atl_v3.07_3G009510			LBD (AS2/LOB)	PF03195	Protein of unknown function DUF260	3.6e-33	113.8	XP_009801618.1	77.3	2.06e-72
Soltu.Atl_v3.02_2G032090.1	Soltu.Atl_v3.02_2G032090			MYB	PF00249	Myb-like DNA-binding domain	2.7e-33	113.8	PGSC0003DMP400002379	98.3	2.27e-211
Soltu.Atl_v3.03_4G015350.3	Soltu.Atl_v3.03_4G015350			MYB	PF00249	Myb-like DNA-binding domain	2.7e-33	113.8	PGSC0003DMP400054072	100	3.1e-130
Soltu.Atl_v3.03_4G015350.5	Soltu.Atl_v3.03_4G015350			MYB	PF00249	Myb-like DNA-binding domain	2.7e-33	113.8	PGSC0003DMP400054072	100	3.1e-130
Soltu.Atl_v3.05_4G003210.1	Soltu.Atl_v3.05_4G003210			MYB	PF00249	Myb-like DNA-binding domain	2.6e-33	113.8	PGSC0003DMP400025629	95.2	1.24e-193
Soltu.Atl_v3.08_0G004450.8	Soltu.Atl_v3.08_0G004450			B3	PF02362	B3 DNA binding domain	2.5e-33	113.8	PGSC0003DMP400016864	82.4	5.48e-182
Soltu.Atl_v3.03_0G003520.3	Soltu.Atl_v3.03_0G003520			MYB	PF00249	Myb-like DNA-binding domain	2.4e-33	113.9	PGSC0003DMP400054072	98.3	7.18e-129
Soltu.Atl_v3.03_1G016830.3	Soltu.Atl_v3.03_1G016830			MYB	PF00249	Myb-like DNA-binding domain	2.4e-33	113.9	PGSC0003DMP400054072	98.3	7.18e-129
Soltu.Atl_v3.02_2G004790.1	Soltu.Atl_v3.02_2G004790			ARF	PF06507	Auxin response factor	2.5e-33	114	Solyc02g037530.2.1	90.4	0
Soltu.Atl_v3.02_2G004790.3	Soltu.Atl_v3.02_2G004790			ARF	PF06507	Auxin response factor	2.5e-33	114	Solyc02g037530.2.1	90.4	0
Soltu.Atl_v3.02_3G017810.4	Soltu.Atl_v3.02_3G017810			SBP	PF03110	SBP domain	2.5e-33	114	PGSC0003DMP400051752	100	4.76e-95
Soltu.Atl_v3.02_4G015060.4	Soltu.Atl_v3.02_4G015060			SBP	PF03110	SBP domain	2.5e-33	114	PGSC0003DMP400051752	100	4.76e-95
Soltu.Atl_v3.06_1G009790.1	Soltu.Atl_v3.06_1G009790			Dof	PF02701	Dof domain, zinc finger	2.4e-33	114	PGSC0003DMP400004435	50	2.08e-56
Soltu.Atl_v3.06_4G014190.1	Soltu.Atl_v3.06_4G014190			Dof	PF02701	Dof domain, zinc finger	2.4e-33	114	PGSC0003DMP400004435	50	2.08e-56
Soltu.Atl_v3.03_1G026050.1	Soltu.Atl_v3.03_1G026050			MYB	PF00249	Myb-like DNA-binding domain	2.2e-33	114	PGSC0003DMP400033945	97.6	3.71e-236
Soltu.Atl_v3.03_2G023830.1	Soltu.Atl_v3.03_2G023830			MYB	PF00249	Myb-like DNA-binding domain	2.2e-33	114	PGSC0003DMP400033945	97.9	3.83e-235
Soltu.Atl_v3.01_0G013760.1	Soltu.Atl_v3.01_0G013760			GeBP	PF04504	Protein of unknown function, DUF573	3.2e-33	114.1	PGSC0003DMP400038957	100	6.92e-240
Soltu.Atl_v3.01_2G029260.1	Soltu.Atl_v3.01_2G029260			GeBP	PF04504	Protein of unknown function, DUF573	3.2e-33	114.1	PGSC0003DMP400038957	100	6.92e-240
Soltu.Atl_v3.01_4G025180.1	Soltu.Atl_v3.01_4G025180			GeBP	PF04504	Protein of unknown function, DUF573	3.2e-33	114.1	PGSC0003DMP400038957	100	6.92e-240
Soltu.Atl_v3.01_1G024390.1	Soltu.Atl_v3.01_1G024390			GeBP	PF04504	Protein of unknown function, DUF573	3.1e-33	114.1	PGSC0003DMP400038957	98.2	4.61e-237
Soltu.Atl_v3.03_3G031900.1	Soltu.Atl_v3.03_3G031900			MYB	PF00249	Myb-like DNA-binding domain	2.1e-33	114.1	PGSC0003DMP400033945	97.3	6.35e-234
MSTRG.2541.1	Soltu.Atl_v3.01_1G024390			GeBP	PF04504	Protein of unknown function, DUF573	3e-33	114.2	PGSC0003DMP400038957	96.4	1.59e-235
Soltu.Atl_v3.07_1G007000.1	Soltu.Atl_v3.07_1G007000			LBD (AS2/LOB)	PF03195	Protein of unknown function DUF260	2.6e-33	114.2	XP_009801618.1	78.3	9.74e-75
Soltu.Atl_v3.07_2G006470.1	Soltu.Atl_v3.07_2G006470			LBD (AS2/LOB)	PF03195	Protein of unknown function DUF260	2.6e-33	114.2	XP_009801618.1	78.3	9.74e-75
Soltu.Atl_v3.02_2G004790.2	Soltu.Atl_v3.02_2G004790			ARF	PF06507	Auxin response factor	2.3e-33	114.2	Solyc02g037530.2.1	91.3	0
Soltu.Atl_v3.10_1G003670.2	Soltu.Atl_v3.10_1G003670			SBP	PF03110	SBP domain	2.1e-33	114.2	PGSC0003DMP400039577	94.1	7.61e-87
Soltu.Atl_v3.07_4G008960.1	Soltu.Atl_v3.07_4G008960			LBD (AS2/LOB)	PF03195	Protein of unknown function DUF260	2.5e-33	114.3	XP_009801618.1	77.6	3.23e-73
Soltu.Atl_v3.02_1G003750.1	Soltu.Atl_v3.02_1G003750			ARF	PF06507	Auxin response factor	1.9e-33	114.4	Solyc02g037530.2.1	93.4	0
Soltu.Atl_v3.02_1G003750.2	Soltu.Atl_v3.02_1G003750			ARF	PF06507	Auxin response factor	1.9e-33	114.4	Sopen02g011920.1	91.8	0
Soltu.Atl_v3.02_1G003750.4	Soltu.Atl_v3.02_1G003750			ARF	PF06507	Auxin response factor	1.9e-33	114.4	Sopen02g011920.1	91.2	0
Soltu.Atl_v3.03_2G020470.1	Soltu.Atl_v3.03_2G020470			Dof	PF02701	Dof domain, zinc finger	1.8e-33	114.4	PGSC0003DMP400031524	88.9	5.6e-208
MSTRG.28822.2	Soltu.Atl_v3.04_1G019250			Dof	PF02701	Dof domain, zinc finger	1.7e-33	114.4	PGSC0003DMP400020702	100	5.91e-98
MSTRG.33536.2	Soltu.Atl_v3.04_4G019860			Dof	PF02701	Dof domain, zinc finger	1.7e-33	114.4	PGSC0003DMP400020702	100	6.38e-98
Soltu.Atl_v3.01_4G013650.1	Soltu.Atl_v3.01_4G013650			MYB	PF00249	Myb-like DNA-binding domain	1.7e-33	114.4	PGSC0003DMP400015397	99.7	6.5e-209
Soltu.Atl_v3.03_1G022970.1	Soltu.Atl_v3.03_1G022970			Dof	PF02701	Dof domain, zinc finger	1.7e-33	114.4	PGSC0003DMP400031524	95.2	4.32e-211
Soltu.Atl_v3.03_3G028430.1	Soltu.Atl_v3.03_3G028430			Dof	PF02701	Dof domain, zinc finger	1.7e-33	114.4	PGSC0003DMP400031524	96.1	2.73e-214
Soltu.Atl_v3.04_1G019250.1	Soltu.Atl_v3.04_1G019250			Dof	PF02701	Dof domain, zinc finger	1.7e-33	114.4	PGSC0003DMP400020702	100	5.91e-98
Soltu.Atl_v3.04_2G017930.1	Soltu.Atl_v3.04_2G017930			Dof	PF02701	Dof domain, zinc finger	1.7e-33	114.4	PGSC0003DMP400020702	100	5.91e-98
Soltu.Atl_v3.04_3G019460.1	Soltu.Atl_v3.04_3G019460			Dof	PF02701	Dof domain, zinc finger	1.7e-33	114.4	PGSC0003DMP400020702	100	5.91e-98
Soltu.Atl_v3.04_4G019860.1	Soltu.Atl_v3.04_4G019860			Dof	PF02701	Dof domain, zinc finger	1.7e-33	114.4	PGSC0003DMP400020702	100	6.38e-98
Soltu.Atl_v3.02_1G003750.3	Soltu.Atl_v3.02_1G003750			ARF	PF06507	Auxin response factor	1.7e-33	114.5	Sopen02g011920.1	91.7	0
Soltu.Atl_v3.02_1G026950.1	Soltu.Atl_v3.02_1G026950			Dof	PF02701	Dof domain, zinc finger	1.6e-33	114.5	PGSC0003DMP400017852	100	9.54e-180
Soltu.Atl_v3.02_2G029190.1	Soltu.Atl_v3.02_2G029190			Dof	PF02701	Dof domain, zinc finger	1.6e-33	114.5	PGSC0003DMP400017852	100	9.54e-180
Soltu.Atl_v3.02_3G031010.1	Soltu.Atl_v3.02_3G031010			Dof	PF02701	Dof domain, zinc finger	1.6e-33	114.5	PGSC0003DMP400017852	100	9.54e-180
Soltu.Atl_v3.02_4G021310.1	Soltu.Atl_v3.02_4G021310			Dof	PF02701	Dof domain, zinc finger	1.6e-33	114.5	PGSC0003DMP400017852	100	9.54e-180
Soltu.Atl_v3.05_4G020830.1	Soltu.Atl_v3.05_4G020830			MYB	PF00249	Myb-like DNA-binding domain	1.6e-33	114.5	PGSC0003DMP400047253	98.9	1.39e-278
Soltu.Atl_v3.05_1G004390.1	Soltu.Atl_v3.05_1G004390			MYB	PF00249	Myb-like DNA-binding domain	1.5e-33	114.5	PGSC0003DMP400032077	96.1	4.79e-241
Soltu.Atl_v3.05_2G020900.1	Soltu.Atl_v3.05_2G020900			MYB	PF00249	Myb-like DNA-binding domain	1.5e-33	114.5	PGSC0003DMP400047253	99.5	2.41e-279
Soltu.Atl_v3.02_1G003750.8	Soltu.Atl_v3.02_1G003750			ARF	PF06507	Auxin response factor	1.6e-33	114.6	PGSC0003DMP400032529	77.9	0
Soltu.Atl_v3.02_4G009530.1	Soltu.Atl_v3.02_4G009530			MYB	PF00249	Myb-like DNA-binding domain	1.5e-33	114.6	PGSC0003DMP400012270	97	3.96e-210
Soltu.Atl_v3.06_4G004400.2	Soltu.Atl_v3.06_4G004400			Dof	PF02701	Dof domain, zinc finger	1.5e-33	114.6	PGSC0003DMP400050832	99.3	2.22e-201
Soltu.Atl_v3.S039520.1	Soltu.Atl_v3.S039520			MYB	PF00249	Myb-like DNA-binding domain	1.5e-33	114.6	PGSC0003DMP400032077	95.2	6.53e-241
Soltu.Atl_v3.S039580.1	Soltu.Atl_v3.S039580			MYB	PF00249	Myb-like DNA-binding domain	1.5e-33	114.6	PGSC0003DMP400032077	95.2	6.53e-241
Soltu.Atl_v3.02_2G011150.1	Soltu.Atl_v3.02_2G011150			TCP	PF03634	TCP family transcription factor	4.8e-33	114.8	PGSC0003DMP400062336	97.8	3.19e-177
MSTRG.19289.3	MSTRG.19289			ARF	PF06507	Auxin response factor	1.4e-33	114.8	PGSC0003DMP400032529	96.7	0
Soltu.Atl_v3.03_1G001550.1	Soltu.Atl_v3.03_1G001550			Dof	PF02701	Dof domain, zinc finger	1.3e-33	114.8	PGSC0003DMP400022708	100	1.84e-186
Soltu.Atl_v3.03_2G001550.1	Soltu.Atl_v3.03_2G001550			Dof	PF02701	Dof domain, zinc finger	1.3e-33	114.8	PGSC0003DMP400022708	100	1.84e-186
Soltu.Atl_v3.06_4G004400.1	Soltu.Atl_v3.06_4G004400			Dof	PF02701	Dof domain, zinc finger	1.3e-33	114.8	PGSC0003DMP400050832	99.3	3.08e-187
Soltu.Atl_v3.02_3G024870.1	Soltu.Atl_v3.02_3G024870			GeBP	PF04504	Protein of unknown function, DUF573	1.8e-33	114.9	PGSC0003DMP400006375	98.1	3.11e-241
Soltu.Atl_v3.03_0G005980.1	Soltu.Atl_v3.03_0G005980			MYB	PF00249	Myb-like DNA-binding domain	1.2e-33	114.9	PGSC0003DMP400009936	100	2.04e-169
Soltu.Atl_v3.03_1G029330.1	Soltu.Atl_v3.03_1G029330			MYB	PF00249	Myb-like DNA-binding domain	1.2e-33	114.9	PGSC0003DMP400009936	100	2.04e-169
Soltu.Atl_v3.06_1G011740.1	Soltu.Atl_v3.06_1G011740			Dof	PF02701	Dof domain, zinc finger	1.2e-33	114.9	PGSC0003DMP400047058	100	1.55e-214
Soltu.Atl_v3.06_2G019110.1	Soltu.Atl_v3.06_2G019110			Dof	PF02701	Dof domain, zinc finger	1.2e-33	114.9	PGSC0003DMP400004435	54.6	3.41e-59
Soltu.Atl_v3.06_2G022960.1	Soltu.Atl_v3.06_2G022960			Dof	PF02701	Dof domain, zinc finger	1.2e-33	114.9	PGSC0003DMP400047058	98.6	1.74e-211
Soltu.Atl_v3.06_3G016900.1	Soltu.Atl_v3.06_3G016900			Dof	PF02701	Dof domain, zinc finger	1.2e-33	114.9	PGSC0003DMP400047058	98.6	1.74e-211
Soltu.Atl_v3.06_4G016190.1	Soltu.Atl_v3.06_4G016190			Dof	PF02701	Dof domain, zinc finger	1.2e-33	114.9	PGSC0003DMP400047058	100	1.55e-214
Soltu.Atl_v3.S129920.1	Soltu.Atl_v3.S129920			MYB	PF00249	Myb-like DNA-binding domain	1.2e-33	114.9	PGSC0003DMP400009936	99.6	4.76e-168
Soltu.Atl_v3.01_3G021130.1	Soltu.Atl_v3.01_3G021130			MYB	PF00249	Myb-like DNA-binding domain	1.1e-33	114.9	PGSC0003DMP400000076	99.7	2.93e-229
Soltu.Atl_v3.01_4G023840.1	Soltu.Atl_v3.01_4G023840			MYB	PF00249	Myb-like DNA-binding domain	1.1e-33	114.9	PGSC0003DMP400000076	99.7	1.45e-229
Soltu.Atl_v3.02_1G009920.1	Soltu.Atl_v3.02_1G009920			TCP	PF03634	TCP family transcription factor	4e-33	115	PGSC0003DMP400062336	96.5	6.9e-173
Soltu.Atl_v3.10_4G008270.1	Soltu.Atl_v3.10_4G008270			GeBP	PF04504	Protein of unknown function, DUF573	1.8e-33	115	PGSC0003DMP400006375	99.5	9.8e-245
Soltu.Atl_v3.02_2G023600.1	Soltu.Atl_v3.02_2G023600			GeBP	PF04504	Protein of unknown function, DUF573	1.7e-33	115	PGSC0003DMP400006375	96.9	1.18e-233
MSTRG.19289.2	MSTRG.19289			ARF	PF06507	Auxin response factor	1.3e-33	115	PGSC0003DMP400032529	96.7	0
MSTRG.21422.1	MSTRG.21422			ARF	PF06507	Auxin response factor	1.3e-33	115	PGSC0003DMP400032529	96.7	0
Soltu.Atl_v3.02_1G014310.1	Soltu.Atl_v3.02_1G014310			Dof	PF02701	Dof domain, zinc finger	1.1e-33	115	PGSC0003DMP400051791	94.5	6.86e-247
Soltu.Atl_v3.02_3G017820.1	Soltu.Atl_v3.02_3G017820			Dof	PF02701	Dof domain, zinc finger	1.1e-33	115	PGSC0003DMP400051791	100	5.36e-254
Soltu.Atl_v3.02_4G015070.1	Soltu.Atl_v3.02_4G015070			Dof	PF02701	Dof domain, zinc finger	1.1e-33	115	PGSC0003DMP400051791	95	1.2e-249
Soltu.Atl_v3.11_2G014290.1	Soltu.Atl_v3.11_2G014290			Dof	PF02701	Dof domain, zinc finger	1.1e-33	115	PGSC0003DMP400044011	100	5.69e-225
Soltu.Atl_v3.11_3G021040.1	Soltu.Atl_v3.11_3G021040			Dof	PF02701	Dof domain, zinc finger	1.1e-33	115	PGSC0003DMP400044011	96.4	3.83e-217
Soltu.Atl_v3.06_4G005470.1	Soltu.Atl_v3.06_4G005470			HD-ZIP	PF01852	START domain	2.5e-33	115.1	PGSC0003DMP400029101	77.3	1.81e-276
Soltu.Atl_v3.05_0G000310.3	Soltu.Atl_v3.05_0G000310			WRKY	PF03106	WRKY DNA -binding domain	1.2e-33	115.1	PGSC0003DMP400049273	100	3.56e-295
Soltu.Atl_v3.09_4G006700.2	Soltu.Atl_v3.09_4G006700			WRKY	PF03106	WRKY DNA -binding domain	1.2e-33	115.1	PGSC0003DMP400020631	96.4	5.27e-258
Soltu.Atl_v3.11_2G011480.5	Soltu.Atl_v3.11_2G011480			ARF	PF06507	Auxin response factor	1.2e-33	115.1	PGSC0003DMP400014218	99.4	0
Soltu.Atl_v3.11_2G011480.7	Soltu.Atl_v3.11_2G011480			ARF	PF06507	Auxin response factor	1.2e-33	115.1	PGSC0003DMP400014218	98.6	0
Soltu.Atl_v3.11_4G017480.5	Soltu.Atl_v3.11_4G017480			ARF	PF06507	Auxin response factor	1.2e-33	115.1	PGSC0003DMP400014218	99.2	0
Soltu.Atl_v3.11_4G017480.7	Soltu.Atl_v3.11_4G017480			ARF	PF06507	Auxin response factor	1.2e-33	115.1	PGSC0003DMP400014218	99.2	0
Soltu.Atl_v3.06_2G021770.1	Soltu.Atl_v3.06_2G021770			Dof	PF02701	Dof domain, zinc finger	1.1e-33	115.1	PGSC0003DMP400007249	94.4	2.4e-183
Soltu.Atl_v3.06_3G015710.1	Soltu.Atl_v3.06_3G015710			Dof	PF02701	Dof domain, zinc finger	1.1e-33	115.1	PGSC0003DMP400007249	94.4	2.4e-183
Soltu.Atl_v3.11_2G011480.1	Soltu.Atl_v3.11_2G011480			ARF	PF06507	Auxin response factor	1.1e-33	115.1	PGSC0003DMP400014218	99.4	0
Soltu.Atl_v3.11_2G011480.2	Soltu.Atl_v3.11_2G011480			ARF	PF06507	Auxin response factor	1.1e-33	115.1	PGSC0003DMP400014218	99.4	0
Soltu.Atl_v3.11_2G011480.3	Soltu.Atl_v3.11_2G011480			ARF	PF06507	Auxin response factor	1.1e-33	115.1	PGSC0003DMP400014218	99.4	0
Soltu.Atl_v3.11_2G011480.4	Soltu.Atl_v3.11_2G011480			ARF	PF06507	Auxin response factor	1.1e-33	115.1	PGSC0003DMP400014218	99.4	0
Soltu.Atl_v3.11_2G011480.6	Soltu.Atl_v3.11_2G011480			ARF	PF06507	Auxin response factor	1.1e-33	115.1	PGSC0003DMP400014218	99.4	0
Soltu.Atl_v3.11_4G017480.1	Soltu.Atl_v3.11_4G017480			ARF	PF06507	Auxin response factor	1.1e-33	115.1	PGSC0003DMP400014218	100	0
Soltu.Atl_v3.11_4G017480.2	Soltu.Atl_v3.11_4G017480			ARF	PF06507	Auxin response factor	1.1e-33	115.1	PGSC0003DMP400014218	100	0
Soltu.Atl_v3.11_4G017480.3	Soltu.Atl_v3.11_4G017480			ARF	PF06507	Auxin response factor	1.1e-33	115.1	PGSC0003DMP400014218	100	0
Soltu.Atl_v3.11_4G017480.4	Soltu.Atl_v3.11_4G017480			ARF	PF06507	Auxin response factor	1.1e-33	115.1	PGSC0003DMP400014218	100	0
Soltu.Atl_v3.11_4G017480.6	Soltu.Atl_v3.11_4G017480			ARF	PF06507	Auxin response factor	1.1e-33	115.1	PGSC0003DMP400014218	100	0
Soltu.Atl_v3.02_2G017170.1	Soltu.Atl_v3.02_2G017170			Dof	PF02701	Dof domain, zinc finger	1e-33	115.1	PGSC0003DMP400051791	87.8	1.17e-215
Soltu.Atl_v3.01_4G007210.1	Soltu.Atl_v3.01_4G007210			MYB	PF00249	Myb-like DNA-binding domain	9.9e-34	115.1	PGSC0003DMP400042037	100	3.96e-228
Soltu.Atl_v3.02_2G010070.1	Soltu.Atl_v3.02_2G010070			MYB	PF00249	Myb-like DNA-binding domain	9.8e-34	115.1	PGSC0003DMP400012270	90.4	1.07e-201
Soltu.Atl_v3.01_3G006420.1	Soltu.Atl_v3.01_3G006420			MYB	PF00249	Myb-like DNA-binding domain	9.7e-34	115.1	PGSC0003DMP400042037	98.5	5.78e-223
Soltu.Atl_v3.07_4G021450.1	Soltu.Atl_v3.07_4G021450			TCP	PF03634	TCP family transcription factor	3.7e-33	115.2	PGSC0003DMP400021917	99.5	7.33e-269
Soltu.Atl_v3.02_1G021850.1	Soltu.Atl_v3.02_1G021850			GeBP	PF04504	Protein of unknown function, DUF573	1.5e-33	115.2	PGSC0003DMP400006375	95.5	6.04e-233
MSTRG.19289.1	MSTRG.19289			ARF	PF06507	Auxin response factor	1.1e-33	115.2	PGSC0003DMP400032531	96.3	0
Soltu.Atl_v3.11_1G018410.1	Soltu.Atl_v3.11_1G018410			Dof	PF02701	Dof domain, zinc finger	9.9e-34	115.2	PGSC0003DMP400044011	98	2.13e-218
Soltu.Atl_v3.01_2G008040.1	Soltu.Atl_v3.01_2G008040			MYB	PF00249	Myb-like DNA-binding domain	9.7e-34	115.2	PGSC0003DMP400042037	97	1.46e-218
Soltu.Atl_v3.08_1G012640.1	Soltu.Atl_v3.08_1G012640			MYB	PF00249	Myb-like DNA-binding domain	9.7e-34	115.2	PGSC0003DMP400030609	97.5	7.79e-232
Soltu.Atl_v3.03_4G012710.1	Soltu.Atl_v3.03_4G012710			Dof	PF02701	Dof domain, zinc finger	9.6e-34	115.2	PGSC0003DMP400032312	97.7	3.07e-166
Soltu.Atl_v3.03_3G021720.1	Soltu.Atl_v3.03_3G021720			Dof	PF02701	Dof domain, zinc finger	9.5e-34	115.2	PGSC0003DMP400032312	96.6	1.07e-166
Soltu.Atl_v3.09_4G020290.1	Soltu.Atl_v3.09_4G020290			MYB	PF00249	Myb-like DNA-binding domain	9.5e-34	115.2	PGSC0003DMP400030100	99.6	8.5e-197
Soltu.Atl_v3.03_1G019580.1	Soltu.Atl_v3.03_1G019580			Dof	PF02701	Dof domain, zinc finger	9.4e-34	115.2	PGSC0003DMP400032312	99.2	1.12e-168
Soltu.Atl_v3.03_2G016720.1	Soltu.Atl_v3.03_2G016720			Dof	PF02701	Dof domain, zinc finger	9.4e-34	115.2	PGSC0003DMP400032312	99.2	1.12e-168
Soltu.Atl_v3.09_3G021130.1	Soltu.Atl_v3.09_3G021130			MYB	PF00249	Myb-like DNA-binding domain	9.4e-34	115.2	PGSC0003DMP400030100	99.3	4.92e-196
Soltu.Atl_v3.S078870.1	Soltu.Atl_v3.S078870			Dof	PF02701	Dof domain, zinc finger	9.4e-34	115.2	PGSC0003DMP400028150	98.4	8.82e-247
Soltu.Atl_v3.S078940.1	Soltu.Atl_v3.S078940			Dof	PF02701	Dof domain, zinc finger	9.4e-34	115.2	PGSC0003DMP400028150	98.4	8.82e-247
Soltu.Atl_v3.S079010.1	Soltu.Atl_v3.S079010			Dof	PF02701	Dof domain, zinc finger	9.4e-34	115.2	PGSC0003DMP400028150	98.4	8.82e-247
Soltu.Atl_v3.09_2G018520.1	Soltu.Atl_v3.09_2G018520			MYB	PF00249	Myb-like DNA-binding domain	9.3e-34	115.2	PGSC0003DMP400030100	98.9	3.32e-194
Soltu.Atl_v3.07_3G020070.1	Soltu.Atl_v3.07_3G020070			TCP	PF03634	TCP family transcription factor	3.3e-33	115.3	PGSC0003DMP400021917	91.3	8.78e-240
Soltu.Atl_v3.11_4G002180.1	Soltu.Atl_v3.11_4G002180			Dof	PF02701	Dof domain, zinc finger	8.8e-34	115.3	PGSC0003DMP400028150	96.6	5.02e-240
Soltu.Atl_v3.02_3G009910.1	Soltu.Atl_v3.02_3G009910			MYB	PF00249	Myb-like DNA-binding domain	8.6e-34	115.3	PGSC0003DMP400012270	93.9	5.09e-203
Soltu.Atl_v3.07_2G016010.1	Soltu.Atl_v3.07_2G016010			TCP	PF03634	TCP family transcription factor	3.1e-33	115.4	PGSC0003DMP400021917	97.5	7.33e-269
Soltu.Atl_v3.07_1G017390.1	Soltu.Atl_v3.07_1G017390			TCP	PF03634	TCP family transcription factor	3e-33	115.4	PGSC0003DMP400021917	96.5	3.18e-263
Soltu.Atl_v3.11_1G016340.2	Soltu.Atl_v3.11_1G016340			ARF	PF06507	Auxin response factor	9.3e-34	115.4	PGSC0003DMP400014218	99.3	0
Soltu.Atl_v3.11_1G016340.3	Soltu.Atl_v3.11_1G016340			ARF	PF06507	Auxin response factor	9.3e-34	115.4	PGSC0003DMP400014218	99.3	0
Soltu.Atl_v3.11_1G016340.4	Soltu.Atl_v3.11_1G016340			ARF	PF06507	Auxin response factor	9.3e-34	115.4	PGSC0003DMP400014218	99.3	0
Soltu.Atl_v3.11_1G016340.1	Soltu.Atl_v3.11_1G016340			ARF	PF06507	Auxin response factor	9.2e-34	115.4	PGSC0003DMP400014218	99.3	0
MSTRG.10271.7	Soltu.Atl_v3.02_1G003720			ARF	PF06507	Auxin response factor	8.9e-34	115.5	PGSC0003DMP400032529	96.5	2.31e-133
MSTRG.23283.2	MSTRG.23283			ARF	PF06507	Auxin response factor	8.5e-34	115.5	PGSC0003DMP400032529	96.7	0
Soltu.Atl_v3.10_4G002830.2	Soltu.Atl_v3.10_4G002830			SBP	PF03110	SBP domain	8.5e-34	115.5	PGSC0003DMP400039577	93.3	2.18e-86
MSTRG.17665.6	Soltu.Atl_v3.02_4G014690			ARF	PF06507	Auxin response factor	8.4e-34	115.5	PGSC0003DMP400054998	98.4	0
Soltu.Atl_v3.02_3G017410.1	Soltu.Atl_v3.02_3G017410			ARF	PF06507	Auxin response factor	8.4e-34	115.5	PGSC0003DMP400054998	98.5	0
Soltu.Atl_v3.02_3G017410.2	Soltu.Atl_v3.02_3G017410			ARF	PF06507	Auxin response factor	8.4e-34	115.5	PGSC0003DMP400054999	98.5	0
Soltu.Atl_v3.02_3G017410.3	Soltu.Atl_v3.02_3G017410			ARF	PF06507	Auxin response factor	8.4e-34	115.5	PGSC0003DMP400054999	98.5	0
Soltu.Atl_v3.02_3G017410.4	Soltu.Atl_v3.02_3G017410			ARF	PF06507	Auxin response factor	8.4e-34	115.5	PGSC0003DMP400054998	98.5	0
Soltu.Atl_v3.02_3G017410.5	Soltu.Atl_v3.02_3G017410			ARF	PF06507	Auxin response factor	8.4e-34	115.5	PGSC0003DMP400054999	98.5	0
Soltu.Atl_v3.02_4G014690.1	Soltu.Atl_v3.02_4G014690			ARF	PF06507	Auxin response factor	8.4e-34	115.5	PGSC0003DMP400054998	98.4	0
Soltu.Atl_v3.02_4G014690.2	Soltu.Atl_v3.02_4G014690			ARF	PF06507	Auxin response factor	8.4e-34	115.5	PGSC0003DMP400054999	98.4	0
Soltu.Atl_v3.02_4G014690.3	Soltu.Atl_v3.02_4G014690			ARF	PF06507	Auxin response factor	8.4e-34	115.5	PGSC0003DMP400054999	98.4	0
Soltu.Atl_v3.02_4G014690.4	Soltu.Atl_v3.02_4G014690			ARF	PF06507	Auxin response factor	8.4e-34	115.5	PGSC0003DMP400054999	98.4	0
Soltu.Atl_v3.02_4G005010.1	Soltu.Atl_v3.02_4G005010			ARF	PF06507	Auxin response factor	8.3e-34	115.5	Solyc02g037530.2.1	96.4	0
Soltu.Atl_v3.10_2G000570.1	Soltu.Atl_v3.10_2G000570			MYB	PF00249	Myb-like DNA-binding domain	7.8e-34	115.5	PGSC0003DMP400019914	97.1	2.19e-219
Soltu.Atl_v3.02_1G003720.1	Soltu.Atl_v3.02_1G003720			ARF	PF06507	Auxin response factor	8.2e-34	115.6	Solyc02g037530.2.1	96.8	0
Soltu.Atl_v3.02_2G004760.1	Soltu.Atl_v3.02_2G004760			ARF	PF06507	Auxin response factor	8.2e-34	115.6	Solyc02g037530.2.1	96.4	0
Soltu.Atl_v3.02_2G004760.2	Soltu.Atl_v3.02_2G004760			ARF	PF06507	Auxin response factor	8.2e-34	115.6	Solyc02g037530.2.1	96.4	0
Soltu.Atl_v3.03_3G003650.1	Soltu.Atl_v3.03_3G003650			Dof	PF02701	Dof domain, zinc finger	7.5e-34	115.6	PGSC0003DMP400022708	95	2.48e-175
Soltu.Atl_v3.04_1G011330.1	Soltu.Atl_v3.04_1G011330			MYB	PF00249	Myb-like DNA-binding domain	7.2e-34	115.6	PGSC0003DMP400066962	85	2.01e-81
MSTRG.23153.1	MSTRG.23153			ARF	PF06507	Auxin response factor	7.6e-34	115.7	PGSC0003DMP400032529	97.7	0
MSTRG.23283.4	MSTRG.23283			ARF	PF06507	Auxin response factor	7.6e-34	115.7	PGSC0003DMP400032529	96.7	0
Soltu.Atl_v3.02_4G005010.2	Soltu.Atl_v3.02_4G005010			ARF	PF06507	Auxin response factor	7.6e-34	115.7	PGSC0003DMP400032529	80.5	0
Soltu.Atl_v3.02_4G005010.3	Soltu.Atl_v3.02_4G005010			ARF	PF06507	Auxin response factor	7.6e-34	115.7	PGSC0003DMP400032529	80.5	0
MSTRG.10271.1	Soltu.Atl_v3.02_1G003750			ARF	PF06507	Auxin response factor	7.5e-34	115.7	Solyc02g037530.2.1	96.6	0
Soltu.Atl_v3.02_1G003720.2	Soltu.Atl_v3.02_1G003720			ARF	PF06507	Auxin response factor	7.5e-34	115.7	PGSC0003DMP400032529	80.8	0
Soltu.Atl_v3.02_4G005010.4	Soltu.Atl_v3.02_4G005010			ARF	PF06507	Auxin response factor	7.5e-34	115.7	Solyc02g037530.2.1	96.4	0
Soltu.Atl_v3.02_1G003720.3	Soltu.Atl_v3.02_1G003720			ARF	PF06507	Auxin response factor	7.4e-34	115.7	Solyc02g037530.2.1	96.9	0
Soltu.Atl_v3.02_2G004760.3	Soltu.Atl_v3.02_2G004760			ARF	PF06507	Auxin response factor	7.4e-34	115.7	PGSC0003DMP400032529	80.8	0
Soltu.Atl_v3.06_1G010550.1	Soltu.Atl_v3.06_1G010550			Dof	PF02701	Dof domain, zinc finger	6.9e-34	115.7	PGSC0003DMP400007249	94.4	7.6e-189
Soltu.Atl_v3.06_4G014950.1	Soltu.Atl_v3.06_4G014950			Dof	PF02701	Dof domain, zinc finger	6.9e-34	115.7	PGSC0003DMP400007249	94.4	7.6e-189
Soltu.Atl_v3.02_1G003720.4	Soltu.Atl_v3.02_1G003720			ARF	PF06507	Auxin response factor	7e-34	115.8	Solyc02g037530.2.1	96.7	0
Soltu.Atl_v3.02_1G003720.5	Soltu.Atl_v3.02_1G003720			ARF	PF06507	Auxin response factor	7e-34	115.8	Solyc02g037530.2.1	96.7	0
Soltu.Atl_v3.02_2G004760.4	Soltu.Atl_v3.02_2G004760			ARF	PF06507	Auxin response factor	6.9e-34	115.8	Solyc02g037530.2.1	96.3	0
Soltu.Atl_v3.01_1G022910.2	Soltu.Atl_v3.01_1G022910			Dof	PF02701	Dof domain, zinc finger	6.1e-34	115.8	PGSC0003DMP400000266	100	1.2e-197
Soltu.Atl_v3.01_2G027780.3	Soltu.Atl_v3.01_2G027780			Dof	PF02701	Dof domain, zinc finger	6.1e-34	115.8	PGSC0003DMP400000266	100	1.2e-197
Soltu.Atl_v3.01_3G021910.2	Soltu.Atl_v3.01_3G021910			Dof	PF02701	Dof domain, zinc finger	6.1e-34	115.8	PGSC0003DMP400000266	100	1.2e-197
MSTRG.23153.2	MSTRG.23153			ARF	PF06507	Auxin response factor	6.5e-34	115.9	PGSC0003DMP400032531	97.5	0
MSTRG.23153.3	MSTRG.23153			ARF	PF06507	Auxin response factor	6.5e-34	115.9	PGSC0003DMP400032531	97.5	0
MSTRG.23283.1	MSTRG.23283			ARF	PF06507	Auxin response factor	6.5e-34	115.9	PGSC0003DMP400032531	96.3	0
MSTRG.23283.3	MSTRG.23283			ARF	PF06507	Auxin response factor	6.5e-34	115.9	PGSC0003DMP400032531	96.3	0
Soltu.Atl_v3.02_3G004870.1	Soltu.Atl_v3.02_3G004870			ARF	PF06507	Auxin response factor	6.3e-34	115.9	PGSC0003DMP400032529	78.8	0
Soltu.Atl_v3.02_3G021700.1	Soltu.Atl_v3.02_3G021700			Dof	PF02701	Dof domain, zinc finger	6e-34	115.9	PGSC0003DMP400021675	94.3	5.9e-197
Soltu.Atl_v3.02_4G009530.3	Soltu.Atl_v3.02_4G009530			MYB	PF00249	Myb-like DNA-binding domain	5.8e-34	115.9	PGSC0003DMP400012271	95.5	6.63e-149
Soltu.Atl_v3.08_0G004420.1	Soltu.Atl_v3.08_0G004420			B3	PF02362	B3 DNA binding domain	5.8e-34	115.9	PGSC0003DMP400065826	43	5.11e-85
Soltu.Atl_v3.S101090.1	Soltu.Atl_v3.S101090			MYB	PF00249	Myb-like DNA-binding domain	5.7e-34	115.9	PGSC0003DMP400032077	94	1.3e-235
Soltu.Atl_v3.01_4G023040.1	Soltu.Atl_v3.01_4G023040			GRF	PF08879	WRC	4.1e-34	115.9	PGSC0003DMP400022619	98.3	0
Soltu.Atl_v3.S085200.4	Soltu.Atl_v3.S085200			C3H	PF00642	Zinc finger C-x8-C-x5-C-x3-H type (and similar)	3.6e-34	115.9	PGSC0003DMP400039261	99.1	2.14e-180
Soltu.Atl_v3.S085220.4	Soltu.Atl_v3.S085220			C3H	PF00642	Zinc finger C-x8-C-x5-C-x3-H type (and similar)	3.6e-34	115.9	PGSC0003DMP400039261	99.1	2.14e-180
Soltu.Atl_v3.01_2G018840.5	Soltu.Atl_v3.01_2G018840			C3H	PF00642	Zinc finger C-x8-C-x5-C-x3-H type (and similar)	3.5e-34	115.9	PGSC0003DMP400039261	96	6.12e-177
Soltu.Atl_v3.06_3G012900.1	Soltu.Atl_v3.06_3G012900			Dof	PF02701	Dof domain, zinc finger	5.6e-34	116	PGSC0003DMP400004435	50.5	9.38e-60
Soltu.Atl_v3.01_1G022910.3	Soltu.Atl_v3.01_1G022910			Dof	PF02701	Dof domain, zinc finger	5.4e-34	116	PGSC0003DMP400000266	100	4.06e-198
Soltu.Atl_v3.01_2G027780.2	Soltu.Atl_v3.01_2G027780			Dof	PF02701	Dof domain, zinc finger	5.4e-34	116	PGSC0003DMP400000266	100	4.06e-198
Soltu.Atl_v3.01_2G027780.4	Soltu.Atl_v3.01_2G027780			Dof	PF02701	Dof domain, zinc finger	5.4e-34	116	PGSC0003DMP400000266	100	4.06e-198
Soltu.Atl_v3.01_3G021910.1	Soltu.Atl_v3.01_3G021910			Dof	PF02701	Dof domain, zinc finger	5.4e-34	116	PGSC0003DMP400000266	100	4.06e-198
Soltu.Atl_v3.01_3G021910.3	Soltu.Atl_v3.01_3G021910			Dof	PF02701	Dof domain, zinc finger	5.4e-34	116	PGSC0003DMP400000266	100	4.06e-198
Soltu.Atl_v3.10_0G010210.1	Soltu.Atl_v3.10_0G010210			MYB	PF00249	Myb-like DNA-binding domain	5.3e-34	116	Solyc10g086290.1.1	77	5.97e-133
Soltu.Atl_v3.11_3G014610.3	Soltu.Atl_v3.11_3G014610			SRS	PF05142	Domain of unknown function (DUF702)	1.6e-33	116.1	PGSC0003DMP400016711	89.3	3.24e-77
MSTRG.10896.3	Soltu.Atl_v3.02_1G013940			ARF	PF06507	Auxin response factor	5.4e-34	116.1	PGSC0003DMP400054999	98.4	0
Soltu.Atl_v3.02_3G021700.2	Soltu.Atl_v3.02_3G021700			Dof	PF02701	Dof domain, zinc finger	5e-34	116.1	PGSC0003DMP400021675	94	2.98e-195
Soltu.Atl_v3.02_3G021700.3	Soltu.Atl_v3.02_3G021700			Dof	PF02701	Dof domain, zinc finger	5e-34	116.1	PGSC0003DMP400021675	94.3	5.63e-198
Soltu.Atl_v3.08_1G019150.1	Soltu.Atl_v3.08_1G019150			Dof	PF02701	Dof domain, zinc finger	5e-34	116.1	PGSC0003DMP400021675	93.4	1.41e-193
Soltu.Atl_v3.08_1G019150.2	Soltu.Atl_v3.08_1G019150			Dof	PF02701	Dof domain, zinc finger	5e-34	116.1	PGSC0003DMP400021675	93.7	2.67e-196
Soltu.Atl_v3.02_3G004870.3	Soltu.Atl_v3.02_3G004870			ARF	PF06507	Auxin response factor	5.1e-34	116.2	PGSC0003DMP400032530	77.5	4.07e-277
Soltu.Atl_v3.02_3G021700.4	Soltu.Atl_v3.02_3G021700			Dof	PF02701	Dof domain, zinc finger	4.6e-34	116.2	PGSC0003DMP400021675	94.7	2.1e-187
Soltu.Atl_v3.08_1G019150.3	Soltu.Atl_v3.08_1G019150			Dof	PF02701	Dof domain, zinc finger	4.6e-34	116.2	PGSC0003DMP400021675	94.1	9.93e-186
Soltu.Atl_v3.04_0G009500.1	Soltu.Atl_v3.04_0G009500			MYB	PF00249	Myb-like DNA-binding domain	4.5e-34	116.2	PGSC0003DMP400043024	91	2.15e-186
Soltu.Atl_v3.01_1G021470.1	Soltu.Atl_v3.01_1G021470			GRF	PF08879	WRC	3.3e-34	116.2	PGSC0003DMP400022619	99.3	3.01E-310
Soltu.Atl_v3.01_2G024570.1	Soltu.Atl_v3.01_2G024570			GRF	PF08879	WRC	3.3e-34	116.2	PGSC0003DMP400022619	100	6.3399999999983E-312
Soltu.Atl_v3.01_3G020090.1	Soltu.Atl_v3.01_3G020090			GRF	PF08879	WRC	3.3e-34	116.2	PGSC0003DMP400022619	99.3	3.01E-310
Soltu.Atl_v3.03_3G001680.1	Soltu.Atl_v3.03_3G001680			Dof	PF02701	Dof domain, zinc finger	4.5e-34	116.3	PGSC0003DMP400022708	95.5	2.05e-168
Soltu.Atl_v3.06_4G020680.1	Soltu.Atl_v3.06_4G020680			Dof	PF02701	Dof domain, zinc finger	4.2e-34	116.3	Solyc06g075370.2.1	96	6.45e-191
Soltu.Atl_v3.06_1G015120.1	Soltu.Atl_v3.06_1G015120			Dof	PF02701	Dof domain, zinc finger	4.2e-34	116.4	Solyc06g075370.2.1	94.7	6.45e-191
Soltu.Atl_v3.06_2G027310.1	Soltu.Atl_v3.06_2G027310			Dof	PF02701	Dof domain, zinc finger	4.2e-34	116.4	Solyc06g075370.2.1	94.7	6.45e-191
Soltu.Atl_v3.06_3G021010.1	Soltu.Atl_v3.06_3G021010			Dof	PF02701	Dof domain, zinc finger	4.2e-34	116.4	Solyc06g075370.2.1	94.7	6.45e-191
Soltu.Atl_v3.02_2G010070.2	Soltu.Atl_v3.02_2G010070			MYB	PF00249	Myb-like DNA-binding domain	4.1e-34	116.4	PGSC0003DMP400012271	88.6	1.55e-141
Soltu.Atl_v3.04_2G009720.1	Soltu.Atl_v3.04_2G009720			MYB	PF00249	Myb-like DNA-binding domain	3.9e-34	116.4	PGSC0003DMP400043024	87.4	5e-175
Soltu.Atl_v3.04_4G012840.1	Soltu.Atl_v3.04_4G012840			MYB	PF00249	Myb-like DNA-binding domain	3.9e-34	116.4	PGSC0003DMP400043024	87.4	5e-175
Soltu.Atl_v3.08_3G013510.1	Soltu.Atl_v3.08_3G013510			MYB	PF00249	Myb-like DNA-binding domain	3.9e-34	116.4	PGSC0003DMP400030609	98.8	6.96e-235
Soltu.Atl_v3.08_2G014440.1	Soltu.Atl_v3.08_2G014440			MYB	PF00249	Myb-like DNA-binding domain	3.7e-34	116.5	PGSC0003DMP400030609	100	4.38e-238
Soltu.Atl_v3.10_0G000700.1	Soltu.Atl_v3.10_0G000700			MYB	PF00249	Myb-like DNA-binding domain	3.7e-34	116.5	PGSC0003DMP400019896	96.7	7.1e-161
Soltu.Atl_v3.10_1G000670.1	Soltu.Atl_v3.10_1G000670			MYB	PF00249	Myb-like DNA-binding domain	3.6e-34	116.5	PGSC0003DMP400019896	96.7	2.48e-161
Soltu.Atl_v3.10_2G000680.1	Soltu.Atl_v3.10_2G000680			MYB	PF00249	Myb-like DNA-binding domain	3.6e-34	116.5	PGSC0003DMP400019896	98.3	4.47e-164
MSTRG.14913.4	Soltu.Atl_v3.02_3G009910			MYB	PF00249	Myb-like DNA-binding domain	3.4e-34	116.6	PGSC0003DMP400012270	98.9	1.58e-51
Soltu.Atl_v3.09_2G019300.1	Soltu.Atl_v3.09_2G019300			Nin-like	PF02042	RWP-RK domain	3.1e-34	116.6	PGSC0003DMP400051646	66.4	4.12e-107
Soltu.Atl_v3.09_3G023450.1	Soltu.Atl_v3.09_3G023450			Nin-like	PF02042	RWP-RK domain	3.1e-34	116.6	PGSC0003DMP400051646	66.4	4.12e-107
Soltu.Atl_v3.09_3G023450.2	Soltu.Atl_v3.09_3G023450			Nin-like	PF02042	RWP-RK domain	3e-34	116.6	PGSC0003DMP400051646	66.4	3.57e-107
Soltu.Atl_v3.02_1G007490.1	Soltu.Atl_v3.02_1G007490			Dof	PF02701	Dof domain, zinc finger	3.4e-34	116.7	PGSC0003DMP400017852	58.5	1.04e-64
Soltu.Atl_v3.02_2G008860.1	Soltu.Atl_v3.02_2G008860			Dof	PF02701	Dof domain, zinc finger	3.4e-34	116.7	PGSC0003DMP400017852	58.5	1.19e-63
Soltu.Atl_v3.02_4G008400.1	Soltu.Atl_v3.02_4G008400			Dof	PF02701	Dof domain, zinc finger	3.4e-34	116.7	PGSC0003DMP400017852	58.1	2.39e-63
Soltu.Atl_v3.02_3G008680.1	Soltu.Atl_v3.02_3G008680			Dof	PF02701	Dof domain, zinc finger	3.2e-34	116.7	PGSC0003DMP400017852	56.2	2e-64
Soltu.Atl_v3.08_2G020290.1	Soltu.Atl_v3.08_2G020290			Dof	PF02701	Dof domain, zinc finger	3.2e-34	116.7	PGSC0003DMP400021675	94.6	6.21e-193
Soltu.Atl_v3.08_2G020290.2	Soltu.Atl_v3.08_2G020290			Dof	PF02701	Dof domain, zinc finger	3.2e-34	116.7	PGSC0003DMP400021675	94.9	8.26e-196
Soltu.Atl_v3.10_0G000580.1	Soltu.Atl_v3.10_0G000580			MYB	PF00249	Myb-like DNA-binding domain	3.2e-34	116.7	PGSC0003DMP400019914	97.8	1.61e-221
Soltu.Atl_v3.10_1G000560.1	Soltu.Atl_v3.10_1G000560			MYB	PF00249	Myb-like DNA-binding domain	3.2e-34	116.7	PGSC0003DMP400019914	97.4	1.88e-220
Soltu.Atl_v3.02_1G028930.1	Soltu.Atl_v3.02_1G028930			MYB	PF00249	Myb-like DNA-binding domain	3.1e-34	116.7	PGSC0003DMP400002379	98	8.25e-212
Soltu.Atl_v3.08_2G020290.3	Soltu.Atl_v3.08_2G020290			Dof	PF02701	Dof domain, zinc finger	2.9e-34	116.9	PGSC0003DMP400021675	95	8.81e-185
MSTRG.15784.5	Soltu.Atl_v3.02_3G021700			Dof	PF02701	Dof domain, zinc finger	2.7e-34	117	PGSC0003DMP400021675	90.8	7.24e-99
Soltu.Atl_v3.04_2G008120.1	Soltu.Atl_v3.04_2G008120			MYB	PF00249	Myb-like DNA-binding domain	2.6e-34	117	PGSC0003DMP400066962	89.4	2.85e-81
Soltu.Atl_v3.04_3G009950.1	Soltu.Atl_v3.04_3G009950			MYB	PF00249	Myb-like DNA-binding domain	2.6e-34	117	PGSC0003DMP400066962	89.4	2.85e-81
Soltu.Atl_v3.02_3G031450.1	Soltu.Atl_v3.02_3G031450			MYB	PF00249	Myb-like DNA-binding domain	2.1e-34	117.3	PGSC0003DMP400002379	100	4.27e-216
Soltu.Atl_v3.02_4G023600.1	Soltu.Atl_v3.02_4G023600			MYB	PF00249	Myb-like DNA-binding domain	2.1e-34	117.3	PGSC0003DMP400002379	100	4.27e-216
Soltu.Atl_v3.06_1G012100.2	Soltu.Atl_v3.06_1G012100			C3H	PF00642	Zinc finger C-x8-C-x5-C-x3-H type (and similar)	1.2e-34	117.3	PGSC0003DMP400047011	100	3.84e-257
Soltu.Atl_v3.06_4G016590.2	Soltu.Atl_v3.06_4G016590			C3H	PF00642	Zinc finger C-x8-C-x5-C-x3-H type (and similar)	1.2e-34	117.3	PGSC0003DMP400047011	100	3.84e-257
Soltu.Atl_v3.11_1G018380.1	Soltu.Atl_v3.11_1G018380			LBD (AS2/LOB)	PF03195	Protein of unknown function DUF260	2.4e-34	117.5	PGSC0003DMP400044029	84.3	5.15e-113
Soltu.Atl_v3.02_1G030260.1	Soltu.Atl_v3.02_1G030260			MYB	PF00249	Myb-like DNA-binding domain	1.8e-34	117.5	PGSC0003DMP400000947	97.6	6.94e-135
Soltu.Atl_v3.09_2G008400.3	Soltu.Atl_v3.09_2G008400			WRKY	PF03106	WRKY DNA -binding domain	2e-34	117.6	PGSC0003DMP400020631	98	6.69e-282
Soltu.Atl_v3.09_3G007390.4	Soltu.Atl_v3.09_3G007390			WRKY	PF03106	WRKY DNA -binding domain	2e-34	117.6	PGSC0003DMP400020631	99.3	2.08e-281
Soltu.Atl_v3.08_0G011660.1	Soltu.Atl_v3.08_0G011660			AP2	PF00847	AP2 domain	1.9e-34	117.6	PGSC0003DMP400021524	98.7	0
Soltu.Atl_v3.09_1G003170.3	Soltu.Atl_v3.09_1G003170			WRKY	PF03106	WRKY DNA -binding domain	1.9e-34	117.7	PGSC0003DMP400020631	97	7.44e-267
Soltu.Atl_v3.02_3G032680.1	Soltu.Atl_v3.02_3G032680			MYB	PF00249	Myb-like DNA-binding domain	1.5e-34	117.8	PGSC0003DMP400000947	94.7	4.26e-133
Soltu.Atl_v3.06_0G005800.1	Soltu.Atl_v3.06_0G005800			HD-ZIP	PF01852	START domain	3.5e-34	117.9	PGSC0003DMP400029101	76.6	1.34e-271
MSTRG.36444.1	Soltu.Atl_v3.05_2G016870			ARF	PF06507	Auxin response factor	1.5e-34	117.9	PGSC0003DMP400024204	98	0
Soltu.Atl_v3.05_2G016870.1	Soltu.Atl_v3.05_2G016870			ARF	PF06507	Auxin response factor	1.5e-34	117.9	PGSC0003DMP400024204	98	0
Soltu.Atl_v3.05_3G018160.1	Soltu.Atl_v3.05_3G018160			ARF	PF06507	Auxin response factor	1.5e-34	117.9	PGSC0003DMP400024204	98.6	0
Soltu.Atl_v3.05_3G018160.2	Soltu.Atl_v3.05_3G018160			ARF	PF06507	Auxin response factor	1.5e-34	117.9	PGSC0003DMP400024204	98.5	0
Soltu.Atl_v3.05_3G018160.3	Soltu.Atl_v3.05_3G018160			ARF	PF06507	Auxin response factor	1.5e-34	117.9	PGSC0003DMP400024204	98.7	0
Soltu.Atl_v3.05_3G018160.6	Soltu.Atl_v3.05_3G018160			ARF	PF06507	Auxin response factor	1.5e-34	117.9	PGSC0003DMP400024204	98.8	0
Soltu.Atl_v3.05_4G017420.1	Soltu.Atl_v3.05_4G017420			ARF	PF06507	Auxin response factor	1.5e-34	117.9	PGSC0003DMP400024204	99	0
Soltu.Atl_v3.04_1G012370.1	Soltu.Atl_v3.04_1G012370			MYB	PF00249	Myb-like DNA-binding domain	1.4e-34	117.9	Solyc04g056310.2.1	83.8	8.4e-202
Soltu.Atl_v3.04_1G012570.1	Soltu.Atl_v3.04_1G012570			MYB	PF00249	Myb-like DNA-binding domain	1.4e-34	117.9	Solyc04g056310.2.1	83.8	8.4e-202
Soltu.Atl_v3.S006060.5	Soltu.Atl_v3.S006060			CAMTA	PF03859	CG-1 domain	1.7e-34	118	Sopen12g015500.3	94	0
Soltu.Atl_v3.S006060.6	Soltu.Atl_v3.S006060			CAMTA	PF03859	CG-1 domain	1.7e-34	118	Solyc12g035520.1.1	94	0
Soltu.Atl_v3.05_1G018200.1	Soltu.Atl_v3.05_1G018200			ARF	PF06507	Auxin response factor	1.5e-34	118	PGSC0003DMP400024204	99.5	0
Soltu.Atl_v3.05_1G018200.4	Soltu.Atl_v3.05_1G018200			ARF	PF06507	Auxin response factor	1.5e-34	118	PGSC0003DMP400024204	99.5	0
Soltu.Atl_v3.05_2G016870.2	Soltu.Atl_v3.05_2G016870			ARF	PF06507	Auxin response factor	1.5e-34	118	PGSC0003DMP400024204	98	0
Soltu.Atl_v3.05_4G017420.4	Soltu.Atl_v3.05_4G017420			ARF	PF06507	Auxin response factor	1.5e-34	118	PGSC0003DMP400024204	99	0
Soltu.Atl_v3.05_1G018200.2	Soltu.Atl_v3.05_1G018200			ARF	PF06507	Auxin response factor	1.4e-34	118	PGSC0003DMP400024204	99.6	0
Soltu.Atl_v3.05_2G016870.3	Soltu.Atl_v3.05_2G016870			ARF	PF06507	Auxin response factor	1.4e-34	118	PGSC0003DMP400024204	98	0
Soltu.Atl_v3.05_3G018160.4	Soltu.Atl_v3.05_3G018160			ARF	PF06507	Auxin response factor	1.4e-34	118	PGSC0003DMP400024204	98.8	0
Soltu.Atl_v3.05_4G017420.2	Soltu.Atl_v3.05_4G017420			ARF	PF06507	Auxin response factor	1.4e-34	118	PGSC0003DMP400024204	99.1	0
Soltu.Atl_v3.04_4G004570.1	Soltu.Atl_v3.04_4G004570			TCP	PF03634	TCP family transcription factor	4.7e-34	118.1	Solyc04g009180.1.1	97.2	2.43e-137
Soltu.Atl_v3.S000630.5	Soltu.Atl_v3.S000630			CAMTA	PF03859	CG-1 domain	1.6e-34	118.1	Sopen12g015500.3	93.7	0
Soltu.Atl_v3.S000630.6	Soltu.Atl_v3.S000630			CAMTA	PF03859	CG-1 domain	1.6e-34	118.1	Solyc12g035520.1.1	93.7	0
Soltu.Atl_v3.S000630.9	Soltu.Atl_v3.S000630			CAMTA	PF03859	CG-1 domain	1.6e-34	118.1	Solyc12g035520.1.1	93.7	0
MSTRG.39147.1	Soltu.Atl_v3.05_4G017420			ARF	PF06507	Auxin response factor	1.4e-34	118.1	PGSC0003DMP400024204	98.9	0
Soltu.Atl_v3.05_1G018200.5	Soltu.Atl_v3.05_1G018200			ARF	PF06507	Auxin response factor	1.4e-34	118.1	PGSC0003DMP400024204	99.5	0
Soltu.Atl_v3.05_2G016870.4	Soltu.Atl_v3.05_2G016870			ARF	PF06507	Auxin response factor	1.4e-34	118.1	PGSC0003DMP400024204	98	0
Soltu.Atl_v3.05_2G016870.5	Soltu.Atl_v3.05_2G016870			ARF	PF06507	Auxin response factor	1.4e-34	118.1	PGSC0003DMP400024204	98	0
Soltu.Atl_v3.05_3G018160.5	Soltu.Atl_v3.05_3G018160			ARF	PF06507	Auxin response factor	1.4e-34	118.1	PGSC0003DMP400024204	98.8	0
Soltu.Atl_v3.05_3G018160.7	Soltu.Atl_v3.05_3G018160			ARF	PF06507	Auxin response factor	1.4e-34	118.1	PGSC0003DMP400024204	98.8	0
Soltu.Atl_v3.05_4G017420.3	Soltu.Atl_v3.05_4G017420			ARF	PF06507	Auxin response factor	1.4e-34	118.1	PGSC0003DMP400024204	99	0
Soltu.Atl_v3.05_4G017420.5	Soltu.Atl_v3.05_4G017420			ARF	PF06507	Auxin response factor	1.4e-34	118.1	PGSC0003DMP400024204	99	0
MSTRG.36444.7	Soltu.Atl_v3.05_2G016870			ARF	PF06507	Auxin response factor	1.3e-34	118.1	PGSC0003DMP400024204	97.8	0
Soltu.Atl_v3.05_1G018200.3	Soltu.Atl_v3.05_1G018200			ARF	PF06507	Auxin response factor	1.3e-34	118.1	PGSC0003DMP400024204	99.6	0
Soltu.Atl_v3.05_2G004190.1	Soltu.Atl_v3.05_2G004190			MYB	PF00249	Myb-like DNA-binding domain	1.1e-34	118.2	PGSC0003DMP400053171	98.9	2.43e-131
Soltu.Atl_v3.05_3G004580.1	Soltu.Atl_v3.05_3G004580			MYB	PF00249	Myb-like DNA-binding domain	1.1e-34	118.2	PGSC0003DMP400053171	98.9	2.43e-131
Soltu.Atl_v3.08_4G016380.1	Soltu.Atl_v3.08_4G016380			MYB	PF00249	Myb-like DNA-binding domain	1e-34	118.3	PGSC0003DMP400030610	84.4	4.29e-168
Soltu.Atl_v3.01_2G004210.1	Soltu.Atl_v3.01_2G004210			TCP	PF03634	TCP family transcription factor	3.8e-34	118.4	PGSC0003DMP400028586	99.6	6.37e-172
Soltu.Atl_v3.04_1G005680.1	Soltu.Atl_v3.04_1G005680			TCP	PF03634	TCP family transcription factor	3.8e-34	118.4	Solyc04g009180.1.1	97.4	9.31e-150
Soltu.Atl_v3.04_1G021430.1	Soltu.Atl_v3.04_1G021430			ARF	PF06507	Auxin response factor	1e-34	118.4	PGSC0003DMP400006736	99	0
Soltu.Atl_v3.S073890.1	Soltu.Atl_v3.S073890			MYB	PF00249	Myb-like DNA-binding domain	9.3e-35	118.4	PGSC0003DMP400038822	99.6	2.68e-198
MSTRG.30965.1	Soltu.Atl_v3.04_3G004520			TCP	PF03634	TCP family transcription factor	3.5e-34	118.5	Solyc04g009180.1.1	96.3	1.36e-146
Soltu.Atl_v3.04_2G004350.1	Soltu.Atl_v3.04_2G004350			TCP	PF03634	TCP family transcription factor	3.5e-34	118.5	Solyc04g009180.1.1	95.9	2.16e-145
Soltu.Atl_v3.04_2G004350.2	Soltu.Atl_v3.04_2G004350			TCP	PF03634	TCP family transcription factor	3.5e-34	118.5	Solyc04g009180.1.1	95.9	2.16e-145
Soltu.Atl_v3.04_2G004350.3	Soltu.Atl_v3.04_2G004350			TCP	PF03634	TCP family transcription factor	3.5e-34	118.5	Solyc04g009180.1.1	95.9	2.16e-145
Soltu.Atl_v3.04_3G004510.1	Soltu.Atl_v3.04_3G004510			TCP	PF03634	TCP family transcription factor	3.5e-34	118.5	Solyc04g009180.1.1	96.3	1.36e-146
Soltu.Atl_v3.04_4G021770.1	Soltu.Atl_v3.04_4G021770			ARF	PF06507	Auxin response factor	1e-34	118.5	PGSC0003DMP400006736	98.3	0
Soltu.Atl_v3.04_2G019980.1	Soltu.Atl_v3.04_2G019980			ARF	PF06507	Auxin response factor	9.7e-35	118.5	PGSC0003DMP400006736	100	0
Soltu.Atl_v3.04_3G021460.1	Soltu.Atl_v3.04_3G021460			ARF	PF06507	Auxin response factor	9.7e-35	118.5	PGSC0003DMP400006736	100	0
Soltu.Atl_v3.04_1G021430.3	Soltu.Atl_v3.04_1G021430			ARF	PF06507	Auxin response factor	9.6e-35	118.5	PGSC0003DMP400006736	98.9	0
Soltu.Atl_v3.02_2G030880.1	Soltu.Atl_v3.02_2G030880			MYB	PF00249	Myb-like DNA-binding domain	8.7e-35	118.5	PGSC0003DMP400002480	94.7	9.09e-161
Soltu.Atl_v3.04_1G021430.2	Soltu.Atl_v3.04_1G021430			ARF	PF06507	Auxin response factor	9.6e-35	118.6	PGSC0003DMP400006736	99.1	0
Soltu.Atl_v3.04_4G021770.2	Soltu.Atl_v3.04_4G021770			ARF	PF06507	Auxin response factor	9.5e-35	118.6	PGSC0003DMP400006736	98.2	0
Soltu.Atl_v3.04_4G021770.4	Soltu.Atl_v3.04_4G021770			ARF	PF06507	Auxin response factor	9.5e-35	118.6	PGSC0003DMP400006736	98	0
Soltu.Atl_v3.04_2G019980.2	Soltu.Atl_v3.04_2G019980			ARF	PF06507	Auxin response factor	8.9e-35	118.6	PGSC0003DMP400006736	100	0
Soltu.Atl_v3.04_3G021460.2	Soltu.Atl_v3.04_3G021460			ARF	PF06507	Auxin response factor	8.9e-35	118.6	PGSC0003DMP400006736	100	0
Soltu.Atl_v3.02_1G027730.1	Soltu.Atl_v3.02_1G027730			MYB	PF00249	Myb-like DNA-binding domain	8e-35	118.6	PGSC0003DMP400002480	94.6	1.67e-155
Soltu.Atl_v3.04_2G019980.3	Soltu.Atl_v3.04_2G019980			ARF	PF06507	Auxin response factor	8.9e-35	118.7	PGSC0003DMP400006736	100	0
Soltu.Atl_v3.04_3G021460.3	Soltu.Atl_v3.04_3G021460			ARF	PF06507	Auxin response factor	8.9e-35	118.7	PGSC0003DMP400006736	100	0
Soltu.Atl_v3.04_4G021770.3	Soltu.Atl_v3.04_4G021770			ARF	PF06507	Auxin response factor	8.9e-35	118.7	PGSC0003DMP400006736	98.1	0
Soltu.Atl_v3.04_4G021770.6	Soltu.Atl_v3.04_4G021770			ARF	PF06507	Auxin response factor	8.9e-35	118.7	PGSC0003DMP400006736	98.1	0
Soltu.Atl_v3.04_2G019980.4	Soltu.Atl_v3.04_2G019980			ARF	PF06507	Auxin response factor	8.4e-35	118.7	PGSC0003DMP400006736	99.8	0
Soltu.Atl_v3.04_3G021460.4	Soltu.Atl_v3.04_3G021460			ARF	PF06507	Auxin response factor	8.4e-35	118.7	PGSC0003DMP400006736	99.8	0
Soltu.Atl_v3.08_4G016390.1	Soltu.Atl_v3.08_4G016390			MYB	PF00249	Myb-like DNA-binding domain	7.6e-35	118.7	PGSC0003DMP400030609	96.6	5.48e-230
Soltu.Atl_v3.04_4G019880.1	Soltu.Atl_v3.04_4G019880			B3	PF02362	B3 DNA binding domain	7.4e-35	118.7	Solyc04g079590.2.1	79.5	8.62e-218
Soltu.Atl_v3.04_4G019900.2	Soltu.Atl_v3.04_4G019900			B3	PF02362	B3 DNA binding domain	7.1e-35	118.8	Solyc04g079590.2.1	94.5	2.51e-292
Soltu.Atl_v3.04_4G019900.3	Soltu.Atl_v3.04_4G019900			B3	PF02362	B3 DNA binding domain	7.1e-35	118.8	Solyc04g079590.2.1	94.5	2.51e-292
Soltu.Atl_v3.04_4G019900.6	Soltu.Atl_v3.04_4G019900			B3	PF02362	B3 DNA binding domain	7.1e-35	118.8	Solyc04g079590.2.1	94.5	2.51e-292
MSTRG.30495.4	Soltu.Atl_v3.04_2G019980			ARF	PF06507	Auxin response factor	7.5e-35	118.9	PGSC0003DMP400006736	100	3.74e-166
Soltu.Atl_v3.07_2G004920.1	Soltu.Atl_v3.07_2G004920			ARF	PF06507	Auxin response factor	7.3e-35	118.9	PGSC0003DMP400017257	96.5	0
Soltu.Atl_v3.07_3G004510.1	Soltu.Atl_v3.07_3G004510			ARF	PF06507	Auxin response factor	7.3e-35	118.9	PGSC0003DMP400017257	97.3	0
Soltu.Atl_v3.07_4G004070.5	Soltu.Atl_v3.07_4G004070			ARF	PF06507	Auxin response factor	7.3e-35	118.9	PGSC0003DMP400017257	97.8	0
Soltu.Atl_v3.07_1G004490.1	Soltu.Atl_v3.07_1G004490			ARF	PF06507	Auxin response factor	7.2e-35	118.9	PGSC0003DMP400017257	96.1	0
Soltu.Atl_v3.07_3G004510.4	Soltu.Atl_v3.07_3G004510			ARF	PF06507	Auxin response factor	7.2e-35	118.9	PGSC0003DMP400017257	97.2	0
Soltu.Atl_v3.07_4G004070.1	Soltu.Atl_v3.07_4G004070			ARF	PF06507	Auxin response factor	7.2e-35	118.9	PGSC0003DMP400017257	97.8	0
Soltu.Atl_v3.04_2G017970.6	Soltu.Atl_v3.04_2G017970			B3	PF02362	B3 DNA binding domain	6.7e-35	118.9	Solyc04g079590.2.1	93.9	1.12e-292
Soltu.Atl_v3.04_3G019500.6	Soltu.Atl_v3.04_3G019500			B3	PF02362	B3 DNA binding domain	6.7e-35	118.9	Solyc04g079590.2.1	93.9	1.12e-292
Soltu.Atl_v3.10_3G005300.1	Soltu.Atl_v3.10_3G005300			MYB	PF00249	Myb-like DNA-binding domain	6.6e-35	118.9	PGSC0003DMP400023376	100	5.56e-202
Soltu.Atl_v3.04_2G017970.7	Soltu.Atl_v3.04_2G017970			B3	PF02362	B3 DNA binding domain	6.5e-35	118.9	Solyc04g079590.2.1	95	2.36e-295
Soltu.Atl_v3.04_3G019500.7	Soltu.Atl_v3.04_3G019500			B3	PF02362	B3 DNA binding domain	6.5e-35	118.9	Solyc04g079590.2.1	95	2.36e-295
Soltu.Atl_v3.02_2G033410.1	Soltu.Atl_v3.02_2G033410			MYB	PF00249	Myb-like DNA-binding domain	6.4e-35	118.9	PGSC0003DMP400000947	95.3	1.24e-100
Soltu.Atl_v3.12_2G002490.4	Soltu.Atl_v3.12_2G002490			CAMTA	PF03859	CG-1 domain	8.3e-35	119	Sopen12g034010.1	90.2	0
Soltu.Atl_v3.12_2G001930.5	Soltu.Atl_v3.12_2G001930			CAMTA	PF03859	CG-1 domain	8e-35	119	Sopen12g034010.1	95.4	0
Soltu.Atl_v3.12_2G002490.3	Soltu.Atl_v3.12_2G002490			CAMTA	PF03859	CG-1 domain	8e-35	119	Sopen12g034010.1	96.2	0
Soltu.Atl_v3.07_4G004070.3	Soltu.Atl_v3.07_4G004070			ARF	PF06507	Auxin response factor	7.1e-35	119	PGSC0003DMP400017257	97.8	0
Soltu.Atl_v3.07_3G004510.2	Soltu.Atl_v3.07_3G004510			ARF	PF06507	Auxin response factor	7e-35	119	PGSC0003DMP400017257	97.5	0
Soltu.Atl_v3.07_1G004490.2	Soltu.Atl_v3.07_1G004490			ARF	PF06507	Auxin response factor	6.9e-35	119	PGSC0003DMP400017257	96.3	0
Soltu.Atl_v3.07_4G004070.2	Soltu.Atl_v3.07_4G004070			ARF	PF06507	Auxin response factor	6.9e-35	119	PGSC0003DMP400017257	97.9	0
Soltu.Atl_v3.07_4G004070.4	Soltu.Atl_v3.07_4G004070			ARF	PF06507	Auxin response factor	6.8e-35	119	PGSC0003DMP400017257	97.8	0
Soltu.Atl_v3.02_4G024830.1	Soltu.Atl_v3.02_4G024830			MYB	PF00249	Myb-like DNA-binding domain	6.3e-35	119	PGSC0003DMP400000947	96	4.33e-101
Soltu.Atl_v3.06_3G011090.1	Soltu.Atl_v3.06_3G011090			MYB	PF00249	Myb-like DNA-binding domain	5.9e-35	119	PGSC0003DMP400054558	97.9	3.9e-202
Soltu.Atl_v3.06_4G012400.1	Soltu.Atl_v3.06_4G012400			MYB	PF00249	Myb-like DNA-binding domain	5.9e-35	119	PGSC0003DMP400054558	97.6	1.3e-200
MSTRG.51434.2	Soltu.Atl_v3.07_4G004070			ARF	PF06507	Auxin response factor	6.6e-35	119.1	PGSC0003DMP400017257	97.9	2.24e-57
Soltu.Atl_v3.07_4G004070.6	Soltu.Atl_v3.07_4G004070			ARF	PF06507	Auxin response factor	6.6e-35	119.1	PGSC0003DMP400017257	97.9	0
Soltu.Atl_v3.07_2G004920.2	Soltu.Atl_v3.07_2G004920			ARF	PF06507	Auxin response factor	6.5e-35	119.1	PGSC0003DMP400017257	96.7	0
Soltu.Atl_v3.07_3G004510.3	Soltu.Atl_v3.07_3G004510			ARF	PF06507	Auxin response factor	6.5e-35	119.1	PGSC0003DMP400017257	97.5	0
Soltu.Atl_v3.07_3G004510.5	Soltu.Atl_v3.07_3G004510			ARF	PF06507	Auxin response factor	6.3e-35	119.1	PGSC0003DMP400017257	97.1	0
Soltu.Atl_v3.07_3G004510.6	Soltu.Atl_v3.07_3G004510			ARF	PF06507	Auxin response factor	6.3e-35	119.1	PGSC0003DMP400017257	97.1	0
Soltu.Atl_v3.07_4G011550.3	Soltu.Atl_v3.07_4G011550			ARF	PF06507	Auxin response factor	6.3e-35	119.1	PGSC0003DMP400027884	94	0
Soltu.Atl_v3.06_1G007710.2	Soltu.Atl_v3.06_1G007710			MYB	PF00249	Myb-like DNA-binding domain	5.9e-35	119.1	PGSC0003DMP400054558	96.5	7.46e-195
Soltu.Atl_v3.02_4G023400.1	Soltu.Atl_v3.02_4G023400			MYB	PF00249	Myb-like DNA-binding domain	5.8e-35	119.1	PGSC0003DMP400002398	99.5	3.72e-298
Soltu.Atl_v3.06_2G016820.1	Soltu.Atl_v3.06_2G016820			MYB	PF00249	Myb-like DNA-binding domain	5.7e-35	119.1	PGSC0003DMP400054558	95.8	3.57e-194
MSTRG.51434.1	Soltu.Atl_v3.07_4G004070			ARF	PF06507	Auxin response factor	6.2e-35	119.2	PGSC0003DMP400017257	98	6.45e-129
Soltu.Atl_v3.07_0G007460.5	Soltu.Atl_v3.07_0G007460			ARF	PF06507	Auxin response factor	6.2e-35	119.2	PGSC0003DMP400027884	94	0
Soltu.Atl_v3.07_1G004490.3	Soltu.Atl_v3.07_1G004490			ARF	PF06507	Auxin response factor	6.2e-35	119.2	PGSC0003DMP400017257	95.9	0
Soltu.Atl_v3.07_4G004070.7	Soltu.Atl_v3.07_4G004070			ARF	PF06507	Auxin response factor	6.2e-35	119.2	PGSC0003DMP400017257	97.9	0
Soltu.Atl_v3.S125080.3	Soltu.Atl_v3.S125080			ARF	PF06507	Auxin response factor	6.2e-35	119.2	PGSC0003DMP400027884	94	0
Soltu.Atl_v3.S126370.3	Soltu.Atl_v3.S126370			ARF	PF06507	Auxin response factor	6.2e-35	119.2	PGSC0003DMP400027884	94	0
Soltu.Atl_v3.10_1G003290.1	Soltu.Atl_v3.10_1G003290			MYB	PF00249	Myb-like DNA-binding domain	5.4e-35	119.2	PGSC0003DMP400046268	98.8	6.11e-230
Soltu.Atl_v3.10_2G003890.1	Soltu.Atl_v3.10_2G003890			MYB	PF00249	Myb-like DNA-binding domain	5.4e-35	119.2	PGSC0003DMP400046268	99.7	1.56e-230
Soltu.Atl_v3.07_1G012240.1	Soltu.Atl_v3.07_1G012240			MYB	PF00249	Myb-like DNA-binding domain	5.3e-35	119.2	PGSC0003DMP400031943	96.1	6.9e-231
Soltu.Atl_v3.07_2G011860.1	Soltu.Atl_v3.07_2G011860			MYB	PF00249	Myb-like DNA-binding domain	5.3e-35	119.2	PGSC0003DMP400031943	99.4	1.25e-233
Soltu.Atl_v3.07_3G015290.1	Soltu.Atl_v3.07_3G015290			MYB	PF00249	Myb-like DNA-binding domain	5.3e-35	119.2	PGSC0003DMP400031943	96.1	6.9e-231
Soltu.Atl_v3.07_4G016370.1	Soltu.Atl_v3.07_4G016370			MYB	PF00249	Myb-like DNA-binding domain	5.3e-35	119.2	PGSC0003DMP400031943	96.4	2.93e-232
Soltu.Atl_v3.10_3G002380.1	Soltu.Atl_v3.10_3G002380			MYB	PF00249	Myb-like DNA-binding domain	5.3e-35	119.2	PGSC0003DMP400046268	96.4	6.29e-227
Soltu.Atl_v3.10_4G002460.1	Soltu.Atl_v3.10_4G002460			MYB	PF00249	Myb-like DNA-binding domain	5.3e-35	119.2	PGSC0003DMP400046268	98.2	8.28e-226
MSTRG.51837.1	Soltu.Atl_v3.07_4G011550			ARF	PF06507	Auxin response factor	5.7e-35	119.3	PGSC0003DMP400027884	99.4	0
Soltu.Atl_v3.07_0G007460.1	Soltu.Atl_v3.07_0G007460			ARF	PF06507	Auxin response factor	5.7e-35	119.3	PGSC0003DMP400027884	99.4	0
Soltu.Atl_v3.07_0G007460.2	Soltu.Atl_v3.07_0G007460			ARF	PF06507	Auxin response factor	5.7e-35	119.3	PGSC0003DMP400027884	99.6	0
Soltu.Atl_v3.07_4G011550.1	Soltu.Atl_v3.07_4G011550			ARF	PF06507	Auxin response factor	5.7e-35	119.3	PGSC0003DMP400027884	99.6	0
Soltu.Atl_v3.S125080.1	Soltu.Atl_v3.S125080			ARF	PF06507	Auxin response factor	5.7e-35	119.3	PGSC0003DMP400027884	99.6	0
Soltu.Atl_v3.S126370.1	Soltu.Atl_v3.S126370			ARF	PF06507	Auxin response factor	5.7e-35	119.3	PGSC0003DMP400027884	99.6	0
Soltu.Atl_v3.02_4G022360.1	Soltu.Atl_v3.02_4G022360			MYB	PF00249	Myb-like DNA-binding domain	5.1e-35	119.3	PGSC0003DMP400002480	100	2.71e-169
Soltu.Atl_v3.02_1G009400.1	Soltu.Atl_v3.02_1G009400			MYB	PF00249	Myb-like DNA-binding domain	4.8e-35	119.3	Solyc02g067760.2.1	97.9	1.81e-139
Soltu.Atl_v3.02_3G010470.1	Soltu.Atl_v3.02_3G010470			MYB	PF00249	Myb-like DNA-binding domain	4.8e-35	119.3	Solyc02g067760.2.1	97.9	1.81e-139
Soltu.Atl_v3.02_4G010140.1	Soltu.Atl_v3.02_4G010140			MYB	PF00249	Myb-like DNA-binding domain	4.8e-35	119.3	Solyc02g067760.2.1	97.9	1.27e-139
Soltu.Atl_v3.02_2G010670.1	Soltu.Atl_v3.02_2G010670			MYB	PF00249	Myb-like DNA-binding domain	4.7e-35	119.3	Solyc02g067760.2.1	96.9	2.47e-137
Soltu.Atl_v3.07_0G007460.3	Soltu.Atl_v3.07_0G007460			ARF	PF06507	Auxin response factor	5.2e-35	119.4	PGSC0003DMP400027884	99.5	0
Soltu.Atl_v3.07_4G011550.4	Soltu.Atl_v3.07_4G011550			ARF	PF06507	Auxin response factor	5.2e-35	119.4	PGSC0003DMP400027884	99.5	0
Soltu.Atl_v3.07_0G007460.6	Soltu.Atl_v3.07_0G007460			ARF	PF06507	Auxin response factor	5.1e-35	119.4	PGSC0003DMP400027884	99.6	0
Soltu.Atl_v3.07_0G007460.7	Soltu.Atl_v3.07_0G007460			ARF	PF06507	Auxin response factor	5.1e-35	119.4	PGSC0003DMP400027884	99.6	0
Soltu.Atl_v3.S125080.4	Soltu.Atl_v3.S125080			ARF	PF06507	Auxin response factor	5.1e-35	119.4	PGSC0003DMP400027884	99.6	0
Soltu.Atl_v3.S125080.5	Soltu.Atl_v3.S125080			ARF	PF06507	Auxin response factor	5.1e-35	119.4	PGSC0003DMP400027884	99.6	0
Soltu.Atl_v3.S126370.4	Soltu.Atl_v3.S126370			ARF	PF06507	Auxin response factor	5.1e-35	119.4	PGSC0003DMP400027884	99.6	0
Soltu.Atl_v3.S126370.5	Soltu.Atl_v3.S126370			ARF	PF06507	Auxin response factor	5.1e-35	119.4	PGSC0003DMP400027884	99.6	0
Soltu.Atl_v3.05_0G001400.1	Soltu.Atl_v3.05_0G001400			MYB	PF00249	Myb-like DNA-binding domain	4.7e-35	119.4	PGSC0003DMP400053171	98.9	2.43e-131
Soltu.Atl_v3.05_4G004450.1	Soltu.Atl_v3.05_4G004450			MYB	PF00249	Myb-like DNA-binding domain	4.7e-35	119.4	PGSC0003DMP400053171	98.9	2.43e-131
Soltu.Atl_v3.02_2G030180.1	Soltu.Atl_v3.02_2G030180			MYB	PF00249	Myb-like DNA-binding domain	4.5e-35	119.4	PGSC0003DMP400002480	87.8	3.65e-155
Soltu.Atl_v3.07_4G011550.2	Soltu.Atl_v3.07_4G011550			ARF	PF06507	Auxin response factor	4.7e-35	119.5	PGSC0003DMP400027884	99.7	0
Soltu.Atl_v3.06_2G007640.1	Soltu.Atl_v3.06_2G007640			HD-ZIP	PF01852	START domain	1.1e-34	119.6	PGSC0003DMP400029101	76.9	4.92e-274
Soltu.Atl_v3.07_0G007460.4	Soltu.Atl_v3.07_0G007460			ARF	PF06507	Auxin response factor	4.7e-35	119.6	PGSC0003DMP400027884	99.5	0
Soltu.Atl_v3.07_0G007460.8	Soltu.Atl_v3.07_0G007460			ARF	PF06507	Auxin response factor	4.7e-35	119.6	PGSC0003DMP400027884	99.5	0
Soltu.Atl_v3.S125080.2	Soltu.Atl_v3.S125080			ARF	PF06507	Auxin response factor	4.7e-35	119.6	PGSC0003DMP400027884	99.5	0
Soltu.Atl_v3.S126370.2	Soltu.Atl_v3.S126370			ARF	PF06507	Auxin response factor	4.7e-35	119.6	PGSC0003DMP400027884	99.5	0
Soltu.Atl_v3.06_1G007710.1	Soltu.Atl_v3.06_1G007710			MYB	PF00249	Myb-like DNA-binding domain	4e-35	119.6	PGSC0003DMP400054558	86.3	1.46e-167
Soltu.Atl_v3.11_4G019710.2	Soltu.Atl_v3.11_4G019710			Whirly	PF08536	Whirly transcription factor	6.6e-35	119.7	PGSC0003DMP400039763	74.1	1.91e-61
Soltu.Atl_v3.02_0G004110.1	Soltu.Atl_v3.02_0G004110			MYB	PF00249	Myb-like DNA-binding domain	3.6e-35	119.7	PGSC0003DMP400002398	100	9.14e-299
Soltu.Atl_v3.02_1G028690.1	Soltu.Atl_v3.02_1G028690			MYB	PF00249	Myb-like DNA-binding domain	3.6e-35	119.7	PGSC0003DMP400002398	99.8	5.28e-298
Soltu.Atl_v3.02_2G031870.1	Soltu.Atl_v3.02_2G031870			MYB	PF00249	Myb-like DNA-binding domain	3.6e-35	119.7	PGSC0003DMP400002398	99.3	1.45e-295
Soltu.Atl_v3.11_3G020970.1	Soltu.Atl_v3.11_3G020970			LBD (AS2/LOB)	PF03195	Protein of unknown function DUF260	4.7e-35	119.8	PGSC0003DMP400044029	97.7	1.04e-89
Soltu.Atl_v3.01_0G019310.1	Soltu.Atl_v3.01_0G019310			MYB	PF00249	Myb-like DNA-binding domain	3.5e-35	119.8	PGSC0003DMP400010956	98.8	8.85e-192
Soltu.Atl_v3.01_0G019560.1	Soltu.Atl_v3.01_0G019560			MYB	PF00249	Myb-like DNA-binding domain	3.5e-35	119.8	PGSC0003DMP400010956	98.8	8.85e-192
Soltu.Atl_v3.01_0G019810.1	Soltu.Atl_v3.01_0G019810			MYB	PF00249	Myb-like DNA-binding domain	3.5e-35	119.8	PGSC0003DMP400010956	98.8	8.85e-192
MSTRG.28825.4	Soltu.Atl_v3.04_1G019280			B3	PF02362	B3 DNA binding domain	3.4e-35	119.8	Sopim04g079590.0.1	94.7	2.74e-294
Soltu.Atl_v3.01_3G036240.1	Soltu.Atl_v3.01_3G036240			MYB	PF00249	Myb-like DNA-binding domain	3.4e-35	119.8	PGSC0003DMP400010956	99.6	1.31e-193
Soltu.Atl_v3.05_1G020420.1	Soltu.Atl_v3.05_1G020420			MYB	PF00249	Myb-like DNA-binding domain	3.4e-35	119.8	Solyc05g051550.1.1	91.1	3.15e-232
Soltu.Atl_v3.05_3G020270.1	Soltu.Atl_v3.05_3G020270			MYB	PF00249	Myb-like DNA-binding domain	3.4e-35	119.8	Sopen05g030000.1	93.9	4.41e-227
Soltu.Atl_v3.S005810.1	Soltu.Atl_v3.S005810			MYB	PF00249	Myb-like DNA-binding domain	3.4e-35	119.8	PGSC0003DMP400023376	99.6	1.59e-201
MSTRG.15569.2	Soltu.Atl_v3.02_3G019090			MYB	PF00249	Myb-like DNA-binding domain	3.2e-35	119.9	PGSC0003DMP400038822	99.2	4.78e-268
Soltu.Atl_v3.02_1G015640.1	Soltu.Atl_v3.02_1G015640			MYB	PF00249	Myb-like DNA-binding domain	3.2e-35	119.9	PGSC0003DMP400038822	99.5	4.09e-269
Soltu.Atl_v3.02_2G018610.1	Soltu.Atl_v3.02_2G018610			MYB	PF00249	Myb-like DNA-binding domain	3.2e-35	119.9	PGSC0003DMP400038822	97	2.97e-264
Soltu.Atl_v3.02_3G019090.1	Soltu.Atl_v3.02_3G019090			MYB	PF00249	Myb-like DNA-binding domain	3.2e-35	119.9	PGSC0003DMP400038822	99.2	4.78e-268
Soltu.Atl_v3.02_4G016430.1	Soltu.Atl_v3.02_4G016430			MYB	PF00249	Myb-like DNA-binding domain	3.2e-35	119.9	PGSC0003DMP400038822	99.5	4.09e-269
Soltu.Atl_v3.05_2G019310.1	Soltu.Atl_v3.05_2G019310			MYB	PF00249	Myb-like DNA-binding domain	3.2e-35	119.9	Solyc05g051550.1.1	91.9	1.1e-235
Soltu.Atl_v3.S073870.1	Soltu.Atl_v3.S073870			MYB	PF00249	Myb-like DNA-binding domain	3.2e-35	119.9	PGSC0003DMP400038822	99.7	2.03e-269
MSTRG.77561.7	Soltu.Atl_v3.12_3G001640			CAMTA	PF03859	CG-1 domain	3.9e-35	120	Sopen12g034010.1	95.5	0
Soltu.Atl_v3.12_3G001640.7	Soltu.Atl_v3.12_3G001640			CAMTA	PF03859	CG-1 domain	3.9e-35	120	Sopen12g034010.1	95.6	0
Soltu.Atl_v3.05_4G019470.1	Soltu.Atl_v3.05_4G019470			MYB	PF00249	Myb-like DNA-binding domain	3.1e-35	120	Solyc05g051550.1.1	91.6	3.64e-231
Soltu.Atl_v3.11_1G011610.6	Soltu.Atl_v3.11_1G011610			Whirly	PF08536	Whirly transcription factor	5.3e-35	120.1	PGSC0003DMP400039763	93.4	1.47e-96
Soltu.Atl_v3.11_1G011610.7	Soltu.Atl_v3.11_1G011610			Whirly	PF08536	Whirly transcription factor	5.3e-35	120.1	PGSC0003DMP400039763	93.4	1.47e-96
Soltu.Atl_v3.11_2G006870.8	Soltu.Atl_v3.11_2G006870			Whirly	PF08536	Whirly transcription factor	5.2e-35	120.1	PGSC0003DMP400039763	94	2.1e-98
Soltu.Atl_v3.11_4G013240.8	Soltu.Atl_v3.11_4G013240			Whirly	PF08536	Whirly transcription factor	5.2e-35	120.1	PGSC0003DMP400039763	94	2.1e-98
Soltu.Atl_v3.11_3G012950.5	Soltu.Atl_v3.11_3G012950			Whirly	PF08536	Whirly transcription factor	5.1e-35	120.1	PGSC0003DMP400039763	94	2.1e-98
Soltu.Atl_v3.04_4G014810.1	Soltu.Atl_v3.04_4G014810			MYB	PF00249	Myb-like DNA-binding domain	2.7e-35	120.1	PGSC0003DMP400011365	100	9.27e-246
MSTRG.83336.2	Soltu.Atl_v3.S073890			MYB	PF00249	Myb-like DNA-binding domain	2.6e-35	120.2	PGSC0003DMP400038822	99.4	3.65e-244
Soltu.Atl_v3.08_0G004430.1	Soltu.Atl_v3.08_0G004430			B3	PF02362	B3 DNA binding domain	2.2e-35	120.4	PGSC0003DMP400065826	82.3	6.19e-208
Soltu.Atl_v3.05_1G023810.1	Soltu.Atl_v3.05_1G023810			MYB	PF00249	Myb-like DNA-binding domain	2e-35	120.5	PGSC0003DMP400040480	100	6.38e-150
Soltu.Atl_v3.05_2G023600.1	Soltu.Atl_v3.05_2G023600			MYB	PF00249	Myb-like DNA-binding domain	2e-35	120.5	PGSC0003DMP400040480	98.2	4.31e-148
Soltu.Atl_v3.05_3G023680.1	Soltu.Atl_v3.05_3G023680			MYB	PF00249	Myb-like DNA-binding domain	2e-35	120.5	PGSC0003DMP400040480	98.2	1.44e-146
Soltu.Atl_v3.05_4G022940.1	Soltu.Atl_v3.05_4G022940			MYB	PF00249	Myb-like DNA-binding domain	2e-35	120.5	PGSC0003DMP400040480	99.5	1.29e-149
Soltu.Atl_v3.04_1G015040.1	Soltu.Atl_v3.04_1G015040			GeBP	PF04504	Protein of unknown function, DUF573	3e-35	120.6	PGSC0003DMP400053706	100	3.7e-206
Soltu.Atl_v3.04_4G015220.1	Soltu.Atl_v3.04_4G015220			GeBP	PF04504	Protein of unknown function, DUF573	3e-35	120.6	PGSC0003DMP400053706	99	6.1e-205
Soltu.Atl_v3.04_2G013390.1	Soltu.Atl_v3.04_2G013390			GeBP	PF04504	Protein of unknown function, DUF573	2.9e-35	120.7	PGSC0003DMP400053706	99.4	2.8e-205
Soltu.Atl_v3.04_3G015280.1	Soltu.Atl_v3.04_3G015280			GeBP	PF04504	Protein of unknown function, DUF573	2.9e-35	120.7	PGSC0003DMP400053706	98.7	2.12e-204
Soltu.Atl_v3.01_3G004080.1	Soltu.Atl_v3.01_3G004080			TCP	PF03634	TCP family transcription factor	6.9e-35	120.8	PGSC0003DMP400028586	100	2.22e-172
MSTRG.51434.13	Soltu.Atl_v3.07_4G004070			ARF	PF06507	Auxin response factor	1.8e-35	120.9	PGSC0003DMP400017257	98	4.02e-279
MSTRG.1453.1	Soltu.Atl_v3.01_1G003940			TCP	PF03634	TCP family transcription factor	5.9e-35	121	PGSC0003DMP400028586	96	2.28e-161
Soltu.Atl_v3.01_1G003950.1	Soltu.Atl_v3.01_1G003950			TCP	PF03634	TCP family transcription factor	5.9e-35	121	PGSC0003DMP400028586	96	2.28e-161
Soltu.Atl_v3.01_4G004110.1	Soltu.Atl_v3.01_4G004110			TCP	PF03634	TCP family transcription factor	5.9e-35	121	PGSC0003DMP400028586	95.6	2.77e-162
Soltu.Atl_v3.08_4G016730.12	Soltu.Atl_v3.08_4G016730			LSD	PF06943	LSD1 zinc finger	1e-35	121	PGSC0003DMP400030579	100	4.62e-56
Soltu.Atl_v3.08_4G016730.13	Soltu.Atl_v3.08_4G016730			LSD	PF06943	LSD1 zinc finger	1e-35	121	PGSC0003DMP400030579	94	1.28e-45
MSTRG.33198.3	Soltu.Atl_v3.04_4G015220			GeBP	PF04504	Protein of unknown function, DUF573	2.1e-35	121.1	PGSC0003DMP400053706	99	9.94e-206
MSTRG.10683.10	Soltu.Atl_v3.02_1G011100			LSD	PF06943	LSD1 zinc finger	1e-35	121.1	PGSC0003DMP400036746	98.9	3.49e-64
Soltu.Atl_v3.05_2G004290.1	Soltu.Atl_v3.05_2G004290			MYB	PF00249	Myb-like DNA-binding domain	1.3e-35	121.2	PGSC0003DMP400053171	100	7.24e-133
Soltu.Atl_v3.09_0G000720.1	Soltu.Atl_v3.09_0G000720			MYB	PF00249	Myb-like DNA-binding domain	1.2e-35	121.3	PGSC0003DMP400035326	96.9	2.21e-253
MSTRG.33198.2	Soltu.Atl_v3.04_4G015220			GeBP	PF04504	Protein of unknown function, DUF573	1.7e-35	121.4	PGSC0003DMP400053706	99	5.09e-196
MSTRG.42360.4	Soltu.Atl_v3.06_2G012500			C3H	PF00642	Zinc finger C-x8-C-x5-C-x3-H type (and similar)	6.1e-36	121.5	PGSC0003DMP400064674	97.9	3.11e-64
Soltu.Atl_v3.06_2G007650.1	Soltu.Atl_v3.06_2G007650			HD-ZIP	PF01852	START domain	2.6e-35	121.6	PGSC0003DMP400029101	64.4	6.84e-260
Soltu.Atl_v3.S071230.1	Soltu.Atl_v3.S071230			HD-ZIP	PF01852	START domain	2.6e-35	121.6	PGSC0003DMP400029101	64.4	6.84e-260
Soltu.Atl_v3.04_1G019040.1	Soltu.Atl_v3.04_1G019040			MYB	PF00249	Myb-like DNA-binding domain	9.6e-36	121.6	PGSC0003DMP400014055	95.3	4.28e-167
Soltu.Atl_v3.04_4G019650.1	Soltu.Atl_v3.04_4G019650			MYB	PF00249	Myb-like DNA-binding domain	9.4e-36	121.6	PGSC0003DMP400014055	95.3	6.82e-166
Soltu.Atl_v3.06_2G012540.1	Soltu.Atl_v3.06_2G012540			C3H	PF00642	Zinc finger C-x8-C-x5-C-x3-H type (and similar)	5.9e-36	121.6	PGSC0003DMP400053560	99.7	4.73e-160
Soltu.Atl_v3.04_2G017690.1	Soltu.Atl_v3.04_2G017690			MYB	PF00249	Myb-like DNA-binding domain	9e-36	121.7	PGSC0003DMP400014055	95.3	3.65e-167
Soltu.Atl_v3.04_3G019220.1	Soltu.Atl_v3.04_3G019220			MYB	PF00249	Myb-like DNA-binding domain	9e-36	121.7	PGSC0003DMP400014055	95.3	3.65e-167
Soltu.Atl_v3.S078150.1	Soltu.Atl_v3.S078150			MYB	PF00249	Myb-like DNA-binding domain	9e-36	121.7	PGSC0003DMP400014055	95.3	3.65e-167
Soltu.Atl_v3.08_4G010710.1	Soltu.Atl_v3.08_4G010710			C3H	PF00642	Zinc finger C-x8-C-x5-C-x3-H type (and similar)	5.2e-36	121.7	PGSC0003DMP400053560	95.5	3.98e-149
Soltu.Atl_v3.12_4G007300.2	Soltu.Atl_v3.12_4G007300			ARF	PF06507	Auxin response factor	8.4e-36	121.9	PGSC0003DMP400025462	98.2	0
Soltu.Atl_v3.12_4G007300.1	Soltu.Atl_v3.12_4G007300			ARF	PF06507	Auxin response factor	7.8e-36	122	PGSC0003DMP400025462	98.2	0
Soltu.Atl_v3.09_2G000980.1	Soltu.Atl_v3.09_2G000980			MYB	PF00249	Myb-like DNA-binding domain	6e-36	122.2	PGSC0003DMP400035326	98.2	1.7e-257
Soltu.Atl_v3.03_3G028860.1	Soltu.Atl_v3.03_3G028860			LBD (AS2/LOB)	PF03195	Protein of unknown function DUF260	7.1e-36	122.4	Solyc03g113360.2.1	87.2	3.22e-170
MSTRG.51740.8	Soltu.Atl_v3.07_4G010300			ARF	PF06507	Auxin response factor	6.1e-36	122.4	PGSC0003DMP400004262	94.6	0
Soltu.Atl_v3.12_4G007300.3	Soltu.Atl_v3.12_4G007300			ARF	PF06507	Auxin response factor	6e-36	122.4	PGSC0003DMP400025462	98.1	0
Soltu.Atl_v3.09_0G002420.1	Soltu.Atl_v3.09_0G002420			MYB	PF00249	Myb-like DNA-binding domain	5.4e-36	122.4	PGSC0003DMP400035326	99.2	9.88e-261
Soltu.Atl_v3.08_0G004390.2	Soltu.Atl_v3.08_0G004390			B3	PF02362	B3 DNA binding domain	5.2e-36	122.4	Sopen08g002260.1	45.6	2.85e-146
MSTRG.51740.2	Soltu.Atl_v3.07_4G010300			ARF	PF06507	Auxin response factor	5.6e-36	122.5	PGSC0003DMP400004261	98.1	2.13e-28
Soltu.Atl_v3.S161580.3	Soltu.Atl_v3.S161580			B3	PF02362	B3 DNA binding domain	5e-36	122.5	Sopen08g002260.1	45.5	6.8e-139
Soltu.Atl_v3.06_0G005840.1	Soltu.Atl_v3.06_0G005840			HD-ZIP	PF01852	START domain	1.3e-35	122.6	PGSC0003DMP400029101	63.7	4.97e-255
Soltu.Atl_v3.06_2G007660.1	Soltu.Atl_v3.06_2G007660			HD-ZIP	PF01852	START domain	1.3e-35	122.6	PGSC0003DMP400029101	63.5	8.15e-254
Soltu.Atl_v3.03_2G020950.1	Soltu.Atl_v3.03_2G020950			LBD (AS2/LOB)	PF03195	Protein of unknown function DUF260	6.5e-36	122.6	Solyc03g113360.2.1	86.2	2.51e-167
Soltu.Atl_v3.03_1G023480.1	Soltu.Atl_v3.03_1G023480			LBD (AS2/LOB)	PF03195	Protein of unknown function DUF260	6.3e-36	122.6	Sopen03g032410.1	91	4.39e-190
Soltu.Atl_v3.03_4G019660.1	Soltu.Atl_v3.03_4G019660			LBD (AS2/LOB)	PF03195	Protein of unknown function DUF260	6.3e-36	122.6	Solyc03g113360.2.1	85.9	8.37e-166
MSTRG.51740.7	Soltu.Atl_v3.07_4G010300			ARF	PF06507	Auxin response factor	5.4e-36	122.6	PGSC0003DMP400004262	94.4	0
MSTRG.51740.9	Soltu.Atl_v3.07_4G010300			ARF	PF06507	Auxin response factor	5.2e-36	122.6	PGSC0003DMP400004262	94.3	0
Soltu.Atl_v3.08_0G004390.1	Soltu.Atl_v3.08_0G004390			B3	PF02362	B3 DNA binding domain	4.5e-36	122.6	Sopen08g002260.1	49.1	1.14e-150
MSTRG.51740.1	Soltu.Atl_v3.07_4G010300			ARF	PF06507	Auxin response factor	4.9e-36	122.7	PGSC0003DMP400004262	100	3.79e-148
Soltu.Atl_v3.08_0G004390.4	Soltu.Atl_v3.08_0G004390			B3	PF02362	B3 DNA binding domain	4.3e-36	122.7	Sopen08g002260.1	47.3	5.47e-154
Soltu.Atl_v3.S161580.1	Soltu.Atl_v3.S161580			B3	PF02362	B3 DNA binding domain	4.3e-36	122.7	Sopen08g002260.1	49.1	2.77e-143
Soltu.Atl_v3.08_0G004390.3	Soltu.Atl_v3.08_0G004390			B3	PF02362	B3 DNA binding domain	4.2e-36	122.7	Sopen08g002260.1	48.1	4.21e-153
MSTRG.54214.3	Soltu.Atl_v3.08_1G013030			LSD	PF06943	LSD1 zinc finger	3.1e-36	122.7	PGSC0003DMP400030577	100	2.72e-53
Soltu.Atl_v3.08_1G013030.1	Soltu.Atl_v3.08_1G013030			LSD	PF06943	LSD1 zinc finger	3.1e-36	122.7	PGSC0003DMP400030577	100	2.72e-53
Soltu.Atl_v3.08_4G016730.11	Soltu.Atl_v3.08_4G016730			LSD	PF06943	LSD1 zinc finger	3.1e-36	122.7	PGSC0003DMP400030577	100	2.72e-53
Soltu.Atl_v3.08_4G016730.3	Soltu.Atl_v3.08_4G016730			LSD	PF06943	LSD1 zinc finger	3.1e-36	122.7	PGSC0003DMP400030577	100	2.72e-53
Soltu.Atl_v3.08_4G016730.5	Soltu.Atl_v3.08_4G016730			LSD	PF06943	LSD1 zinc finger	3.1e-36	122.7	PGSC0003DMP400030577	100	2.72e-53
Soltu.Atl_v3.08_1G004270.1	Soltu.Atl_v3.08_1G004270			LBD (AS2/LOB)	PF03195	Protein of unknown function DUF260	5.4e-36	122.8	PGSC0003DMP400066113	79.9	4.24e-132
Soltu.Atl_v3.08_3G005750.1	Soltu.Atl_v3.08_3G005750			LBD (AS2/LOB)	PF03195	Protein of unknown function DUF260	5.4e-36	122.8	PGSC0003DMP400066113	79.9	4.24e-132
Soltu.Atl_v3.S161580.4	Soltu.Atl_v3.S161580			B3	PF02362	B3 DNA binding domain	4.1e-36	122.8	Sopen08g002260.1	47.3	1.35e-146
Soltu.Atl_v3.S161580.2	Soltu.Atl_v3.S161580			B3	PF02362	B3 DNA binding domain	4e-36	122.8	Sopen08g002260.1	48.2	1.03e-145
MSTRG.54214.1	Soltu.Atl_v3.08_1G013030			LSD	PF06943	LSD1 zinc finger	3e-36	122.8	PGSC0003DMP400030578	100	1.16e-44
MSTRG.54214.2	Soltu.Atl_v3.08_1G013030			LSD	PF06943	LSD1 zinc finger	3e-36	122.8	PGSC0003DMP400030578	100	1.16e-44
Soltu.Atl_v3.08_1G013030.2	Soltu.Atl_v3.08_1G013030			LSD	PF06943	LSD1 zinc finger	3e-36	122.8	PGSC0003DMP400030578	100	1.16e-44
Soltu.Atl_v3.08_4G016730.10	Soltu.Atl_v3.08_4G016730			LSD	PF06943	LSD1 zinc finger	3e-36	122.8	PGSC0003DMP400030578	100	1.16e-44
Soltu.Atl_v3.08_4G016730.4	Soltu.Atl_v3.08_4G016730			LSD	PF06943	LSD1 zinc finger	3e-36	122.8	PGSC0003DMP400030578	100	1.16e-44
Soltu.Atl_v3.08_4G016730.6	Soltu.Atl_v3.08_4G016730			LSD	PF06943	LSD1 zinc finger	3e-36	122.8	PGSC0003DMP400030578	100	1.16e-44
MSTRG.17445.1	MSTRG.17445			LSD	PF06943	LSD1 zinc finger	2e-36	123.3	PGSC0003DMP400036746	98.9	1.65e-65
Soltu.Atl_v3.02_1G011100.1	Soltu.Atl_v3.02_1G011100			LSD	PF06943	LSD1 zinc finger	2e-36	123.3	PGSC0003DMP400036746	98.9	1.65e-65
Soltu.Atl_v3.02_1G011100.2	Soltu.Atl_v3.02_1G011100			LSD	PF06943	LSD1 zinc finger	2e-36	123.3	PGSC0003DMP400036746	98.9	1.65e-65
Soltu.Atl_v3.02_1G011100.3	Soltu.Atl_v3.02_1G011100			LSD	PF06943	LSD1 zinc finger	2e-36	123.3	PGSC0003DMP400036746	98.9	1.65e-65
Soltu.Atl_v3.02_1G011100.4	Soltu.Atl_v3.02_1G011100			LSD	PF06943	LSD1 zinc finger	2e-36	123.3	PGSC0003DMP400036746	98.9	1.65e-65
Soltu.Atl_v3.02_1G011100.7	Soltu.Atl_v3.02_1G011100			LSD	PF06943	LSD1 zinc finger	2e-36	123.3	PGSC0003DMP400036746	98.9	1.65e-65
Soltu.Atl_v3.02_1G011100.8	Soltu.Atl_v3.02_1G011100			LSD	PF06943	LSD1 zinc finger	2e-36	123.3	PGSC0003DMP400036746	98.9	1.65e-65
Soltu.Atl_v3.02_1G011100.9	Soltu.Atl_v3.02_1G011100			LSD	PF06943	LSD1 zinc finger	2e-36	123.3	PGSC0003DMP400036746	98.9	1.65e-65
Soltu.Atl_v3.02_2G012820.1	Soltu.Atl_v3.02_2G012820			LSD	PF06943	LSD1 zinc finger	2e-36	123.3	PGSC0003DMP400036746	98.9	1.16e-65
Soltu.Atl_v3.02_2G012820.10	Soltu.Atl_v3.02_2G012820			LSD	PF06943	LSD1 zinc finger	2e-36	123.3	PGSC0003DMP400036746	98.9	1.16e-65
Soltu.Atl_v3.02_2G012820.2	Soltu.Atl_v3.02_2G012820			LSD	PF06943	LSD1 zinc finger	2e-36	123.3	PGSC0003DMP400036746	98.9	1.16e-65
Soltu.Atl_v3.02_2G012820.3	Soltu.Atl_v3.02_2G012820			LSD	PF06943	LSD1 zinc finger	2e-36	123.3	PGSC0003DMP400036746	98.9	1.16e-65
Soltu.Atl_v3.02_2G012820.4	Soltu.Atl_v3.02_2G012820			LSD	PF06943	LSD1 zinc finger	2e-36	123.3	PGSC0003DMP400036746	98.9	1.16e-65
Soltu.Atl_v3.02_2G012820.5	Soltu.Atl_v3.02_2G012820			LSD	PF06943	LSD1 zinc finger	2e-36	123.3	PGSC0003DMP400036746	98.9	1.16e-65
Soltu.Atl_v3.02_2G012820.6	Soltu.Atl_v3.02_2G012820			LSD	PF06943	LSD1 zinc finger	2e-36	123.3	PGSC0003DMP400036746	98.9	1.16e-65
Soltu.Atl_v3.02_2G012820.7	Soltu.Atl_v3.02_2G012820			LSD	PF06943	LSD1 zinc finger	2e-36	123.3	PGSC0003DMP400036746	98.9	1.16e-65
Soltu.Atl_v3.02_3G013150.1	Soltu.Atl_v3.02_3G013150			LSD	PF06943	LSD1 zinc finger	2e-36	123.3	PGSC0003DMP400036746	100	2.02e-66
Soltu.Atl_v3.02_3G013150.2	Soltu.Atl_v3.02_3G013150			LSD	PF06943	LSD1 zinc finger	2e-36	123.3	PGSC0003DMP400036746	100	2.02e-66
Soltu.Atl_v3.02_3G013150.3	Soltu.Atl_v3.02_3G013150			LSD	PF06943	LSD1 zinc finger	2e-36	123.3	PGSC0003DMP400036746	100	2.02e-66
Soltu.Atl_v3.02_3G013150.4	Soltu.Atl_v3.02_3G013150			LSD	PF06943	LSD1 zinc finger	2e-36	123.3	PGSC0003DMP400036746	100	2.02e-66
Soltu.Atl_v3.02_3G013150.6	Soltu.Atl_v3.02_3G013150			LSD	PF06943	LSD1 zinc finger	2e-36	123.3	PGSC0003DMP400036746	100	2.02e-66
MSTRG.78309.3	Soltu.Atl_v3.12_3G015810			CAMTA	PF03859	CG-1 domain	3.6e-36	123.4	Solyc12g035520.1.1	93.9	0
Soltu.Atl_v3.06_1G009670.1	Soltu.Atl_v3.06_1G009670			LBD (AS2/LOB)	PF03195	Protein of unknown function DUF260	3.4e-36	123.5	PGSC0003DMP400008679	97.9	1.66e-236
Soltu.Atl_v3.06_4G014060.1	Soltu.Atl_v3.06_4G014060			LBD (AS2/LOB)	PF03195	Protein of unknown function DUF260	3.4e-36	123.5	PGSC0003DMP400008679	97.9	1.66e-236
Soltu.Atl_v3.06_0G005820.1	Soltu.Atl_v3.06_0G005820			HD-ZIP	PF01852	START domain	6.6e-36	123.6	PGSC0003DMP400029101	64.1	2.26e-258
Soltu.Atl_v3.12_2G012410.2	Soltu.Atl_v3.12_2G012410			ARF	PF06507	Auxin response factor	2.6e-36	123.6	PGSC0003DMP400025462	98.4	0
Soltu.Atl_v3.12_2G012410.1	Soltu.Atl_v3.12_2G012410			ARF	PF06507	Auxin response factor	2.4e-36	123.7	PGSC0003DMP400025462	98.4	0
MSTRG.84031.6	Soltu.Atl_v3.S085200			C3H	PF00642	Zinc finger C-x8-C-x5-C-x3-H type (and similar)	1.2e-36	123.7	PGSC0003DMP400039261	82.7	2.67e-183
Soltu.Atl_v3.12_3G015810.3	Soltu.Atl_v3.12_3G015810			CAMTA	PF03859	CG-1 domain	2.3e-36	124	Solyc12g035520.1.1	92.9	0
Soltu.Atl_v3.08_0G003440.3	Soltu.Atl_v3.08_0G003440			B3	PF02362	B3 DNA binding domain	1.6e-36	124.1	Sopen08g002260.1	48.8	3.16e-152
Soltu.Atl_v3.04_3G014830.1	Soltu.Atl_v3.04_3G014830			MYB	PF00249	Myb-like DNA-binding domain	1.5e-36	124.1	PGSC0003DMP400011365	97.2	2.33e-237
Soltu.Atl_v3.04_1G014650.1	Soltu.Atl_v3.04_1G014650			MYB	PF00249	Myb-like DNA-binding domain	1.5e-36	124.2	PGSC0003DMP400011365	97.7	1.65e-241
Soltu.Atl_v3.06_2G018990.1	Soltu.Atl_v3.06_2G018990			LBD (AS2/LOB)	PF03195	Protein of unknown function DUF260	1.8e-36	124.3	PGSC0003DMP400008679	91.3	6.3e-219
Soltu.Atl_v3.07_4G009940.1	Soltu.Atl_v3.07_4G009940			HD-ZIP	PF01852	START domain	3.7e-36	124.4	PGSC0003DMP400033095	100	0
Soltu.Atl_v3.07_4G009950.1	Soltu.Atl_v3.07_4G009950			HD-ZIP	PF01852	START domain	3.7e-36	124.4	PGSC0003DMP400033095	100	0
Soltu.Atl_v3.10_3G009090.2	Soltu.Atl_v3.10_3G009090			FAR1	PF03101	FAR1 DNA-binding domain	2.1e-36	124.4	Solyc10g084220.1.1	97.1	0
Soltu.Atl_v3.06_3G012810.1	Soltu.Atl_v3.06_3G012810			LBD (AS2/LOB)	PF03195	Protein of unknown function DUF260	1.8e-36	124.4	PGSC0003DMP400008679	96.7	2e-234
Soltu.Atl_v3.08_0G003440.2	Soltu.Atl_v3.08_0G003440			B3	PF02362	B3 DNA binding domain	1.3e-36	124.4	Sopen08g002260.1	52	6.95e-158
Soltu.Atl_v3.06_1G001310.2	Soltu.Atl_v3.06_1G001310			C3H	PF00642	Zinc finger C-x8-C-x5-C-x3-H type (and similar)	7.8e-37	124.4	PGSC0003DMP400009445	81.6	1.38e-160
Soltu.Atl_v3.06_3G001510.2	Soltu.Atl_v3.06_3G001510			C3H	PF00642	Zinc finger C-x8-C-x5-C-x3-H type (and similar)	7.8e-37	124.4	PGSC0003DMP400009445	81.6	1.38e-160
Soltu.Atl_v3.10_3G009090.3	Soltu.Atl_v3.10_3G009090			FAR1	PF03101	FAR1 DNA-binding domain	2e-36	124.5	Solyc10g084220.1.1	97.1	0
Soltu.Atl_v3.10_0G013960.2	Soltu.Atl_v3.10_0G013960			FAR1	PF03101	FAR1 DNA-binding domain	1.9e-36	124.5	Solyc10g084220.1.1	96.9	0
Soltu.Atl_v3.10_2G011390.1	Soltu.Atl_v3.10_2G011390			FAR1	PF03101	FAR1 DNA-binding domain	1.9e-36	124.5	Solyc10g084220.1.1	96.4	0
Soltu.Atl_v3.10_3G009090.1	Soltu.Atl_v3.10_3G009090			FAR1	PF03101	FAR1 DNA-binding domain	1.9e-36	124.5	Solyc10g084220.1.1	97.1	0
Soltu.Atl_v3.10_0G013960.1	Soltu.Atl_v3.10_0G013960			FAR1	PF03101	FAR1 DNA-binding domain	1.8e-36	124.6	Solyc10g084220.1.1	96.9	0
Soltu.Atl_v3.10_2G011390.2	Soltu.Atl_v3.10_2G011390			FAR1	PF03101	FAR1 DNA-binding domain	1.8e-36	124.6	Solyc10g084220.1.1	96.4	0
Soltu.Atl_v3.02_1G011100.5	Soltu.Atl_v3.02_1G011100			LSD	PF06943	LSD1 zinc finger	7.8e-37	124.6	PGSC0003DMP400036746	97.8	3.18e-42
Soltu.Atl_v3.02_1G011100.6	Soltu.Atl_v3.02_1G011100			LSD	PF06943	LSD1 zinc finger	7.8e-37	124.6	PGSC0003DMP400036746	97.8	3.18e-42
Soltu.Atl_v3.11_3G014140.3	Soltu.Atl_v3.11_3G014140			B3	PF02362	B3 DNA binding domain	1e-36	124.7	PGSC0003DMP400024049	91.2	3.12e-124
Soltu.Atl_v3.08_4G008220.1	Soltu.Atl_v3.08_4G008220			LBD (AS2/LOB)	PF03195	Protein of unknown function DUF260	1.3e-36	124.9	PGSC0003DMP400066113	81.6	5.07e-130
Soltu.Atl_v3.06_4G005520.1	Soltu.Atl_v3.06_4G005520			HD-ZIP	PF01852	START domain	2.3e-36	125	PGSC0003DMP400029101	64.5	8.51e-258
MSTRG.4714.1	Soltu.Atl_v3.01_2G031750			ARF	PF06507	Auxin response factor	9.6e-37	125	PGSC0003DMP400036011	99.7	0
MSTRG.4714.2	Soltu.Atl_v3.01_2G031750			ARF	PF06507	Auxin response factor	9.6e-37	125	PGSC0003DMP400036011	99.7	0
MSTRG.4714.3	Soltu.Atl_v3.01_2G031750			ARF	PF06507	Auxin response factor	9.6e-37	125	PGSC0003DMP400036011	99.7	0
MSTRG.6785.1	Soltu.Atl_v3.01_3G027450			ARF	PF06507	Auxin response factor	9.6e-37	125	PGSC0003DMP400036011	99.7	0
MSTRG.6785.2	Soltu.Atl_v3.01_3G027450			ARF	PF06507	Auxin response factor	9.6e-37	125	PGSC0003DMP400036011	99.7	0
MSTRG.6785.3	Soltu.Atl_v3.01_3G027450			ARF	PF06507	Auxin response factor	9.6e-37	125	PGSC0003DMP400036011	99.7	0
MSTRG.852.1	Soltu.Atl_v3.01_0G016110			ARF	PF06507	Auxin response factor	9.6e-37	125	PGSC0003DMP400036011	100	0
MSTRG.852.2	Soltu.Atl_v3.01_0G016110			ARF	PF06507	Auxin response factor	9.6e-37	125	PGSC0003DMP400036011	100	0
MSTRG.852.3	Soltu.Atl_v3.01_0G016110			ARF	PF06507	Auxin response factor	9.6e-37	125	PGSC0003DMP400036011	100	0
MSTRG.9228.1	Soltu.Atl_v3.01_4G029270			ARF	PF06507	Auxin response factor	9.5e-37	125	PGSC0003DMP400036011	99.7	0
MSTRG.9228.2	Soltu.Atl_v3.01_4G029270			ARF	PF06507	Auxin response factor	9.5e-37	125	PGSC0003DMP400036011	99.7	0
Soltu.Atl_v3.01_0G016110.1	Soltu.Atl_v3.01_0G016110			ARF	PF06507	Auxin response factor	9.2e-37	125	PGSC0003DMP400036011	98.3	0
Soltu.Atl_v3.02_0G003220.1	Soltu.Atl_v3.02_0G003220			MYB	PF00249	Myb-like DNA-binding domain	8.2e-37	125	PGSC0003DMP400043359	97	5.24e-240
MSTRG.4714.4	Soltu.Atl_v3.01_2G031750			ARF	PF06507	Auxin response factor	8.7e-37	125.1	PGSC0003DMP400036011	93.4	0
Soltu.Atl_v3.01_2G031750.1	Soltu.Atl_v3.01_2G031750			ARF	PF06507	Auxin response factor	8.7e-37	125.1	PGSC0003DMP400036011	93.4	0
Soltu.Atl_v3.01_3G027450.1	Soltu.Atl_v3.01_3G027450			ARF	PF06507	Auxin response factor	8.7e-37	125.1	PGSC0003DMP400036011	93.4	0
Soltu.Atl_v3.06_1G001310.6	Soltu.Atl_v3.06_1G001310			C3H	PF00642	Zinc finger C-x8-C-x5-C-x3-H type (and similar)	4.5e-37	125.1	PGSC0003DMP400009444	99.7	5.36e-198
Soltu.Atl_v3.06_3G001510.7	Soltu.Atl_v3.06_3G001510			C3H	PF00642	Zinc finger C-x8-C-x5-C-x3-H type (and similar)	4.5e-37	125.1	PGSC0003DMP400009444	99.7	5.36e-198
Soltu.Atl_v3.06_2G009980.1	Soltu.Atl_v3.06_2G009980			HD-ZIP	PF01852	START domain	1.9e-36	125.3	PGSC0003DMP400052108	83.9	0
Soltu.Atl_v3.08_2G008900.1	Soltu.Atl_v3.08_2G008900			LBD (AS2/LOB)	PF03195	Protein of unknown function DUF260	9.1e-37	125.3	PGSC0003DMP400066113	72.3	1.72e-105
Soltu.Atl_v3.03_1G028430.1	Soltu.Atl_v3.03_1G028430			ARF	PF06507	Auxin response factor	7.5e-37	125.3	PGSC0003DMP400024934	98.6	0
Soltu.Atl_v3.S125760.1	Soltu.Atl_v3.S125760			ARF	PF06507	Auxin response factor	7.5e-37	125.3	PGSC0003DMP400024934	98.6	0
Soltu.Atl_v3.S125770.1	Soltu.Atl_v3.S125770			ARF	PF06507	Auxin response factor	7.5e-37	125.3	PGSC0003DMP400024934	98.6	0
Soltu.Atl_v3.06_2G001100.1	Soltu.Atl_v3.06_2G001100			C3H	PF00642	Zinc finger C-x8-C-x5-C-x3-H type (and similar)	4.1e-37	125.3	PGSC0003DMP400009445	81.9	4.84e-161
MSTRG.20915.1	Soltu.Atl_v3.03_1G028430			ARF	PF06507	Auxin response factor	7.2e-37	125.4	PGSC0003DMP400024934	99.2	0
MSTRG.86378.1	Soltu.Atl_v3.S125760			ARF	PF06507	Auxin response factor	7.2e-37	125.4	PGSC0003DMP400024934	99.2	0
MSTRG.86379.1	Soltu.Atl_v3.S125770			ARF	PF06507	Auxin response factor	7.2e-37	125.4	PGSC0003DMP400024934	99.2	0
MSTRG.86383.3	Soltu.Atl_v3.S125790			ARF	PF06507	Auxin response factor	7.2e-37	125.4	PGSC0003DMP400024934	99.2	0
Soltu.Atl_v3.03_3G034130.2	Soltu.Atl_v3.03_3G034130			ARF	PF06507	Auxin response factor	7.2e-37	125.4	PGSC0003DMP400024934	97.6	0
MSTRG.24985.2	Soltu.Atl_v3.03_3G034130			ARF	PF06507	Auxin response factor	7e-37	125.4	PGSC0003DMP400024934	97.5	0
Soltu.Atl_v3.03_3G034130.1	Soltu.Atl_v3.03_3G034130			ARF	PF06507	Auxin response factor	7e-37	125.4	PGSC0003DMP400024934	97.6	0
Soltu.Atl_v3.S085200.2	Soltu.Atl_v3.S085200			C3H	PF00642	Zinc finger C-x8-C-x5-C-x3-H type (and similar)	3.4e-37	125.5	PGSC0003DMP400039261	99.7	1.81e-182
Soltu.Atl_v3.S085220.2	Soltu.Atl_v3.S085220			C3H	PF00642	Zinc finger C-x8-C-x5-C-x3-H type (and similar)	3.4e-37	125.5	PGSC0003DMP400039261	99.7	1.81e-182
MSTRG.24985.1	Soltu.Atl_v3.03_3G034130			ARF	PF06507	Auxin response factor	6.1e-37	125.6	PGSC0003DMP400024934	97.4	0
MSTRG.24985.3	Soltu.Atl_v3.03_3G034130			ARF	PF06507	Auxin response factor	6.1e-37	125.6	PGSC0003DMP400024934	97.4	0
Soltu.Atl_v3.S125790.1	Soltu.Atl_v3.S125790			ARF	PF06507	Auxin response factor	6e-37	125.6	PGSC0003DMP400024934	98.4	0
Soltu.Atl_v3.S125790.2	Soltu.Atl_v3.S125790			ARF	PF06507	Auxin response factor	6e-37	125.6	PGSC0003DMP400024934	98.4	0
MSTRG.56198.2	Soltu.Atl_v3.08_3G005600			LFY	PF01698	Floricaula / Leafy protein	2.1e-36	125.8	PGSC0003DMP400024921	92.4	9.35e-51
Soltu.Atl_v3.08_1G004150.1	Soltu.Atl_v3.08_1G004150			LFY	PF01698	Floricaula / Leafy protein	2.1e-36	125.8	PGSC0003DMP400024921	93.6	3.81e-50
Soltu.Atl_v3.08_3G005630.1	Soltu.Atl_v3.08_3G005630			LFY	PF01698	Floricaula / Leafy protein	2.1e-36	125.8	PGSC0003DMP400024921	93.6	3.81e-50
Soltu.Atl_v3.01_2G018840.4	Soltu.Atl_v3.01_2G018840			C3H	PF00642	Zinc finger C-x8-C-x5-C-x3-H type (and similar)	2.3e-37	126	PGSC0003DMP400039261	96.1	1.27e-177
Soltu.Atl_v3.04_2G016550.1	Soltu.Atl_v3.04_2G016550			MYB	PF00249	Myb-like DNA-binding domain	3.7e-37	126.1	PGSC0003DMP400005949	93.4	5.64e-209
Soltu.Atl_v3.04_3G018070.1	Soltu.Atl_v3.04_3G018070			MYB	PF00249	Myb-like DNA-binding domain	3.7e-37	126.1	PGSC0003DMP400005949	93.4	5.64e-209
Soltu.Atl_v3.12_3G001640.2	Soltu.Atl_v3.12_3G001640			CAMTA	PF03859	CG-1 domain	3.6e-37	126.6	Sopen12g034010.1	94.8	0
Soltu.Atl_v3.04_1G018050.1	Soltu.Atl_v3.04_1G018050			MYB	PF00249	Myb-like DNA-binding domain	2.3e-37	126.7	PGSC0003DMP400005949	93.1	1.38e-159
Soltu.Atl_v3.04_4G018640.1	Soltu.Atl_v3.04_4G018640			MYB	PF00249	Myb-like DNA-binding domain	2.3e-37	126.7	PGSC0003DMP400005949	89.5	9.69e-159
Soltu.Atl_v3.02_2G029580.1	Soltu.Atl_v3.02_2G029580			TCP	PF03634	TCP family transcription factor	9.1e-37	126.9	PGSC0003DMP400017770	88.3	1.83e-142
Soltu.Atl_v3.07_3G010490.1	Soltu.Atl_v3.07_3G010490			HD-ZIP	PF01852	START domain	6.4e-37	126.9	PGSC0003DMP400033095	97	0
Soltu.Atl_v3.06_3G023290.1	Soltu.Atl_v3.06_3G023290			LBD (AS2/LOB)	PF03195	Protein of unknown function DUF260	2.7e-37	127	PGSC0003DMP400034796	97.9	4.09e-136
Soltu.Atl_v3.06_4G024410.1	Soltu.Atl_v3.06_4G024410			LBD (AS2/LOB)	PF03195	Protein of unknown function DUF260	2.7e-37	127	PGSC0003DMP400034796	100	7.36e-139
Soltu.Atl_v3.09_2G013030.1	Soltu.Atl_v3.09_2G013030			LBD (AS2/LOB)	PF03195	Protein of unknown function DUF260	2.7e-37	127	PGSC0003DMP400034796	97.9	2.03e-136
Soltu.Atl_v3.04_2G012970.1	Soltu.Atl_v3.04_2G012970			MYB	PF00249	Myb-like DNA-binding domain	1.5e-37	127.4	PGSC0003DMP400011365	97.5	5.76e-118
Soltu.Atl_v3.02_3G031390.1	Soltu.Atl_v3.02_3G031390			TCP	PF03634	TCP family transcription factor	4.9e-37	127.7	PGSC0003DMP400017770	98.7	5.87e-162
Soltu.Atl_v3.05_1G005410.3	Soltu.Atl_v3.05_1G005410			Whirly	PF08536	Whirly transcription factor	2.3e-37	127.7	PGSC0003DMP400030789	98.3	1.79e-114
Soltu.Atl_v3.11_1G002470.5	Soltu.Atl_v3.11_1G002470			C3H	PF00642	Zinc finger C-x8-C-x5-C-x3-H type (and similar)	6.5e-38	127.8	PGSC0003DMP400028358	83.4	5.41e-178
Soltu.Atl_v3.09_0G012560.1	Soltu.Atl_v3.09_0G012560			LBD (AS2/LOB)	PF03195	Protein of unknown function DUF260	1.3e-37	128	PGSC0003DMP400017152	99.2	2.72e-177
Soltu.Atl_v3.09_0G013280.1	Soltu.Atl_v3.09_0G013280			LBD (AS2/LOB)	PF03195	Protein of unknown function DUF260	1.3e-37	128	PGSC0003DMP400017152	99.2	2.72e-177
Soltu.Atl_v3.09_3G016990.1	Soltu.Atl_v3.09_3G016990			LBD (AS2/LOB)	PF03195	Protein of unknown function DUF260	1.3e-37	128	PGSC0003DMP400017152	99.6	8.13e-179
Soltu.Atl_v3.09_4G015640.1	Soltu.Atl_v3.09_4G015640			LBD (AS2/LOB)	PF03195	Protein of unknown function DUF260	1.3e-37	128.1	PGSC0003DMP400017152	99.2	1.15e-178
Soltu.Atl_v3.11_3G002180.4	Soltu.Atl_v3.11_3G002180			C3H	PF00642	Zinc finger C-x8-C-x5-C-x3-H type (and similar)	5.1e-38	128.1	PGSC0003DMP400028358	100	8.83e-194
Soltu.Atl_v3.09_0G012550.1	Soltu.Atl_v3.09_0G012550			LBD (AS2/LOB)	PF03195	Protein of unknown function DUF260	1.2e-37	128.2	PGSC0003DMP400017148	98.6	9.02e-148
Soltu.Atl_v3.09_0G013290.1	Soltu.Atl_v3.09_0G013290			LBD (AS2/LOB)	PF03195	Protein of unknown function DUF260	1.2e-37	128.2	PGSC0003DMP400017148	98.6	9.02e-148
Soltu.Atl_v3.07_3G010500.1	Soltu.Atl_v3.07_3G010500			HD-ZIP	PF01852	START domain	2.2e-37	128.3	PGSC0003DMP400033095	97.9	0
Soltu.Atl_v3.06_1G017880.1	Soltu.Atl_v3.06_1G017880			LBD (AS2/LOB)	PF03195	Protein of unknown function DUF260	1.1e-37	128.3	PGSC0003DMP400034796	97.9	3.36e-135
Soltu.Atl_v3.05_2G005640.3	Soltu.Atl_v3.05_2G005640			Whirly	PF08536	Whirly transcription factor	1.3e-37	128.5	PGSC0003DMP400030789	94.4	4.73e-114
MSTRG.14536.1	Soltu.Atl_v3.02_3G003050			LSD	PF06943	LSD1 zinc finger	4.7e-38	128.5	PGSC0003DMP400036746	84.2	4.51e-40
Soltu.Atl_v3.05_4G002350.1	Soltu.Atl_v3.05_4G002350			TCP	PF03634	TCP family transcription factor	2.6e-37	128.7	PGSC0003DMP400001569	99.1	4.07e-230
Soltu.Atl_v3.05_1G001860.1	Soltu.Atl_v3.05_1G001860			TCP	PF03634	TCP family transcription factor	2.5e-37	128.7	PGSC0003DMP400001569	97.9	1.06e-224
Soltu.Atl_v3.11_1G009210.1	Soltu.Atl_v3.11_1G009210			TCP	PF03634	TCP family transcription factor	2.5e-37	128.7	PGSC0003DMP400016357	94	1.37e-229
Soltu.Atl_v3.11_2G005670.1	Soltu.Atl_v3.11_2G005670			TCP	PF03634	TCP family transcription factor	2.5e-37	128.7	PGSC0003DMP400016357	94	1.37e-229
Soltu.Atl_v3.09_4G015630.1	Soltu.Atl_v3.09_4G015630			LBD (AS2/LOB)	PF03195	Protein of unknown function DUF260	8e-38	128.7	PGSC0003DMP400017148	98.6	6.35e-148
Soltu.Atl_v3.09_3G016980.1	Soltu.Atl_v3.09_3G016980			LBD (AS2/LOB)	PF03195	Protein of unknown function DUF260	7.9e-38	128.7	PGSC0003DMP400017148	99.1	2.4e-150
Soltu.Atl_v3.02_4G023950.1	Soltu.Atl_v3.02_4G023950			LBD (AS2/LOB)	PF03195	Protein of unknown function DUF260	7.7e-38	128.7	PGSC0003DMP400060875	100	1.04e-85
MSTRG.10182.1	Soltu.Atl_v3.02_1G002170			LSD	PF06943	LSD1 zinc finger	4e-38	128.7	PGSC0003DMP400036746	84.5	7.3e-45
MSTRG.12353.7	Soltu.Atl_v3.02_2G003140			LSD	PF06943	LSD1 zinc finger	4e-38	128.7	PGSC0003DMP400036746	84.5	7.3e-45
MSTRG.16898.2	Soltu.Atl_v3.02_4G003200			LSD	PF06943	LSD1 zinc finger	4e-38	128.7	PGSC0003DMP400036746	84.5	7.3e-45
Soltu.Atl_v3.05_2G001960.1	Soltu.Atl_v3.05_2G001960			TCP	PF03634	TCP family transcription factor	2.4e-37	128.8	PGSC0003DMP400001569	94.1	3.31e-225
Soltu.Atl_v3.11_4G011570.1	Soltu.Atl_v3.11_4G011570			TCP	PF03634	TCP family transcription factor	2.4e-37	128.8	PGSC0003DMP400016357	90.7	8.77e-217
Soltu.Atl_v3.06_4G005880.1	Soltu.Atl_v3.06_4G005880			HD-ZIP	PF01852	START domain	1.4e-37	129	PGSC0003DMP400029101	66.5	5.84e-273
Soltu.Atl_v3.06_4G023160.2	Soltu.Atl_v3.06_4G023160			LBD (AS2/LOB)	PF03195	Protein of unknown function DUF260	6.6e-38	129	PGSC0003DMP400048106	94.5	1.91e-77
Soltu.Atl_v3.02_1G029300.1	Soltu.Atl_v3.02_1G029300			LBD (AS2/LOB)	PF03195	Protein of unknown function DUF260	6e-38	129.1	PGSC0003DMP400060875	99.2	1.04e-85
Soltu.Atl_v3.02_2G032450.1	Soltu.Atl_v3.02_2G032450			LBD (AS2/LOB)	PF03195	Protein of unknown function DUF260	6e-38	129.1	PGSC0003DMP400060875	98.4	1.73e-84
Soltu.Atl_v3.02_3G031820.1	Soltu.Atl_v3.02_3G031820			LBD (AS2/LOB)	PF03195	Protein of unknown function DUF260	6e-38	129.1	PGSC0003DMP400060875	99.2	1.04e-85
Soltu.Atl_v3.01_3G019930.1	Soltu.Atl_v3.01_3G019930			LBD (AS2/LOB)	PF03195	Protein of unknown function DUF260	5.8e-38	129.1	PGSC0003DMP400022599	94.8	8.03e-86
Soltu.Atl_v3.01_4G022900.1	Soltu.Atl_v3.01_4G022900			LBD (AS2/LOB)	PF03195	Protein of unknown function DUF260	5.8e-38	129.1	PGSC0003DMP400022599	85.3	5.71e-75
Soltu.Atl_v3.S073420.1	Soltu.Atl_v3.S073420			LBD (AS2/LOB)	PF03195	Protein of unknown function DUF260	5.8e-38	129.1	PGSC0003DMP400022599	85.3	5.71e-75
Soltu.Atl_v3.12_0G006920.4	Soltu.Atl_v3.12_0G006920			WRKY	PF03106	WRKY DNA -binding domain	4.8e-38	129.2	PGSC0003DMP400051947	89.2	0
MSTRG.69703.5	Soltu.Atl_v3.11_1G002470			C3H	PF00642	Zinc finger C-x8-C-x5-C-x3-H type (and similar)	2.3e-38	129.2	PGSC0003DMP400028358	83.4	1.84e-178
Soltu.Atl_v3.11_1G002470.1	Soltu.Atl_v3.11_1G002470			C3H	PF00642	Zinc finger C-x8-C-x5-C-x3-H type (and similar)	2.3e-38	129.2	PGSC0003DMP400028358	83.4	1.84e-178
Soltu.Atl_v3.11_2G001710.1	Soltu.Atl_v3.11_2G001710			C3H	PF00642	Zinc finger C-x8-C-x5-C-x3-H type (and similar)	2.3e-38	129.2	PGSC0003DMP400028358	83.4	1.84e-178
Soltu.Atl_v3.11_3G002180.3	Soltu.Atl_v3.11_3G002180			C3H	PF00642	Zinc finger C-x8-C-x5-C-x3-H type (and similar)	2.3e-38	129.2	PGSC0003DMP400028358	83.4	1.84e-178
Soltu.Atl_v3.01_2G024430.1	Soltu.Atl_v3.01_2G024430			LBD (AS2/LOB)	PF03195	Protein of unknown function DUF260	5.3e-38	129.3	PGSC0003DMP400022599	100	7.51e-93
Soltu.Atl_v3.04_1G011320.1	Soltu.Atl_v3.04_1G011320			LBD (AS2/LOB)	PF03195	Protein of unknown function DUF260	4.5e-38	129.5	PGSC0003DMP400007398	96.5	3.56e-116
Soltu.Atl_v3.06_2G029070.2	Soltu.Atl_v3.06_2G029070			LBD (AS2/LOB)	PF03195	Protein of unknown function DUF260	4.5e-38	129.5	PGSC0003DMP400048106	96.3	4.71e-45
[truncated: 1,545 more rows]
